# Supplementary material
Source: publisher figshare collection journal article supplement (https://sage.figshare.com/ndownloader/files/12974006)
Supplement: Supplementary file 1 [file 12974006]

Archive with 21 entries (20 files):
- OnlineAppendixJCR_16_0025.aux
- __MACOSX/
- __MACOSX/._OnlineAppendixJCR_16_0025.aux
- OnlineAppendixJCR_16_0025.bbl
- __MACOSX/._OnlineAppendixJCR_16_0025.bbl
- OnlineAppendixJCR_16_0025.blg
- __MACOSX/._OnlineAppendixJCR_16_0025.blg
- OnlineAppendixJCR_16_0025.fdb_latexmk
- __MACOSX/._OnlineAppendixJCR_16_0025.fdb_latexmk
- OnlineAppendixJCR_16_0025.fls
- __MACOSX/._OnlineAppendixJCR_16_0025.fls
- OnlineAppendixJCR_16_0025.log
- __MACOSX/._OnlineAppendixJCR_16_0025.log
- OnlineAppendixJCR_16_0025.out
- __MACOSX/._OnlineAppendixJCR_16_0025.out
- OnlineAppendixJCR_16_0025.pdf
- __MACOSX/._OnlineAppendixJCR_16_0025.pdf
- OnlineAppendixJCR_16_0025.synctex.gz
- __MACOSX/._OnlineAppendixJCR_16_0025.synctex.gz
- OnlineAppendixJCR_16_0025.tex
- __MACOSX/._OnlineAppendixJCR_16_0025.tex
