# Supplementary material
Source: publisher figshare collection journal article supplement (https://sage.figshare.com/ndownloader/files/12974006)
Supplement: Supplementary file 1 [file 12974006 › OnlineAppendixJCR_16_0025.aux]

\relax 
\providecommand\hyper@newdestlabel[2]{}
\providecommand\HyperFirstAtBeginDocument{\AtBeginDocument}
\HyperFirstAtBeginDocument{\ifx\hyper@anchor\@undefined
\global\let\oldcontentsline\contentsline
\gdef\contentsline#1#2#3#4{\oldcontentsline{#1}{#2}{#3}}
\global\let\oldnewlabel\newlabel
\gdef\newlabel#1#2{\newlabelxx{#1}#2}
\gdef\newlabelxx#1#2#3#4#5#6{\oldnewlabel{#1}{{#2}{#3}}}
\AtEndDocument{\ifx\hyper@anchor\@undefined
\let\contentsline\oldcontentsline
\let\newlabel\oldnewlabel
\fi}
\fi}
\global\let\hyper@last\relax 
\gdef\HyperFirstAtBeginDocument#1{#1}
\providecommand\HyField@AuxAddToFields[1]{}
\providecommand\HyField@AuxAddToCoFields[2]{}
\@writefile{toc}{\contentsline {section}{\numberline {S1}Robustness Checks}{S1}{appendix.A}}
\newlabel{s:robustness}{{S1}{S1}{Robustness Checks}{appendix.A}{}}
\@writefile{lot}{\contentsline {table}{\numberline {S1.1}{\ignorespaces Correlation Coefficients - Instrument and Socioeconomic Outcomes\relax }}{S1}{table.caption.1}}
\providecommand*\caption@xref[2]{\@setref\relax\@undefined{#1}}
\newlabel{TaCorr}{{S1.1}{S1}{Correlation Coefficients - Instrument and Socioeconomic Outcomes\relax }{table.caption.1}{}}
\citation{Guggenberger2012}
\citation{Guggenberger2012}
\citation{Guggenberger2012}
\citation{Guggenberger2012}
\@writefile{toc}{\contentsline {subsection}{\numberline {S1.1}Use of alternative cut-off levels for shock definition}{S2}{subsection.A.1}}
\@writefile{lot}{\contentsline {table}{\numberline {S1.2}{\ignorespaces \relax \fontsize  {10.95}{13.6}\selectfont  \abovedisplayskip 11\p@ plus3\p@ minus6\p@ \abovedisplayshortskip \z@ plus3\p@ \belowdisplayshortskip 6.5\p@ plus3.5\p@ minus3\p@ \def \leftmargin \leftmargini \topsep 6\p@ plus2\p@ minus2\p@ \parsep 3\p@ plus2\p@ minus\p@ \itemsep \parsep {\leftmargin \leftmargini \topsep 9\p@ plus3\p@ minus5\p@ \parsep 4.5\p@ plus2\p@ minus\p@ \itemsep \parsep }\belowdisplayskip \abovedisplayskip Robustness Cut-off (10th percentile): Youth Bulges and Civil Conflict Incidence: 2SLS-IV\relax }}{S2}{table.caption.2}}
\newlabel{TaICO15}{{S1.2}{S2}{\small Robustness Cut-off (10th percentile): Youth Bulges and Civil Conflict Incidence: 2SLS-IV\relax }{table.caption.2}{}}
\@writefile{lot}{\contentsline {table}{\numberline {S1.3}{\ignorespaces \relax \fontsize  {10.95}{13.6}\selectfont  \abovedisplayskip 11\p@ plus3\p@ minus6\p@ \abovedisplayshortskip \z@ plus3\p@ \belowdisplayshortskip 6.5\p@ plus3.5\p@ minus3\p@ \def \leftmargin \leftmargini \topsep 6\p@ plus2\p@ minus2\p@ \parsep 3\p@ plus2\p@ minus\p@ \itemsep \parsep {\leftmargin \leftmargini \topsep 9\p@ plus3\p@ minus5\p@ \parsep 4.5\p@ plus2\p@ minus\p@ \itemsep \parsep }\belowdisplayskip \abovedisplayskip Robustness Cut-off (15th percentile): Youth Bulges and Civil Conflict Incidence: 2SLS-IV\relax }}{S3}{table.caption.3}}
\newlabel{TaICO15a}{{S1.3}{S3}{\small Robustness Cut-off (15th percentile): Youth Bulges and Civil Conflict Incidence: 2SLS-IV\relax }{table.caption.3}{}}
\@writefile{lot}{\contentsline {table}{\numberline {S1.4}{\ignorespaces \relax \fontsize  {10.95}{13.6}\selectfont  \abovedisplayskip 11\p@ plus3\p@ minus6\p@ \abovedisplayshortskip \z@ plus3\p@ \belowdisplayshortskip 6.5\p@ plus3.5\p@ minus3\p@ \def \leftmargin \leftmargini \topsep 6\p@ plus2\p@ minus2\p@ \parsep 3\p@ plus2\p@ minus\p@ \itemsep \parsep {\leftmargin \leftmargini \topsep 9\p@ plus3\p@ minus5\p@ \parsep 4.5\p@ plus2\p@ minus\p@ \itemsep \parsep }\belowdisplayskip \abovedisplayskip Robustness Cut-off (25th percentile): Youth Bulges and Civil Conflict Incidence: 2SLS-IV\relax }}{S3}{table.caption.4}}
\newlabel{TaICO25}{{S1.4}{S3}{\small Robustness Cut-off (25th percentile): Youth Bulges and Civil Conflict Incidence: 2SLS-IV\relax }{table.caption.4}{}}
\@writefile{lot}{\contentsline {table}{\numberline {S1.5}{\ignorespaces \relax \fontsize  {10.95}{13.6}\selectfont  \abovedisplayskip 11\p@ plus3\p@ minus6\p@ \abovedisplayshortskip \z@ plus3\p@ \belowdisplayshortskip 6.5\p@ plus3.5\p@ minus3\p@ \def \leftmargin \leftmargini \topsep 6\p@ plus2\p@ minus2\p@ \parsep 3\p@ plus2\p@ minus\p@ \itemsep \parsep {\leftmargin \leftmargini \topsep 9\p@ plus3\p@ minus5\p@ \parsep 4.5\p@ plus2\p@ minus\p@ \itemsep \parsep }\belowdisplayskip \abovedisplayskip Robustness Cut-off (30th percentile): Youth Bulges and Civil Conflict Incidence: 2SLS-IV\relax }}{S4}{table.caption.5}}
\newlabel{TaICO035}{{S1.5}{S4}{\small Robustness Cut-off (30th percentile): Youth Bulges and Civil Conflict Incidence: 2SLS-IV\relax }{table.caption.5}{}}
\citation{Guggenberger2012}
\citation{Guggenberger2012}
\@writefile{toc}{\contentsline {subsection}{\numberline {S1.2}Use of alternative cut-off time scale of SPEI}{S5}{subsection.A.2}}
\@writefile{lot}{\contentsline {table}{\numberline {S1.6}{\ignorespaces \relax \fontsize  {10.95}{13.6}\selectfont  \abovedisplayskip 11\p@ plus3\p@ minus6\p@ \abovedisplayshortskip \z@ plus3\p@ \belowdisplayshortskip 6.5\p@ plus3.5\p@ minus3\p@ \def \leftmargin \leftmargini \topsep 6\p@ plus2\p@ minus2\p@ \parsep 3\p@ plus2\p@ minus\p@ \itemsep \parsep {\leftmargin \leftmargini \topsep 9\p@ plus3\p@ minus5\p@ \parsep 4.5\p@ plus2\p@ minus\p@ \itemsep \parsep }\belowdisplayskip \abovedisplayskip Robustness Time Scale SPEI (3 months): Youth Bulges and Civil Conflict Incidence: 2SLS-IV\relax }}{S5}{table.caption.6}}
\newlabel{TabTS3}{{S1.6}{S5}{\small Robustness Time Scale SPEI (3 months): Youth Bulges and Civil Conflict Incidence: 2SLS-IV\relax }{table.caption.6}{}}
\@writefile{lot}{\contentsline {table}{\numberline {S1.7}{\ignorespaces \relax \fontsize  {10.95}{13.6}\selectfont  \abovedisplayskip 11\p@ plus3\p@ minus6\p@ \abovedisplayshortskip \z@ plus3\p@ \belowdisplayshortskip 6.5\p@ plus3.5\p@ minus3\p@ \def \leftmargin \leftmargini \topsep 6\p@ plus2\p@ minus2\p@ \parsep 3\p@ plus2\p@ minus\p@ \itemsep \parsep {\leftmargin \leftmargini \topsep 9\p@ plus3\p@ minus5\p@ \parsep 4.5\p@ plus2\p@ minus\p@ \itemsep \parsep }\belowdisplayskip \abovedisplayskip Robustness Time Scale SPEI (5 months): Youth Bulges and Civil Conflict Incidence: 2SLS-IV\relax }}{S6}{table.caption.7}}
\newlabel{TabTS5}{{S1.7}{S6}{\small Robustness Time Scale SPEI (5 months): Youth Bulges and Civil Conflict Incidence: 2SLS-IV\relax }{table.caption.7}{}}
\citation{Guggenberger2012}
\citation{VrielingEtAl2013}
\citation{VrielingEtAl2013}
\citation{Guggenberger2012}
\@writefile{toc}{\contentsline {subsection}{\numberline {S1.3}Use of alternative growing seasons}{S7}{subsection.A.3}}
\@writefile{lot}{\contentsline {table}{\numberline {S1.8}{\ignorespaces \relax \fontsize  {10.95}{13.6}\selectfont  \abovedisplayskip 11\p@ plus3\p@ minus6\p@ \abovedisplayshortskip \z@ plus3\p@ \belowdisplayshortskip 6.5\p@ plus3.5\p@ minus3\p@ \def \leftmargin \leftmargini \topsep 6\p@ plus2\p@ minus2\p@ \parsep 3\p@ plus2\p@ minus\p@ \itemsep \parsep {\leftmargin \leftmargini \topsep 9\p@ plus3\p@ minus5\p@ \parsep 4.5\p@ plus2\p@ minus\p@ \itemsep \parsep }\belowdisplayskip \abovedisplayskip Robustness Growing Season (All months included): Youth Bulges and Civil Conflict Incidence: 2SLS-IV\relax }}{S7}{table.caption.8}}
\newlabel{TabAGS}{{S1.8}{S7}{\small Robustness Growing Season (All months included): Youth Bulges and Civil Conflict Incidence: 2SLS-IV\relax }{table.caption.8}{}}
\@writefile{lot}{\contentsline {table}{\numberline {S1.9}{\ignorespaces \relax \fontsize  {10.95}{13.6}\selectfont  \abovedisplayskip 11\p@ plus3\p@ minus6\p@ \abovedisplayshortskip \z@ plus3\p@ \belowdisplayshortskip 6.5\p@ plus3.5\p@ minus3\p@ \def \leftmargin \leftmargini \topsep 6\p@ plus2\p@ minus2\p@ \parsep 3\p@ plus2\p@ minus\p@ \itemsep \parsep {\leftmargin \leftmargini \topsep 9\p@ plus3\p@ minus5\p@ \parsep 4.5\p@ plus2\p@ minus\p@ \itemsep \parsep }\belowdisplayskip \abovedisplayskip Robustness Growing Season \citep  {VrielingEtAl2013}: Youth Bulges and Civil Conflict Incidence: 2SLS-IV\relax }}{S8}{table.caption.9}}
\newlabel{TabVrieling}{{S1.9}{S8}{\small Robustness Growing Season \citep {VrielingEtAl2013}: Youth Bulges and Civil Conflict Incidence: 2SLS-IV\relax }{table.caption.9}{}}
\citation{Guggenberger2012}
\citation{Schneider2011}
\@writefile{toc}{\contentsline {subsection}{\numberline {S1.4}Use of rainfall as instrument}{S9}{subsection.A.4}}
\@writefile{lot}{\contentsline {table}{\numberline {S1.10}{\ignorespaces \relax \fontsize  {10.95}{13.6}\selectfont  \abovedisplayskip 11\p@ plus3\p@ minus6\p@ \abovedisplayshortskip \z@ plus3\p@ \belowdisplayshortskip 6.5\p@ plus3.5\p@ minus3\p@ \def \leftmargin \leftmargini \topsep 6\p@ plus2\p@ minus2\p@ \parsep 3\p@ plus2\p@ minus\p@ \itemsep \parsep {\leftmargin \leftmargini \topsep 9\p@ plus3\p@ minus5\p@ \parsep 4.5\p@ plus2\p@ minus\p@ \itemsep \parsep }\belowdisplayskip \abovedisplayskip Robustness Rainfall Instrument: Youth Bulges and Civil Conflict Incidence: 2SLS-IV\relax }}{S9}{table.caption.10}}
\newlabel{TabRain}{{S1.10}{S9}{\small Robustness Rainfall Instrument: Youth Bulges and Civil Conflict Incidence: 2SLS-IV\relax }{table.caption.10}{}}
\citation{Miguel2004}
\citation{Fearon2003}
\citation{PowellThyne2011}
\@writefile{toc}{\contentsline {subsection}{\numberline {S1.5}Alternative Coding and Data Sources}{S10}{subsection.A.5}}
\@writefile{lot}{\contentsline {table}{\numberline {S1.11}{\ignorespaces \relax \fontsize  {10.95}{13.6}\selectfont  \abovedisplayskip 11\p@ plus3\p@ minus6\p@ \abovedisplayshortskip \z@ plus3\p@ \belowdisplayshortskip 6.5\p@ plus3.5\p@ minus3\p@ \def \leftmargin \leftmargini \topsep 9\p@ plus3\p@ minus5\p@ \parsep 4.5\p@ plus2\p@ minus\p@ \itemsep \parsep {\leftmargin \leftmargini \topsep 9\p@ plus3\p@ minus5\p@ \parsep 4.5\p@ plus2\p@ minus\p@ \itemsep \parsep }\belowdisplayskip \abovedisplayskip Robustness 2SLS-IV - Alternative Onset/Offset Coding and Alternative Conflict Data\relax }}{S10}{table.caption.11}}
\newlabel{TaAp1}{{S1.11}{S10}{\small Robustness 2SLS-IV - Alternative Onset/Offset Coding and Alternative Conflict Data\relax }{table.caption.11}{}}
\citation{Guggenberger2012}
\citation{IPUMS}
\@writefile{toc}{\contentsline {subsection}{\numberline {S1.6}Use of relative youth bulge measure}{S11}{subsection.A.6}}
\@writefile{lot}{\contentsline {table}{\numberline {S1.12}{\ignorespaces \relax \fontsize  {10.95}{13.6}\selectfont  \abovedisplayskip 11\p@ plus3\p@ minus6\p@ \abovedisplayshortskip \z@ plus3\p@ \belowdisplayshortskip 6.5\p@ plus3.5\p@ minus3\p@ \def \leftmargin \leftmargini \topsep 6\p@ plus2\p@ minus2\p@ \parsep 3\p@ plus2\p@ minus\p@ \itemsep \parsep {\leftmargin \leftmargini \topsep 9\p@ plus3\p@ minus5\p@ \parsep 4.5\p@ plus2\p@ minus\p@ \itemsep \parsep }\belowdisplayskip \abovedisplayskip Robustness: Relative Youth Bulge Measure\relax }}{S11}{table.caption.12}}
\newlabel{tab:relative}{{S1.12}{S11}{\small Robustness: Relative Youth Bulge Measure\relax }{table.caption.12}{}}
\@writefile{lof}{\contentsline {figure}{\numberline {S1.1}{\ignorespaces {\relax \fontsize  {10}{12}\selectfont  \abovedisplayskip 10\p@ plus2\p@ minus5\p@ \abovedisplayshortskip \z@ plus3\p@ \belowdisplayshortskip 6\p@ plus3\p@ minus3\p@ \def \leftmargin \leftmargini \parsep 5\p@ plus2.5\p@ minus\p@ \topsep 10\p@ plus4\p@ minus6\p@ \itemsep 5\p@ plus2.5\p@ minus\p@ {\leftmargin \leftmargini \topsep 6\p@ plus2\p@ minus2\p@ \parsep 3\p@ plus2\p@ minus\p@ \itemsep \parsep }\belowdisplayskip \abovedisplayskip Graph depicts the effect of the individual birth year shocks $t-10$ to $t-24$ on the risk of conflict incidence (defined in Eq.(4)). The shaded represents the 90 percent confidence interval.}\relax }}{S11}{figure.caption.13}}
\newlabel{fig:coeff}{{S1.1}{S11}{{\footnotesize Graph depicts the effect of the individual birth year shocks $t-10$ to $t-24$ on the risk of conflict incidence (defined in Eq.(4)). The shaded represents the 90 percent confidence interval.}\relax }{figure.caption.13}{}}
\@writefile{lof}{\contentsline {figure}{\numberline {S1.2}{\ignorespaces {\relax \fontsize  {10}{12}\selectfont  \abovedisplayskip 10\p@ plus2\p@ minus5\p@ \abovedisplayshortskip \z@ plus3\p@ \belowdisplayshortskip 6\p@ plus3\p@ minus3\p@ \def \leftmargin \leftmargini \parsep 5\p@ plus2.5\p@ minus\p@ \topsep 10\p@ plus4\p@ minus6\p@ \itemsep 5\p@ plus2.5\p@ minus\p@ {\leftmargin \leftmargini \topsep 6\p@ plus2\p@ minus2\p@ \parsep 3\p@ plus2\p@ minus\p@ \itemsep \parsep }\belowdisplayskip \abovedisplayskip Graph depicts the effects of the age-group specific drought measures on the risk of conflict incidence (defined in Eq.(5)). The shaded represents the 90 percent confidence interval.}\relax }}{S12}{figure.caption.14}}
\newlabel{fig:coeffGroup}{{S1.2}{S12}{{\footnotesize Graph depicts the effects of the age-group specific drought measures on the risk of conflict incidence (defined in Eq.(5)). The shaded represents the 90 percent confidence interval.}\relax }{figure.caption.14}{}}
\@writefile{toc}{\contentsline {section}{\numberline {S2}IPUMS Data}{S12}{appendix.B}}
\newlabel{s:IPUMS}{{S2}{S12}{IPUMS Data}{appendix.B}{}}
\citation{ucdp}
\bibstyle{cje}
\bibdata{Bulge}
\bibcite{ucdp}{{1}{2012}{{Croicu and Sundberg}}{{Croicu and Sundberg}}}
\@writefile{toc}{\contentsline {subsection}{\numberline {S2.1}Effects of adjacent age groups at sub-national Level}{S13}{subsection.B.1}}
\@writefile{lot}{\contentsline {table}{\numberline {S2.1}{\ignorespaces Robustness Adjacent Age Groups: Mechanism\relax }}{S13}{table.caption.15}}
\newlabel{TabMec20}{{S2.1}{S13}{Robustness Adjacent Age Groups: Mechanism\relax }{table.caption.15}{}}
\bibcite{Fearon2003}{{2}{2003}{{Fearon and Laitin}}{{Fearon and Laitin}}}
\bibcite{Guggenberger2012}{{3}{2012}{{Guggenberger et al.}}{{Guggenberger, Kleibergen, Mavroeidis and Chen}}}
\bibcite{Miguel2004}{{4}{2004}{{Miguel et al.}}{{Miguel, Satyanath and Sergenti}}}
\bibcite{IPUMS}{{5}{2004}{{Minnesota Population Center}}{{Minnesota Population Center}}}
\bibcite{PowellThyne2011}{{6}{2011}{{Powell and Thyne}}{{Powell and Thyne}}}
\bibcite{Schneider2011}{{7}{2011}{{Schneider et al.}}{{Schneider, Becker, Finger, Meyer-Christoffer, Rudolf and Ziese}}}
\bibcite{VrielingEtAl2013}{{8}{2013}{{Vrieling et al.}}{{Vrieling, de~Leeuw and Said}}}
