# Supplementary material
Source: publisher figshare collection journal article supplement (https://sage.figshare.com/ndownloader/files/12974006)
Supplement: Supplementary file 1 [file 12974006 › OnlineAppendixJCR_16_0025.bbl]

\ifx\undefined\bysame
\newcommand{\bysame}{\leavevmode\hbox to\leftmargin{\hrulefill\,\,}}
\fi
\begin{thebibliography}{xx}

\harvarditem[Croicu and Sundberg]{Croicu and Sundberg}{2012}{ucdp}
Croicu, Mihai, and Ralph Sundberg (2012) `{UCDP GED Conflict Polygons dataset
  version 1.1-2011}.' Technical Report, {Department of Peace and Conflict
  Research, Uppsala University}

\harvarditem[Fearon and Laitin]{Fearon and Laitin}{2003}{Fearon2003}
Fearon, James~D., and David~D. Laitin (2003) `Ethnicity, insurgency, and civil
  war.' {\it American Political Science Review} 97(1),~75--90

\harvarditem[Guggenberger et al.]{Guggenberger, Kleibergen, Mavroeidis and
  Chen}{2012}{Guggenberger2012}
Guggenberger, Patrik, Frank Kleibergen, Sophocles Mavroeidis, and Linchun Chen
  (2012) `On the asymptotic sizes of subset anderson-rubin and lagrange
  multiplier tests in linear instrumental variables regression.' {\it
  Econometrica} 80(6),~2649--2666

\harvarditem[Miguel et al.]{Miguel, Satyanath and Sergenti}{2004}{Miguel2004}
Miguel, Edward, Shanker Satyanath, and Ernest Sergenti (2004) `Economic shocks
  and civil conflict: An instrumental variables approach.' {\it Journal of
  Political Economy} 112(4),~725--753

\harvarditem[{Minnesota Population Center}]{{Minnesota Population
  Center}}{2004}{IPUMS}
{Minnesota Population Center} (2004) {\it Integrated Public Use Microdata
  Series, International: Version 6.3} University of Minnesota (Minneapolis)

\harvarditem[Powell and Thyne]{Powell and Thyne}{2011}{PowellThyne2011}
Powell, Jonathan~M, and Clayton~L Thyne (2011) `Global instances of coups from
  1950 to 2010: A new dataset.' {\it Journal of Peace Research} 48(2),~249--259

\harvarditem[Schneider et al.]{Schneider, Becker, Finger, Meyer-Christoffer,
  Rudolf and Ziese}{2011}{Schneider2011}
Schneider, Udo, Andreas Becker, Peter Finger, Anja Meyer-Christoffer, Bruno
  Rudolf, and Markus Ziese (2011) `{GPCC} full data reanalysis version 6.0 at
  1.0\degree: Monthly land-surface precipitation from rain-gauges built on
  {GTS}-based and historic data.'

\harvarditem[Vrieling et al.]{Vrieling, de~Leeuw and
  Said}{2013}{VrielingEtAl2013}
Vrieling, Anton, Jan de~Leeuw, and Mohammed~Y. Said (2013) `Length of growing
  period over africa: Variability and trends from 30 years of ndvi time
  series.' {\it Remote Sensing} 5(2),~982

\end{thebibliography}
