# Supplementary material
Source: publisher figshare collection journal article supplement (https://sage.figshare.com/ndownloader/files/12974006)
Supplement: Supplementary file 1 [file 12974006 › OnlineAppendixJCR_16_0025.blg]

This is BibTeX, Version 0.99d (TeX Live 2016)
Capacity: max_strings=35307, hash_size=35307, hash_prime=30011
The top-level auxiliary file: OnlineAppendixJCR_16_0025.aux
The style file: cje.bst
Reallocated singl_function (elt_size=4) to 100 items from 50.
Database file #1: Bulge.bib
Warning--empty journal in Schneider2011
You've used 8 entries,
            2940 wiz_defined-function locations,
            708 strings with 5838 characters,
and the built_in function-call counts, 5384 in all, are:
= -- 886
> -- 314
< -- 46
+ -- 92
- -- 92
* -- 348
:= -- 1179
add.period$ -- 6
call.type$ -- 8
change.case$ -- 63
chr.to.int$ -- 8
cite$ -- 9
duplicate$ -- 73
empty$ -- 211
format.name$ -- 120
if$ -- 1343
int.to.chr$ -- 1
int.to.str$ -- 0
missing$ -- 6
newline$ -- 30
num.names$ -- 48
pop$ -- 49
preamble$ -- 1
purify$ -- 64
quote$ -- 0
skip$ -- 0
stack$ -- 0
substring$ -- 181
swap$ -- 13
text.length$ -- 0
text.prefix$ -- 0
top$ -- 0
type$ -- 32
warning$ -- 1
while$ -- 37
width$ -- 0
write$ -- 123
(There was 1 warning)
