# Supplementary material
Source: publisher figshare collection journal article supplement (https://sage.figshare.com/ndownloader/files/12974006)
Supplement: Supplementary file 1 [file 12974006 › OnlineAppendixJCR_16_0025.fdb_latexmk]

# Fdb version 3
["bibtex OnlineAppendixJCR_16_0025"] 1491644153 "OnlineAppendixJCR_16_0025.aux" "OnlineAppendixJCR_16_0025.bbl" "OnlineAppendixJCR_16_0025" 1491644155
  "/usr/local/texlive/2016/texmf-dist/bibtex/bst/economic/cje.bst" 1389482635 25856 fa175f368dde9e44a822384a9fad624a ""
  "Bulge.bib" 1479728080 56561 d2487dd274ac50e697f3b72698eda80a ""
  "OnlineAppendixJCR_16_0025.aux" 1491644154 14150 e82a14875cbedb40eab1526188ad3e3a ""
  "OnlineAppendixJCR_16_0025.bcf" 0 -1 0 ""
  (generated)
  "OnlineAppendixJCR_16_0025.bbl"
  "OnlineAppendixJCR_16_0025.blg"
["pdflatex"] 1491644153 "OnlineAppendixJCR_16_0025.tex" "OnlineAppendixJCR_16_0025.pdf" "OnlineAppendixJCR_16_0025" 1491644155
  "/usr/local/texlive/2016/texmf-dist/fonts/enc/dvips/cm-super/cm-super-t1.enc" 1136849721 2971 def0b6c1f0b107b3b936def894055589 ""
  "/usr/local/texlive/2016/texmf-dist/fonts/map/fontname/texfonts.map" 1272929888 3287 e6b82fe08f5336d4d5ebc73fb1152e87 ""
  "/usr/local/texlive/2016/texmf-dist/fonts/tfm/jknappen/ec/ecbx0800.tfm" 1136768653 3584 269b66e921ba58750c12f7f1c8ea3ebd ""
  "/usr/local/texlive/2016/texmf-dist/fonts/tfm/jknappen/ec/ecbx1440.tfm" 1136768653 3584 13049b61b922a28b158a38aeff75ee9b ""
  "/usr/local/texlive/2016/texmf-dist/fonts/tfm/jknappen/ec/ecbx1728.tfm" 1136768653 3584 ad49a18d8515beef6d92d4d3f197d0fd ""
  "/usr/local/texlive/2016/texmf-dist/fonts/tfm/jknappen/ec/ecbx2488.tfm" 1136768653 3584 0181dbc4d429c3ba4e30feba37b5df96 ""
  "/usr/local/texlive/2016/texmf-dist/fonts/tfm/jknappen/ec/eccc1440.tfm" 1136768653 3072 f2bcba5ec52607af3501d45108193ff5 ""
  "/usr/local/texlive/2016/texmf-dist/fonts/tfm/jknappen/ec/ecrm0800.tfm" 1136768653 3584 49064b465390a8e316a3c8417a050403 ""
  "/usr/local/texlive/2016/texmf-dist/fonts/tfm/jknappen/ec/ecrm1000.tfm" 1136768653 3584 adb004a0c8e7c46ee66cad73671f37b4 ""
  "/usr/local/texlive/2016/texmf-dist/fonts/tfm/jknappen/ec/ecrm1095.tfm" 1136768653 3584 929cdff2b7a8c11bd4d49fd68cb0ae70 ""
  "/usr/local/texlive/2016/texmf-dist/fonts/tfm/jknappen/ec/ecrm1200.tfm" 1136768653 3584 f80ddd985bd00e29e9a6047ebd9d4781 ""
  "/usr/local/texlive/2016/texmf-dist/fonts/tfm/jknappen/ec/ecrm1440.tfm" 1136768653 3584 3169d30142b88a27d4ab0e3468e963a2 ""
  "/usr/local/texlive/2016/texmf-dist/fonts/tfm/jknappen/ec/ecrm1728.tfm" 1136768653 3584 3c76ccb63eda935a68ba65ba9da29f1a ""
  "/usr/local/texlive/2016/texmf-dist/fonts/tfm/jknappen/ec/ecrm2488.tfm" 1136768653 3584 406ad7b70d9a41f7833f92b6313150c8 ""
  "/usr/local/texlive/2016/texmf-dist/fonts/tfm/jknappen/ec/ecti1200.tfm" 1136768653 3072 8b5a64dc91775463bc95e2d818524028 ""
  "/usr/local/texlive/2016/texmf-dist/fonts/tfm/jknappen/ec/ecxc2488.tfm" 1136768653 3072 bed226f97a32eeca8e840082e205c6ac ""
  "/usr/local/texlive/2016/texmf-dist/fonts/tfm/public/amsfonts/cmextra/cmex7.tfm" 1246382020 1004 54797486969f23fa377b128694d548df ""
  "/usr/local/texlive/2016/texmf-dist/fonts/tfm/public/amsfonts/cmextra/cmex8.tfm" 1246382020 988 bdf658c3bfc2d96d3c8b02cfc1c94c20 ""
  "/usr/local/texlive/2016/texmf-dist/fonts/tfm/public/amsfonts/symbols/msam10.tfm" 1246382020 916 f87d7c45f9c908e672703b83b72241a3 ""
  "/usr/local/texlive/2016/texmf-dist/fonts/tfm/public/amsfonts/symbols/msam5.tfm" 1246382020 924 9904cf1d39e9767e7a3622f2a125a565 ""
  "/usr/local/texlive/2016/texmf-dist/fonts/tfm/public/amsfonts/symbols/msam7.tfm" 1246382020 928 2dc8d444221b7a635bb58038579b861a ""
  "/usr/local/texlive/2016/texmf-dist/fonts/tfm/public/amsfonts/symbols/msbm10.tfm" 1246382020 908 2921f8a10601f252058503cc6570e581 ""
  "/usr/local/texlive/2016/texmf-dist/fonts/tfm/public/amsfonts/symbols/msbm5.tfm" 1246382020 940 75ac932a52f80982a9f8ea75d03a34cf ""
  "/usr/local/texlive/2016/texmf-dist/fonts/tfm/public/amsfonts/symbols/msbm7.tfm" 1246382020 940 228d6584342e91276bf566bcf9716b83 ""
  "/usr/local/texlive/2016/texmf-dist/fonts/tfm/public/cm/cmex10.tfm" 1136768653 992 662f679a0b3d2d53c1b94050fdaa3f50 ""
  "/usr/local/texlive/2016/texmf-dist/fonts/tfm/public/cm/cmmi10.tfm" 1136768653 1528 abec98dbc43e172678c11b3b9031252a ""
  "/usr/local/texlive/2016/texmf-dist/fonts/tfm/public/cm/cmmi12.tfm" 1136768653 1524 4414a8315f39513458b80dfc63bff03a ""
  "/usr/local/texlive/2016/texmf-dist/fonts/tfm/public/cm/cmmi6.tfm" 1136768653 1512 f21f83efb36853c0b70002322c1ab3ad ""
  "/usr/local/texlive/2016/texmf-dist/fonts/tfm/public/cm/cmmi8.tfm" 1136768653 1520 eccf95517727cb11801f4f1aee3a21b4 ""
  "/usr/local/texlive/2016/texmf-dist/fonts/tfm/public/cm/cmr10.tfm" 1136768653 1296 45809c5a464d5f32c8f98ba97c1bb47f ""
  "/usr/local/texlive/2016/texmf-dist/fonts/tfm/public/cm/cmr12.tfm" 1136768653 1288 655e228510b4c2a1abe905c368440826 ""
  "/usr/local/texlive/2016/texmf-dist/fonts/tfm/public/cm/cmr6.tfm" 1136768653 1300 b62933e007d01cfd073f79b963c01526 ""
  "/usr/local/texlive/2016/texmf-dist/fonts/tfm/public/cm/cmr8.tfm" 1136768653 1292 21c1c5bfeaebccffdb478fd231a0997d ""
  "/usr/local/texlive/2016/texmf-dist/fonts/tfm/public/cm/cmsy10.tfm" 1136768653 1124 6c73e740cf17375f03eec0ee63599741 ""
  "/usr/local/texlive/2016/texmf-dist/fonts/tfm/public/cm/cmsy6.tfm" 1136768653 1116 933a60c408fc0a863a92debe84b2d294 ""
  "/usr/local/texlive/2016/texmf-dist/fonts/tfm/public/cm/cmsy8.tfm" 1136768653 1120 8b7d695260f3cff42e636090a8002094 ""
  "/usr/local/texlive/2016/texmf-dist/fonts/tfm/public/latex-fonts/lasy10.tfm" 1136768653 520 82a3d37183f34b6eb363a161dfc002c2 ""
  "/usr/local/texlive/2016/texmf-dist/fonts/tfm/public/latex-fonts/lasy5.tfm" 1136768653 520 d082ac03a1087bc1ec2a06e24a9f68c0 ""
  "/usr/local/texlive/2016/texmf-dist/fonts/tfm/public/latex-fonts/lasy6.tfm" 1136768653 520 4889cce2180234b97cad636b6039c722 ""
  "/usr/local/texlive/2016/texmf-dist/fonts/tfm/public/latex-fonts/lasy7.tfm" 1136768653 520 a74c6ed8cb48679fdc3ea874d9d34a7e ""
  "/usr/local/texlive/2016/texmf-dist/fonts/tfm/public/latex-fonts/lasy8.tfm" 1136768653 520 7bb3abb160b19e0ed6ac404bb59052b7 ""
  "/usr/local/texlive/2016/texmf-dist/fonts/type1/public/amsfonts/cm/cmmi10.pfb" 1248133631 36299 5f9df58c2139e7edcf37c8fca4bd384d ""
  "/usr/local/texlive/2016/texmf-dist/fonts/type1/public/amsfonts/cm/cmmi6.pfb" 1248133631 37166 8ab3487cbe3ab49ebce74c29ea2418db ""
  "/usr/local/texlive/2016/texmf-dist/fonts/type1/public/amsfonts/cm/cmmi7.pfb" 1248133631 36281 c355509802a035cadc5f15869451dcee ""
  "/usr/local/texlive/2016/texmf-dist/fonts/type1/public/amsfonts/cm/cmmi8.pfb" 1248133631 35469 70d41d2b9ea31d5d813066df7c99281c ""
  "/usr/local/texlive/2016/texmf-dist/fonts/type1/public/amsfonts/cm/cmr10.pfb" 1248133631 35752 024fb6c41858982481f6968b5fc26508 ""
  "/usr/local/texlive/2016/texmf-dist/fonts/type1/public/amsfonts/cm/cmr6.pfb" 1248133631 32734 69e00a6b65cedb993666e42eedb3d48f ""
  "/usr/local/texlive/2016/texmf-dist/fonts/type1/public/amsfonts/cm/cmr7.pfb" 1248133631 32762 224316ccc9ad3ca0423a14971cfa7fc1 ""
  "/usr/local/texlive/2016/texmf-dist/fonts/type1/public/amsfonts/cm/cmr8.pfb" 1248133631 32726 0a1aea6fcd6468ee2cf64d891f5c43c8 ""
  "/usr/local/texlive/2016/texmf-dist/fonts/type1/public/amsfonts/cm/cmsy10.pfb" 1248133631 32569 5e5ddc8df908dea60932f3c484a54c0d ""
  "/usr/local/texlive/2016/texmf-dist/fonts/type1/public/amsfonts/cm/cmsy6.pfb" 1248133631 32587 1788b0c1c5b39540c96f5e42ccd6dae8 ""
  "/usr/local/texlive/2016/texmf-dist/fonts/type1/public/amsfonts/cm/cmsy7.pfb" 1248133631 32716 08e384dc442464e7285e891af9f45947 ""
  "/usr/local/texlive/2016/texmf-dist/fonts/type1/public/amsfonts/cm/cmsy8.pfb" 1248133631 32626 4f5c1b83753b1dd3a97d1b399a005b4b ""
  "/usr/local/texlive/2016/texmf-dist/fonts/type1/public/cm-super/sfbx0800.pfb" 1215737283 164252 e0fa571e05777bac365ddd5bdf6e8800 ""
  "/usr/local/texlive/2016/texmf-dist/fonts/type1/public/cm-super/sfbx1440.pfb" 1215737283 135942 859a90cad7494a1e79c94baf546d7de5 ""
  "/usr/local/texlive/2016/texmf-dist/fonts/type1/public/cm-super/sfbx1728.pfb" 1215737283 139826 9213617a7cb78635fc326b859c0b2273 ""
  "/usr/local/texlive/2016/texmf-dist/fonts/type1/public/cm-super/sfcc1440.pfb" 1215737283 110032 35e0196b03e20c9bc327f34ecd2026f9 ""
  "/usr/local/texlive/2016/texmf-dist/fonts/type1/public/cm-super/sfrm0800.pfb" 1215737283 164227 3df942b4ff2124425d8fb1b6d3e01c7a ""
  "/usr/local/texlive/2016/texmf-dist/fonts/type1/public/cm-super/sfrm1000.pfb" 1215737283 138258 6525c253f16cededa14c7fd0da7f67b2 ""
  "/usr/local/texlive/2016/texmf-dist/fonts/type1/public/cm-super/sfrm1095.pfb" 1215737283 145929 f25e56369a345c4ff583b067cd87ce8e ""
  "/usr/local/texlive/2016/texmf-dist/fonts/type1/public/cm-super/sfrm1200.pfb" 1215737283 136101 f533469f523533d38317ab5729d00c8a ""
  "/usr/local/texlive/2016/texmf-dist/fonts/type1/public/cm-super/sfti1200.pfb" 1215737283 198221 ca5aa71411090ef358a6cc78b7458365 ""
  "/usr/local/texlive/2016/texmf-dist/fonts/type1/public/cm-super/sfxc2488.pfb" 1215737283 115470 5a4c8e877500939b73a813952213a627 ""
  "/usr/local/texlive/2016/texmf-dist/tex/context/base/mkii/supp-pdf.mkii" 1461363279 71627 94eb9990bed73c364d7f53f960cc8c5b ""
  "/usr/local/texlive/2016/texmf-dist/tex/generic/ifxetex/ifxetex.sty" 1284331290 1458 43ab4710dc82f3edeabecd0d099626b2 ""
  "/usr/local/texlive/2016/texmf-dist/tex/generic/oberdiek/gettitlestring.sty" 1463608860 8237 3b62ef1f7e2c23a328c814b3893bc11f ""
  "/usr/local/texlive/2016/texmf-dist/tex/generic/oberdiek/hobsub-generic.sty" 1463608860 184907 0684df819a7b0db4d40278012ce92791 ""
  "/usr/local/texlive/2016/texmf-dist/tex/generic/oberdiek/hobsub-hyperref.sty" 1463608860 70752 b461cacad0518ee92bfe2446909a53a8 ""
  "/usr/local/texlive/2016/texmf-dist/tex/generic/oberdiek/ifpdf.sty" 1463348357 1226 01a89dfef361f60ae7df13cd2946bc16 ""
  "/usr/local/texlive/2016/texmf-dist/tex/generic/oberdiek/ifvtex.sty" 1463608860 6797 90b7f83b0ad46826bc16058b1e3d48df ""
  "/usr/local/texlive/2016/texmf-dist/tex/generic/oberdiek/infwarerr.sty" 1463608860 8253 473e0e41f9adadb1977e8631b8f72ea6 ""
  "/usr/local/texlive/2016/texmf-dist/tex/generic/oberdiek/ltxcmds.sty" 1463608860 18425 5b3c0c59d76fac78978b5558e83c1f36 ""
  "/usr/local/texlive/2016/texmf-dist/tex/latex/amscls/amsthm.sty" 1428861406 12225 3cca0d18522255979a1047206228b9d0 ""
  "/usr/local/texlive/2016/texmf-dist/tex/latex/amsfonts/amsfonts.sty" 1359763108 5949 3f3fd50a8cc94c3d4cbf4fc66cd3df1c ""
  "/usr/local/texlive/2016/texmf-dist/tex/latex/amsfonts/umsa.fd" 1359763108 961 6518c6525a34feb5e8250ffa91731cff ""
  "/usr/local/texlive/2016/texmf-dist/tex/latex/amsfonts/umsb.fd" 1359763108 961 d02606146ba5601b5645f987c92e6193 ""
  "/usr/local/texlive/2016/texmf-dist/tex/latex/amsmath/amsbsy.sty" 1456875012 2210 5c54ab129b848a5071554186d0168766 ""
  "/usr/local/texlive/2016/texmf-dist/tex/latex/amsmath/amsgen.sty" 1456875012 4160 c115536cf8d4ff25aa8c1c9bc4ecb79a ""
  "/usr/local/texlive/2016/texmf-dist/tex/latex/amsmath/amsmath.sty" 1459635588 82019 58dd7b022876c1d593cd2135c441946d ""
  "/usr/local/texlive/2016/texmf-dist/tex/latex/amsmath/amsopn.sty" 1459635588 4115 318a66090112f3aa3f415aeb6fe8540f ""
  "/usr/local/texlive/2016/texmf-dist/tex/latex/amsmath/amstext.sty" 1456875012 2431 fe3078ec12fc30287f568596f8e0b948 ""
  "/usr/local/texlive/2016/texmf-dist/tex/latex/appendix/appendix.sty" 1252539595 8526 d0d9b5e2dd0c996c69c3bd05eb25b943 ""
  "/usr/local/texlive/2016/texmf-dist/tex/latex/base/article.cls" 1459635588 19821 310da678527a7dfe2a02c88af38079b7 ""
  "/usr/local/texlive/2016/texmf-dist/tex/latex/base/fontenc.sty" 1454284088 4572 634fcdf7e9df867d6d54f84638930408 ""
  "/usr/local/texlive/2016/texmf-dist/tex/latex/base/ifthen.sty" 1454284088 5159 a08c9bbd48fc492f15b22e458bef961f ""
  "/usr/local/texlive/2016/texmf-dist/tex/latex/base/latexsym.sty" 1454284088 2854 d9a09e80ec53a1710adc74c0e8300370 ""
  "/usr/local/texlive/2016/texmf-dist/tex/latex/base/size12.clo" 1459635588 8303 1d67e16498f00f63da792fab169302fc ""
  "/usr/local/texlive/2016/texmf-dist/tex/latex/base/t1enc.def" 1454284088 9927 925418b4e40d02671b4728df100ec5ef ""
  "/usr/local/texlive/2016/texmf-dist/tex/latex/base/ulasy.fd" 1454284088 2020 d5c6fbbe41610194529ecfc3e463c559 ""
  "/usr/local/texlive/2016/texmf-dist/tex/latex/booktabs/booktabs.sty" 1462233275 5869 94335281ffcab47f341cf07ea8220e30 ""
  "/usr/local/texlive/2016/texmf-dist/tex/latex/caption/caption.sty" 1456094605 66233 8b81cfab95a1f8fc2f0f6c89415b087a ""
  "/usr/local/texlive/2016/texmf-dist/tex/latex/caption/caption3.sty" 1456094605 64437 7aae26f62358cb5be7cae9d865fab5b8 ""
  "/usr/local/texlive/2016/texmf-dist/tex/latex/chngcntr/chngcntr.sty" 1252025909 4063 effd8d02c8357a7a1b0c045c4e25e292 ""
  "/usr/local/texlive/2016/texmf-dist/tex/latex/endnotes/endnotes.sty" 1267058357 14473 997ac05a8341a5a211fef7e19b09a4e8 ""
  "/usr/local/texlive/2016/texmf-dist/tex/latex/float/float.sty" 1137110151 6749 16d2656a1984957e674b149555f1ea1d ""
  "/usr/local/texlive/2016/texmf-dist/tex/latex/geometry/geometry.sty" 1284422013 40502 e003406220954b0716679d7928aedd8a ""
  "/usr/local/texlive/2016/texmf-dist/tex/latex/graphics-cfg/graphics.cfg" 1459978653 3103 f32642b1cd56c010cdfb6545539b7f0b ""
  "/usr/local/texlive/2016/texmf-dist/tex/latex/graphics/epsfig.sty" 1428932888 3388 93cb6d9fa64f9566276657fd15254187 ""
  "/usr/local/texlive/2016/texmf-dist/tex/latex/graphics/graphics.sty" 1462915952 14391 bd64a9e5d07473b936423b5f3280ed2c ""
  "/usr/local/texlive/2016/texmf-dist/tex/latex/graphics/graphicx.sty" 1428932888 8125 557ab9f1bfa80d369fb45a914aa8a3b4 ""
  "/usr/local/texlive/2016/texmf-dist/tex/latex/graphics/keyval.sty" 1428932888 2594 d18d5e19aa8239cf867fa670c556d2e9 ""
  "/usr/local/texlive/2016/texmf-dist/tex/latex/graphics/lscape.sty" 1428932888 1757 94e21888eaf2391b7bbc441045c70c12 ""
  "/usr/local/texlive/2016/texmf-dist/tex/latex/graphics/trig.sty" 1454284088 3980 0a268fbfda01e381fa95821ab13b6aee ""
  "/usr/local/texlive/2016/texmf-dist/tex/latex/hyperref/hpdftex.def" 1462835572 51837 3504c3bd905d546a7e98cebbb2cf6475 ""
  "/usr/local/texlive/2016/texmf-dist/tex/latex/hyperref/hyperref.sty" 1462835572 231855 3b828733a8d4157331c2822d6ca625a9 ""
  "/usr/local/texlive/2016/texmf-dist/tex/latex/hyperref/nameref.sty" 1351899753 12847 25b617d63258c4f72870c883493a3cf8 ""
  "/usr/local/texlive/2016/texmf-dist/tex/latex/hyperref/pd1enc.def" 1462835572 14005 0627be14688b9bcdd822468e0ec3cef1 ""
  "/usr/local/texlive/2016/texmf-dist/tex/latex/latexconfig/epstopdf-sys.cfg" 1279039959 678 4792914a8f45be57bb98413425e4c7af ""
  "/usr/local/texlive/2016/texmf-dist/tex/latex/latexconfig/hyperref.cfg" 1254097189 235 6031e5765137be07eed51a510b2b8fb7 ""
  "/usr/local/texlive/2016/texmf-dist/tex/latex/multirow/multirow.sty" 1137110401 7374 f7c1f13fc632dd5c9b220a247d233082 ""
  "/usr/local/texlive/2016/texmf-dist/tex/latex/natbib/natbib.sty" 1291685959 45456 1c8843383c0bd05870c45fa0ebea6cc2 ""
  "/usr/local/texlive/2016/texmf-dist/tex/latex/oberdiek/auxhook.sty" 1463608860 3834 4363110eb0ef1eb2b71c8fcbcdb6c357 ""
  "/usr/local/texlive/2016/texmf-dist/tex/latex/oberdiek/epstopdf-base.sty" 1463608860 12095 5337833c991d80788a43d3ce26bd1c46 ""
  "/usr/local/texlive/2016/texmf-dist/tex/latex/oberdiek/grfext.sty" 1463608860 7075 2fe3d848bba95f139de11ded085e74aa ""
  "/usr/local/texlive/2016/texmf-dist/tex/latex/oberdiek/kvoptions.sty" 1463608860 22417 1d9df1eb66848aa31b18a593099cf45c ""
  "/usr/local/texlive/2016/texmf-dist/tex/latex/oberdiek/pdflscape.sty" 1463348357 6688 c84de1eae6cda82865a6d3d09e339ec9 ""
  "/usr/local/texlive/2016/texmf-dist/tex/latex/oberdiek/rerunfilecheck.sty" 1463608860 9581 023642318cef9f4677efe364de1e2a27 ""
  "/usr/local/texlive/2016/texmf-dist/tex/latex/pdftex-def/pdftex.def" 1306616590 55368 3c8a0d99822330f2dfabc0dfb09ce897 ""
  "/usr/local/texlive/2016/texmf-dist/tex/latex/relsize/relsize.sty" 1369619135 15542 c4cc3164fe24f2f2fbb06eb71b1da4c4 ""
  "/usr/local/texlive/2016/texmf-dist/tex/latex/setspace/setspace.sty" 1324344192 22913 a27d7908fc6f0385466454a966a316eb ""
  "/usr/local/texlive/2016/texmf-dist/tex/latex/titling/titling.sty" 1252107870 7358 95ac619994bd30d405a74f3eca431c84 ""
  "/usr/local/texlive/2016/texmf-dist/tex/latex/tools/enumerate.sty" 1454284088 3467 d39e40f25d5fd2b3b49a58d155063dd6 ""
  "/usr/local/texlive/2016/texmf-dist/tex/latex/units/nicefrac.sty" 1137111039 4029 0462ee5ab265cf59dc15a41a3b883101 ""
  "/usr/local/texlive/2016/texmf-dist/tex/latex/url/url.sty" 1388531844 12796 8edb7d69a20b857904dd0ea757c14ec9 ""
  "/usr/local/texlive/2016/texmf-dist/tex/latex/was/gensymb.sty" 1137111079 4612 29d19942d7123701aa6a3876b9ba11b1 ""
  "/usr/local/texlive/2016/texmf-dist/web2c/texmf.cnf" 1463093894 31953 b9489e6e586f798610c60aec1f5ec548 ""
  "/usr/local/texlive/2016/texmf-var/fonts/map/pdftex/updmap/pdftex.map" 1469218558 1888048 f2c5faed5981a516f406b2ccc20bff71 ""
  "/usr/local/texlive/2016/texmf-var/web2c/pdftex/pdflatex.fmt" 1469218578 3873397 1bcd5600ac34ff7ab72937b61ebc65ce ""
  "/usr/local/texlive/2016/texmf.cnf" 1463979140 577 2938757e76f31531e65cc647e3507693 ""
  "CoeffPlotAgeGroup.pdf" 1479394932 104591 5772c86da786e0ac304205aed5339fbc ""
  "CoeffShockCI.pdf" 1479394979 164389 cdd8d87812b1b70d973661ebe1ad1d4c ""
  "OnlineAppendixJCR_16_0025.aux" 1491644154 14150 e82a14875cbedb40eab1526188ad3e3a ""
  "OnlineAppendixJCR_16_0025.bbl" 1491644153 2376 d7128eb9da391f4675feedfb3dec2471 "bibtex OnlineAppendixJCR_16_0025"
  "OnlineAppendixJCR_16_0025.out" 1491644154 733 ec0fe3df44a50da95fd9a67ee6807be2 ""
  "OnlineAppendixJCR_16_0025.tex" 1491644155 43372 1ab62d5e5767c8bc0712a7fdb64dfcf6 ""
  (generated)
  "OnlineAppendixJCR_16_0025.pdf"
  "OnlineAppendixJCR_16_0025.out"
  "OnlineAppendixJCR_16_0025.log"
  "OnlineAppendixJCR_16_0025.aux"
