# Supplementary material
Source: publisher figshare collection journal article supplement (https://sage.figshare.com/ndownloader/files/12974006)
Supplement: Supplementary file 1 [file 12974006 › OnlineAppendixJCR_16_0025.fls]

PWD /Users/bistgaun/Dropbox/Uni/MarkusYB/YBRRCR/JCR_16_0025/tex
INPUT /usr/local/texlive/2016/texmf.cnf
INPUT /usr/local/texlive/2016/texmf-dist/web2c/texmf.cnf
INPUT /usr/local/texlive/2016/texmf-var/web2c/pdftex/pdflatex.fmt
INPUT OnlineAppendixJCR_16_0025.tex
OUTPUT OnlineAppendixJCR_16_0025.log
INPUT /usr/local/texlive/2016/texmf-dist/tex/latex/base/article.cls
INPUT /usr/local/texlive/2016/texmf-dist/tex/latex/base/article.cls
INPUT /usr/local/texlive/2016/texmf-dist/tex/latex/base/size12.clo
INPUT /usr/local/texlive/2016/texmf-dist/tex/latex/base/size12.clo
INPUT /usr/local/texlive/2016/texmf-dist/fonts/map/fontname/texfonts.map
INPUT /usr/local/texlive/2016/texmf-dist/fonts/tfm/public/cm/cmr12.tfm
INPUT /usr/local/texlive/2016/texmf-dist/tex/latex/multirow/multirow.sty
INPUT /usr/local/texlive/2016/texmf-dist/tex/latex/multirow/multirow.sty
INPUT /usr/local/texlive/2016/texmf-dist/tex/latex/base/fontenc.sty
INPUT /usr/local/texlive/2016/texmf-dist/tex/latex/base/fontenc.sty
INPUT /usr/local/texlive/2016/texmf-dist/tex/latex/base/t1enc.def
INPUT /usr/local/texlive/2016/texmf-dist/tex/latex/base/t1enc.def
INPUT /usr/local/texlive/2016/texmf-dist/fonts/tfm/jknappen/ec/ecrm1200.tfm
INPUT /usr/local/texlive/2016/texmf-dist/tex/latex/amsfonts/amsfonts.sty
INPUT /usr/local/texlive/2016/texmf-dist/tex/latex/amsfonts/amsfonts.sty
INPUT /usr/local/texlive/2016/texmf-dist/tex/latex/amscls/amsthm.sty
INPUT /usr/local/texlive/2016/texmf-dist/tex/latex/amscls/amsthm.sty
INPUT /usr/local/texlive/2016/texmf-dist/tex/latex/amsmath/amsmath.sty
INPUT /usr/local/texlive/2016/texmf-dist/tex/latex/amsmath/amsmath.sty
INPUT /usr/local/texlive/2016/texmf-dist/tex/latex/amsmath/amstext.sty
INPUT /usr/local/texlive/2016/texmf-dist/tex/latex/amsmath/amstext.sty
INPUT /usr/local/texlive/2016/texmf-dist/tex/latex/amsmath/amsgen.sty
INPUT /usr/local/texlive/2016/texmf-dist/tex/latex/amsmath/amsgen.sty
INPUT /usr/local/texlive/2016/texmf-dist/tex/latex/amsmath/amsbsy.sty
INPUT /usr/local/texlive/2016/texmf-dist/tex/latex/amsmath/amsbsy.sty
INPUT /usr/local/texlive/2016/texmf-dist/tex/latex/amsmath/amsopn.sty
INPUT /usr/local/texlive/2016/texmf-dist/tex/latex/amsmath/amsopn.sty
INPUT /usr/local/texlive/2016/texmf-dist/tex/latex/relsize/relsize.sty
INPUT /usr/local/texlive/2016/texmf-dist/tex/latex/relsize/relsize.sty
INPUT /usr/local/texlive/2016/texmf-dist/tex/latex/base/latexsym.sty
INPUT /usr/local/texlive/2016/texmf-dist/tex/latex/base/latexsym.sty
INPUT /usr/local/texlive/2016/texmf-dist/tex/latex/tools/enumerate.sty
INPUT /usr/local/texlive/2016/texmf-dist/tex/latex/tools/enumerate.sty
INPUT /usr/local/texlive/2016/texmf-dist/tex/latex/natbib/natbib.sty
INPUT /usr/local/texlive/2016/texmf-dist/tex/latex/natbib/natbib.sty
INPUT /usr/local/texlive/2016/texmf-dist/tex/latex/endnotes/endnotes.sty
INPUT /usr/local/texlive/2016/texmf-dist/tex/latex/endnotes/endnotes.sty
INPUT /usr/local/texlive/2016/texmf-dist/tex/latex/oberdiek/pdflscape.sty
INPUT /usr/local/texlive/2016/texmf-dist/tex/latex/oberdiek/pdflscape.sty
INPUT /usr/local/texlive/2016/texmf-dist/tex/latex/graphics/lscape.sty
INPUT /usr/local/texlive/2016/texmf-dist/tex/latex/graphics/lscape.sty
INPUT /usr/local/texlive/2016/texmf-dist/tex/latex/graphics/graphics.sty
INPUT /usr/local/texlive/2016/texmf-dist/tex/latex/graphics/graphics.sty
INPUT /usr/local/texlive/2016/texmf-dist/tex/latex/graphics/trig.sty
INPUT /usr/local/texlive/2016/texmf-dist/tex/latex/graphics/trig.sty
INPUT /usr/local/texlive/2016/texmf-dist/tex/latex/graphics-cfg/graphics.cfg
INPUT /usr/local/texlive/2016/texmf-dist/tex/latex/graphics-cfg/graphics.cfg
INPUT /usr/local/texlive/2016/texmf-dist/tex/latex/pdftex-def/pdftex.def
INPUT /usr/local/texlive/2016/texmf-dist/tex/latex/pdftex-def/pdftex.def
INPUT /usr/local/texlive/2016/texmf-dist/tex/generic/oberdiek/infwarerr.sty
INPUT /usr/local/texlive/2016/texmf-dist/tex/generic/oberdiek/infwarerr.sty
INPUT /usr/local/texlive/2016/texmf-dist/tex/generic/oberdiek/ltxcmds.sty
INPUT /usr/local/texlive/2016/texmf-dist/tex/generic/oberdiek/ltxcmds.sty
INPUT /usr/local/texlive/2016/texmf-dist/tex/generic/oberdiek/ifpdf.sty
INPUT /usr/local/texlive/2016/texmf-dist/tex/generic/oberdiek/ifpdf.sty
INPUT /usr/local/texlive/2016/texmf-dist/tex/generic/ifxetex/ifxetex.sty
INPUT /usr/local/texlive/2016/texmf-dist/tex/generic/ifxetex/ifxetex.sty
INPUT /usr/local/texlive/2016/texmf-dist/tex/latex/appendix/appendix.sty
INPUT /usr/local/texlive/2016/texmf-dist/tex/latex/appendix/appendix.sty
INPUT /usr/local/texlive/2016/texmf-dist/tex/latex/units/nicefrac.sty
INPUT /usr/local/texlive/2016/texmf-dist/tex/latex/units/nicefrac.sty
INPUT /usr/local/texlive/2016/texmf-dist/tex/latex/base/ifthen.sty
INPUT /usr/local/texlive/2016/texmf-dist/tex/latex/base/ifthen.sty
INPUT /usr/local/texlive/2016/texmf-dist/tex/latex/caption/caption.sty
INPUT /usr/local/texlive/2016/texmf-dist/tex/latex/caption/caption.sty
INPUT /usr/local/texlive/2016/texmf-dist/tex/latex/caption/caption3.sty
INPUT /usr/local/texlive/2016/texmf-dist/tex/latex/caption/caption3.sty
INPUT /usr/local/texlive/2016/texmf-dist/tex/latex/graphics/keyval.sty
INPUT /usr/local/texlive/2016/texmf-dist/tex/latex/graphics/keyval.sty
INPUT /usr/local/texlive/2016/texmf-dist/tex/latex/booktabs/booktabs.sty
INPUT /usr/local/texlive/2016/texmf-dist/tex/latex/booktabs/booktabs.sty
INPUT /usr/local/texlive/2016/texmf-dist/tex/latex/chngcntr/chngcntr.sty
INPUT /usr/local/texlive/2016/texmf-dist/tex/latex/chngcntr/chngcntr.sty
INPUT /usr/local/texlive/2016/texmf-dist/tex/latex/float/float.sty
INPUT /usr/local/texlive/2016/texmf-dist/tex/latex/float/float.sty
INPUT /usr/local/texlive/2016/texmf-dist/tex/latex/setspace/setspace.sty
INPUT /usr/local/texlive/2016/texmf-dist/tex/latex/setspace/setspace.sty
INPUT /usr/local/texlive/2016/texmf-dist/tex/latex/geometry/geometry.sty
INPUT /usr/local/texlive/2016/texmf-dist/tex/latex/geometry/geometry.sty
INPUT /usr/local/texlive/2016/texmf-dist/tex/generic/oberdiek/ifvtex.sty
INPUT /usr/local/texlive/2016/texmf-dist/tex/generic/oberdiek/ifvtex.sty
INPUT /usr/local/texlive/2016/texmf-dist/tex/latex/hyperref/hyperref.sty
INPUT /usr/local/texlive/2016/texmf-dist/tex/latex/hyperref/hyperref.sty
INPUT /usr/local/texlive/2016/texmf-dist/tex/generic/oberdiek/hobsub-hyperref.sty
INPUT /usr/local/texlive/2016/texmf-dist/tex/generic/oberdiek/hobsub-hyperref.sty
INPUT /usr/local/texlive/2016/texmf-dist/tex/generic/oberdiek/hobsub-hyperref.sty
INPUT /usr/local/texlive/2016/texmf-dist/tex/generic/oberdiek/hobsub-generic.sty
INPUT /usr/local/texlive/2016/texmf-dist/tex/generic/oberdiek/hobsub-generic.sty
INPUT /usr/local/texlive/2016/texmf-dist/tex/latex/oberdiek/auxhook.sty
INPUT /usr/local/texlive/2016/texmf-dist/tex/latex/oberdiek/auxhook.sty
INPUT /usr/local/texlive/2016/texmf-dist/tex/latex/oberdiek/kvoptions.sty
INPUT /usr/local/texlive/2016/texmf-dist/tex/latex/oberdiek/kvoptions.sty
INPUT /usr/local/texlive/2016/texmf-dist/tex/latex/hyperref/pd1enc.def
INPUT /usr/local/texlive/2016/texmf-dist/tex/latex/hyperref/pd1enc.def
INPUT /usr/local/texlive/2016/texmf-dist/tex/latex/latexconfig/hyperref.cfg
INPUT /usr/local/texlive/2016/texmf-dist/tex/latex/latexconfig/hyperref.cfg
INPUT /usr/local/texlive/2016/texmf-dist/tex/latex/url/url.sty
INPUT /usr/local/texlive/2016/texmf-dist/tex/latex/url/url.sty
INPUT /usr/local/texlive/2016/texmf-dist/tex/latex/hyperref/hpdftex.def
INPUT /usr/local/texlive/2016/texmf-dist/tex/latex/hyperref/hpdftex.def
INPUT /usr/local/texlive/2016/texmf-dist/tex/latex/oberdiek/rerunfilecheck.sty
INPUT /usr/local/texlive/2016/texmf-dist/tex/latex/oberdiek/rerunfilecheck.sty
INPUT /usr/local/texlive/2016/texmf-dist/tex/latex/was/gensymb.sty
INPUT /usr/local/texlive/2016/texmf-dist/tex/latex/was/gensymb.sty
INPUT /usr/local/texlive/2016/texmf-dist/tex/latex/graphics/epsfig.sty
INPUT /usr/local/texlive/2016/texmf-dist/tex/latex/graphics/epsfig.sty
INPUT /usr/local/texlive/2016/texmf-dist/tex/latex/graphics/graphicx.sty
INPUT /usr/local/texlive/2016/texmf-dist/tex/latex/graphics/graphicx.sty
INPUT /usr/local/texlive/2016/texmf-dist/tex/latex/titling/titling.sty
INPUT /usr/local/texlive/2016/texmf-dist/tex/latex/titling/titling.sty
INPUT OnlineAppendixJCR_16_0025.aux
INPUT OnlineAppendixJCR_16_0025.aux
OUTPUT OnlineAppendixJCR_16_0025.aux
INPUT /usr/local/texlive/2016/texmf-dist/tex/context/base/mkii/supp-pdf.mkii
INPUT /usr/local/texlive/2016/texmf-dist/tex/context/base/mkii/supp-pdf.mkii
INPUT /usr/local/texlive/2016/texmf-dist/tex/latex/oberdiek/epstopdf-base.sty
INPUT /usr/local/texlive/2016/texmf-dist/tex/latex/oberdiek/epstopdf-base.sty
INPUT /usr/local/texlive/2016/texmf-dist/tex/latex/oberdiek/grfext.sty
INPUT /usr/local/texlive/2016/texmf-dist/tex/latex/oberdiek/grfext.sty
INPUT /usr/local/texlive/2016/texmf-dist/tex/latex/latexconfig/epstopdf-sys.cfg
INPUT /usr/local/texlive/2016/texmf-dist/tex/latex/latexconfig/epstopdf-sys.cfg
INPUT /usr/local/texlive/2016/texmf-dist/tex/latex/hyperref/nameref.sty
INPUT /usr/local/texlive/2016/texmf-dist/tex/latex/hyperref/nameref.sty
INPUT /usr/local/texlive/2016/texmf-dist/tex/generic/oberdiek/gettitlestring.sty
INPUT /usr/local/texlive/2016/texmf-dist/tex/generic/oberdiek/gettitlestring.sty
INPUT OnlineAppendixJCR_16_0025.out
INPUT OnlineAppendixJCR_16_0025.out
INPUT OnlineAppendixJCR_16_0025.out
INPUT OnlineAppendixJCR_16_0025.out
OUTPUT OnlineAppendixJCR_16_0025.pdf
INPUT ./OnlineAppendixJCR_16_0025.out
INPUT ./OnlineAppendixJCR_16_0025.out
OUTPUT OnlineAppendixJCR_16_0025.out
INPUT /usr/local/texlive/2016/texmf-dist/fonts/tfm/jknappen/ec/ecrm2488.tfm
INPUT /usr/local/texlive/2016/texmf-dist/fonts/tfm/jknappen/ec/ecbx2488.tfm
INPUT /usr/local/texlive/2016/texmf-dist/fonts/tfm/jknappen/ec/ecxc2488.tfm
INPUT /usr/local/texlive/2016/texmf-dist/fonts/tfm/jknappen/ec/ecrm1440.tfm
INPUT /usr/local/texlive/2016/texmf-dist/fonts/tfm/jknappen/ec/eccc1440.tfm
INPUT /usr/local/texlive/2016/texmf-dist/fonts/tfm/jknappen/ec/ecrm1728.tfm
INPUT /usr/local/texlive/2016/texmf-dist/fonts/tfm/jknappen/ec/ecbx1728.tfm
INPUT /usr/local/texlive/2016/texmf-dist/fonts/tfm/jknappen/ec/ecrm1000.tfm
INPUT /usr/local/texlive/2016/texmf-dist/fonts/tfm/public/amsfonts/cmextra/cmex7.tfm
INPUT /usr/local/texlive/2016/texmf-dist/fonts/tfm/public/amsfonts/cmextra/cmex7.tfm
INPUT /usr/local/texlive/2016/texmf-dist/tex/latex/amsfonts/umsa.fd
INPUT /usr/local/texlive/2016/texmf-dist/tex/latex/amsfonts/umsa.fd
INPUT /usr/local/texlive/2016/texmf-dist/fonts/tfm/public/amsfonts/symbols/msam10.tfm
INPUT /usr/local/texlive/2016/texmf-dist/fonts/tfm/public/amsfonts/symbols/msam7.tfm
INPUT /usr/local/texlive/2016/texmf-dist/fonts/tfm/public/amsfonts/symbols/msam5.tfm
INPUT /usr/local/texlive/2016/texmf-dist/tex/latex/amsfonts/umsb.fd
INPUT /usr/local/texlive/2016/texmf-dist/tex/latex/amsfonts/umsb.fd
INPUT /usr/local/texlive/2016/texmf-dist/fonts/tfm/public/amsfonts/symbols/msbm10.tfm
INPUT /usr/local/texlive/2016/texmf-dist/fonts/tfm/public/amsfonts/symbols/msbm7.tfm
INPUT /usr/local/texlive/2016/texmf-dist/fonts/tfm/public/amsfonts/symbols/msbm5.tfm
INPUT /usr/local/texlive/2016/texmf-dist/tex/latex/base/ulasy.fd
INPUT /usr/local/texlive/2016/texmf-dist/tex/latex/base/ulasy.fd
INPUT /usr/local/texlive/2016/texmf-dist/fonts/tfm/public/latex-fonts/lasy10.tfm
INPUT /usr/local/texlive/2016/texmf-dist/fonts/tfm/public/latex-fonts/lasy7.tfm
INPUT /usr/local/texlive/2016/texmf-dist/fonts/tfm/public/latex-fonts/lasy5.tfm
INPUT /usr/local/texlive/2016/texmf-dist/fonts/tfm/jknappen/ec/ecrm0800.tfm
INPUT /usr/local/texlive/2016/texmf-dist/fonts/tfm/public/cm/cmr8.tfm
INPUT /usr/local/texlive/2016/texmf-dist/fonts/tfm/public/cm/cmr6.tfm
INPUT /usr/local/texlive/2016/texmf-dist/fonts/tfm/public/cm/cmmi8.tfm
INPUT /usr/local/texlive/2016/texmf-dist/fonts/tfm/public/cm/cmmi6.tfm
INPUT /usr/local/texlive/2016/texmf-dist/fonts/tfm/public/cm/cmsy8.tfm
INPUT /usr/local/texlive/2016/texmf-dist/fonts/tfm/public/cm/cmsy6.tfm
INPUT /usr/local/texlive/2016/texmf-dist/fonts/tfm/public/amsfonts/cmextra/cmex8.tfm
INPUT /usr/local/texlive/2016/texmf-dist/fonts/tfm/public/amsfonts/cmextra/cmex7.tfm
INPUT /usr/local/texlive/2016/texmf-dist/fonts/tfm/public/amsfonts/symbols/msam10.tfm
INPUT /usr/local/texlive/2016/texmf-dist/fonts/tfm/public/amsfonts/symbols/msam7.tfm
INPUT /usr/local/texlive/2016/texmf-dist/fonts/tfm/public/amsfonts/symbols/msbm10.tfm
INPUT /usr/local/texlive/2016/texmf-dist/fonts/tfm/public/amsfonts/symbols/msbm7.tfm
INPUT /usr/local/texlive/2016/texmf-dist/fonts/tfm/public/latex-fonts/lasy8.tfm
INPUT /usr/local/texlive/2016/texmf-dist/fonts/tfm/public/latex-fonts/lasy6.tfm
INPUT /usr/local/texlive/2016/texmf-var/fonts/map/pdftex/updmap/pdftex.map
INPUT /usr/local/texlive/2016/texmf-dist/fonts/tfm/jknappen/ec/ecbx1440.tfm
INPUT /usr/local/texlive/2016/texmf-dist/fonts/tfm/jknappen/ec/ecrm1095.tfm
INPUT /usr/local/texlive/2016/texmf-dist/fonts/tfm/public/cm/cmr10.tfm
INPUT /usr/local/texlive/2016/texmf-dist/fonts/tfm/public/cm/cmmi10.tfm
INPUT /usr/local/texlive/2016/texmf-dist/fonts/tfm/public/cm/cmsy10.tfm
INPUT /usr/local/texlive/2016/texmf-dist/fonts/tfm/public/cm/cmex10.tfm
INPUT /usr/local/texlive/2016/texmf-dist/fonts/tfm/public/amsfonts/symbols/msam10.tfm
INPUT /usr/local/texlive/2016/texmf-dist/fonts/tfm/public/amsfonts/symbols/msbm10.tfm
INPUT /usr/local/texlive/2016/texmf-dist/fonts/tfm/public/latex-fonts/lasy10.tfm
INPUT CoeffShockCI.pdf
INPUT ./CoeffShockCI.pdf
INPUT ./CoeffShockCI.pdf
INPUT CoeffPlotAgeGroup.pdf
INPUT ./CoeffPlotAgeGroup.pdf
INPUT ./CoeffPlotAgeGroup.pdf
INPUT /usr/local/texlive/2016/texmf-dist/fonts/tfm/jknappen/ec/ecbx0800.tfm
INPUT OnlineAppendixJCR_16_0025.bbl
INPUT OnlineAppendixJCR_16_0025.bbl
INPUT /usr/local/texlive/2016/texmf-dist/fonts/tfm/jknappen/ec/ecti1200.tfm
INPUT /usr/local/texlive/2016/texmf-dist/fonts/tfm/public/cm/cmmi12.tfm
INPUT /usr/local/texlive/2016/texmf-dist/fonts/tfm/public/cm/cmsy10.tfm
INPUT /usr/local/texlive/2016/texmf-dist/fonts/tfm/public/cm/cmex10.tfm
INPUT /usr/local/texlive/2016/texmf-dist/fonts/tfm/public/amsfonts/symbols/msam10.tfm
INPUT /usr/local/texlive/2016/texmf-dist/fonts/tfm/public/amsfonts/symbols/msbm10.tfm
INPUT /usr/local/texlive/2016/texmf-dist/fonts/tfm/public/latex-fonts/lasy10.tfm
INPUT OnlineAppendixJCR_16_0025.aux
INPUT ./OnlineAppendixJCR_16_0025.out
INPUT ./OnlineAppendixJCR_16_0025.out
INPUT /usr/local/texlive/2016/texmf-dist/fonts/enc/dvips/cm-super/cm-super-t1.enc
INPUT /usr/local/texlive/2016/texmf-dist/fonts/type1/public/amsfonts/cm/cmmi10.pfb
INPUT /usr/local/texlive/2016/texmf-dist/fonts/type1/public/amsfonts/cm/cmmi6.pfb
INPUT /usr/local/texlive/2016/texmf-dist/fonts/type1/public/amsfonts/cm/cmmi7.pfb
INPUT /usr/local/texlive/2016/texmf-dist/fonts/type1/public/amsfonts/cm/cmmi8.pfb
INPUT /usr/local/texlive/2016/texmf-dist/fonts/type1/public/amsfonts/cm/cmr10.pfb
INPUT /usr/local/texlive/2016/texmf-dist/fonts/type1/public/amsfonts/cm/cmr6.pfb
INPUT /usr/local/texlive/2016/texmf-dist/fonts/type1/public/amsfonts/cm/cmr7.pfb
INPUT /usr/local/texlive/2016/texmf-dist/fonts/type1/public/amsfonts/cm/cmr8.pfb
INPUT /usr/local/texlive/2016/texmf-dist/fonts/type1/public/amsfonts/cm/cmsy10.pfb
INPUT /usr/local/texlive/2016/texmf-dist/fonts/type1/public/amsfonts/cm/cmsy6.pfb
INPUT /usr/local/texlive/2016/texmf-dist/fonts/type1/public/amsfonts/cm/cmsy7.pfb
INPUT /usr/local/texlive/2016/texmf-dist/fonts/type1/public/amsfonts/cm/cmsy8.pfb
INPUT /usr/local/texlive/2016/texmf-dist/fonts/type1/public/cm-super/sfbx0800.pfb
INPUT /usr/local/texlive/2016/texmf-dist/fonts/type1/public/cm-super/sfbx1440.pfb
INPUT /usr/local/texlive/2016/texmf-dist/fonts/type1/public/cm-super/sfbx1728.pfb
INPUT /usr/local/texlive/2016/texmf-dist/fonts/type1/public/cm-super/sfcc1440.pfb
INPUT /usr/local/texlive/2016/texmf-dist/fonts/type1/public/cm-super/sfrm0800.pfb
INPUT /usr/local/texlive/2016/texmf-dist/fonts/type1/public/cm-super/sfrm1000.pfb
INPUT /usr/local/texlive/2016/texmf-dist/fonts/type1/public/cm-super/sfrm1095.pfb
INPUT /usr/local/texlive/2016/texmf-dist/fonts/type1/public/cm-super/sfrm1200.pfb
INPUT /usr/local/texlive/2016/texmf-dist/fonts/type1/public/cm-super/sfti1200.pfb
INPUT /usr/local/texlive/2016/texmf-dist/fonts/type1/public/cm-super/sfxc2488.pfb
