# Supplementary material
Source: publisher figshare collection journal article supplement (https://sage.figshare.com/ndownloader/files/12974006)
Supplement: Supplementary file 1 [file 12974006 › OnlineAppendixJCR_16_0025.log]

This is pdfTeX, Version 3.14159265-2.6-1.40.17 (TeX Live 2016) (preloaded format=pdflatex 2016.7.22)  8 APR 2017 10:35
entering extended mode
 restricted \write18 enabled.
 %&-line parsing enabled.
**OnlineAppendixJCR_16_0025.tex
(./OnlineAppendixJCR_16_0025.tex
LaTeX2e <2016/03/31>
Babel <3.9r> and hyphenation patterns for 83 language(s) loaded.
(/usr/local/texlive/2016/texmf-dist/tex/latex/base/article.cls
Document Class: article 2014/09/29 v1.4h Standard LaTeX document class
(/usr/local/texlive/2016/texmf-dist/tex/latex/base/size12.clo
File: size12.clo 2014/09/29 v1.4h Standard LaTeX file (size option)
)
\c@part=\count79
\c@section=\count80
\c@subsection=\count81
\c@subsubsection=\count82
\c@paragraph=\count83
\c@subparagraph=\count84
\c@figure=\count85
\c@table=\count86
\abovecaptionskip=\skip41
\belowcaptionskip=\skip42
\bibindent=\dimen102
)
(/usr/local/texlive/2016/texmf-dist/tex/latex/multirow/multirow.sty
\bigstrutjot=\dimen103
)
(/usr/local/texlive/2016/texmf-dist/tex/latex/base/fontenc.sty
Package: fontenc 2005/09/27 v1.99g Standard LaTeX package

(/usr/local/texlive/2016/texmf-dist/tex/latex/base/t1enc.def
File: t1enc.def 2005/09/27 v1.99g Standard LaTeX file
LaTeX Font Info:    Redeclaring font encoding T1 on input line 48.
))
(/usr/local/texlive/2016/texmf-dist/tex/latex/amsfonts/amsfonts.sty
Package: amsfonts 2013/01/14 v3.01 Basic AMSFonts support
\@emptytoks=\toks14
\symAMSa=\mathgroup4
\symAMSb=\mathgroup5
LaTeX Font Info:    Overwriting math alphabet `\mathfrak' in version `bold'
(Font)                  U/euf/m/n --> U/euf/b/n on input line 106.
)
(/usr/local/texlive/2016/texmf-dist/tex/latex/amscls/amsthm.sty
Package: amsthm 2015/03/04 v2.20.2
\thm@style=\toks15
\thm@bodyfont=\toks16
\thm@headfont=\toks17
\thm@notefont=\toks18
\thm@headpunct=\toks19
\thm@preskip=\skip43
\thm@postskip=\skip44
\thm@headsep=\skip45
\dth@everypar=\toks20
)
(/usr/local/texlive/2016/texmf-dist/tex/latex/amsmath/amsmath.sty
Package: amsmath 2016/03/10 v2.15b AMS math features
\@mathmargin=\skip46

For additional information on amsmath, use the `?' option.
(/usr/local/texlive/2016/texmf-dist/tex/latex/amsmath/amstext.sty
Package: amstext 2000/06/29 v2.01 AMS text

(/usr/local/texlive/2016/texmf-dist/tex/latex/amsmath/amsgen.sty
File: amsgen.sty 1999/11/30 v2.0 generic functions
\@emptytoks=\toks21
\ex@=\dimen104
))
(/usr/local/texlive/2016/texmf-dist/tex/latex/amsmath/amsbsy.sty
Package: amsbsy 1999/11/29 v1.2d Bold Symbols
\pmbraise@=\dimen105
)
(/usr/local/texlive/2016/texmf-dist/tex/latex/amsmath/amsopn.sty
Package: amsopn 2016/03/08 v2.02 operator names
)
\inf@bad=\count87
LaTeX Info: Redefining \frac on input line 199.
\uproot@=\count88
\leftroot@=\count89
LaTeX Info: Redefining \overline on input line 297.
\classnum@=\count90
\DOTSCASE@=\count91
LaTeX Info: Redefining \ldots on input line 394.
LaTeX Info: Redefining \dots on input line 397.
LaTeX Info: Redefining \cdots on input line 518.
\Mathstrutbox@=\box26
\strutbox@=\box27
\big@size=\dimen106
LaTeX Font Info:    Redeclaring font encoding OML on input line 634.
LaTeX Font Info:    Redeclaring font encoding OMS on input line 635.
\macc@depth=\count92
\c@MaxMatrixCols=\count93
\dotsspace@=\muskip10
\c@parentequation=\count94
\dspbrk@lvl=\count95
\tag@help=\toks22
\row@=\count96
\column@=\count97
\maxfields@=\count98
\andhelp@=\toks23
\eqnshift@=\dimen107
\alignsep@=\dimen108
\tagshift@=\dimen109
\tagwidth@=\dimen110
\totwidth@=\dimen111
\lineht@=\dimen112
\@envbody=\toks24
\multlinegap=\skip47
\multlinetaggap=\skip48
\mathdisplay@stack=\toks25
LaTeX Info: Redefining \[ on input line 2739.
LaTeX Info: Redefining \] on input line 2740.
)
(/usr/local/texlive/2016/texmf-dist/tex/latex/relsize/relsize.sty
Package: relsize 2013/03/29 ver 4.1
)
(/usr/local/texlive/2016/texmf-dist/tex/latex/base/latexsym.sty
Package: latexsym 1998/08/17 v2.2e Standard LaTeX package (lasy symbols)
\symlasy=\mathgroup6
LaTeX Font Info:    Overwriting symbol font `lasy' in version `bold'
(Font)                  U/lasy/m/n --> U/lasy/b/n on input line 52.
)
(/usr/local/texlive/2016/texmf-dist/tex/latex/tools/enumerate.sty
Package: enumerate 2015/07/23 v3.00 enumerate extensions (DPC)
\@enLab=\toks26
)
(/usr/local/texlive/2016/texmf-dist/tex/latex/natbib/natbib.sty
Package: natbib 2010/09/13 8.31b (PWD, AO)
\bibhang=\skip49
\bibsep=\skip50
LaTeX Info: Redefining \cite on input line 694.
\c@NAT@ctr=\count99
)
(/usr/local/texlive/2016/texmf-dist/tex/latex/endnotes/endnotes.sty
\c@endnote=\count100
\endnotesep=\dimen113
\@enotes=\write3
)
(/usr/local/texlive/2016/texmf-dist/tex/latex/oberdiek/pdflscape.sty
Package: pdflscape 2016/05/14 v0.11 Display of landscape pages in PDF (HO)

(/usr/local/texlive/2016/texmf-dist/tex/latex/graphics/lscape.sty
Package: lscape 2000/10/22 v3.01 Landscape Pages (DPC)

(/usr/local/texlive/2016/texmf-dist/tex/latex/graphics/graphics.sty
Package: graphics 2016/05/09 v1.0r Standard LaTeX Graphics (DPC,SPQR)

(/usr/local/texlive/2016/texmf-dist/tex/latex/graphics/trig.sty
Package: trig 2016/01/03 v1.10 sin cos tan (DPC)
)
(/usr/local/texlive/2016/texmf-dist/tex/latex/graphics-cfg/graphics.cfg
File: graphics.cfg 2016/01/02 v1.10 sample graphics configuration
)
Package graphics Info: Driver file: pdftex.def on input line 96.

(/usr/local/texlive/2016/texmf-dist/tex/latex/pdftex-def/pdftex.def
File: pdftex.def 2011/05/27 v0.06d Graphics/color for pdfTeX

(/usr/local/texlive/2016/texmf-dist/tex/generic/oberdiek/infwarerr.sty
Package: infwarerr 2016/05/16 v1.4 Providing info/warning/error messages (HO)
)
(/usr/local/texlive/2016/texmf-dist/tex/generic/oberdiek/ltxcmds.sty
Package: ltxcmds 2016/05/16 v1.23 LaTeX kernel commands for general use (HO)
)
\Gread@gobject=\count101
)))
(/usr/local/texlive/2016/texmf-dist/tex/generic/oberdiek/ifpdf.sty
Package: ifpdf 2016/05/14 v3.1 Provides the ifpdf switch
)
Package pdflscape Info: Auto-detected driver: pdftex on input line 81.

(/usr/local/texlive/2016/texmf-dist/tex/generic/ifxetex/ifxetex.sty
Package: ifxetex 2010/09/12 v0.6 Provides ifxetex conditional
))
(/usr/local/texlive/2016/texmf-dist/tex/latex/appendix/appendix.sty
Package: appendix 2009/09/02 v1.2b extra appendix facilities
\c@@pps=\count102
\c@@ppsavesec=\count103
\c@@ppsaveapp=\count104
)
(/usr/local/texlive/2016/texmf-dist/tex/latex/units/nicefrac.sty
Package: nicefrac 1998/08/04 v0.9b Nice fractions
\L@UnitsRaiseDisplaystyle=\skip51
\L@UnitsRaiseTextstyle=\skip52
\L@UnitsRaiseScriptstyle=\skip53

(/usr/local/texlive/2016/texmf-dist/tex/latex/base/ifthen.sty
Package: ifthen 2014/09/29 v1.1c Standard LaTeX ifthen package (DPC)
))
(/usr/local/texlive/2016/texmf-dist/tex/latex/caption/caption.sty
Package: caption 2016/02/21 v3.3-144 Customizing captions (AR)

(/usr/local/texlive/2016/texmf-dist/tex/latex/caption/caption3.sty
Package: caption3 2016/02/04 v1.7-139 caption3 kernel (AR)
Package caption3 Info: TeX engine: e-TeX on input line 67.

(/usr/local/texlive/2016/texmf-dist/tex/latex/graphics/keyval.sty
Package: keyval 2014/10/28 v1.15 key=value parser (DPC)
\KV@toks@=\toks27
)
\captionmargin=\dimen114
\captionmargin@=\dimen115
\captionwidth=\dimen116
\caption@tempdima=\dimen117
\caption@indent=\dimen118
\caption@parindent=\dimen119
\caption@hangindent=\dimen120
)
\c@ContinuedFloat=\count105
)
(/usr/local/texlive/2016/texmf-dist/tex/latex/booktabs/booktabs.sty
Package: booktabs 2016/04/27 v1.618033 publication quality tables
\heavyrulewidth=\dimen121
\lightrulewidth=\dimen122
\cmidrulewidth=\dimen123
\belowrulesep=\dimen124
\belowbottomsep=\dimen125
\aboverulesep=\dimen126
\abovetopsep=\dimen127
\cmidrulesep=\dimen128
\cmidrulekern=\dimen129
\defaultaddspace=\dimen130
\@cmidla=\count106
\@cmidlb=\count107
\@aboverulesep=\dimen131
\@belowrulesep=\dimen132
\@thisruleclass=\count108
\@lastruleclass=\count109
\@thisrulewidth=\dimen133
)
(/usr/local/texlive/2016/texmf-dist/tex/latex/chngcntr/chngcntr.sty
Package: chngcntr 2009/09/02 v1.0a change counter resetting
)
(/usr/local/texlive/2016/texmf-dist/tex/latex/float/float.sty
Package: float 2001/11/08 v1.3d Float enhancements (AL)
\c@float@type=\count110
\float@exts=\toks28
\float@box=\box28
\@float@everytoks=\toks29
\@floatcapt=\box29
)
(/usr/local/texlive/2016/texmf-dist/tex/latex/setspace/setspace.sty
Package: setspace 2011/12/19 v6.7a set line spacing
)
(/usr/local/texlive/2016/texmf-dist/tex/latex/geometry/geometry.sty
Package: geometry 2010/09/12 v5.6 Page Geometry

(/usr/local/texlive/2016/texmf-dist/tex/generic/oberdiek/ifvtex.sty
Package: ifvtex 2016/05/16 v1.6 Detect VTeX and its facilities (HO)
Package ifvtex Info: VTeX not detected.
)
\Gm@cnth=\count111
\Gm@cntv=\count112
\c@Gm@tempcnt=\count113
\Gm@bindingoffset=\dimen134
\Gm@wd@mp=\dimen135
\Gm@odd@mp=\dimen136
\Gm@even@mp=\dimen137
\Gm@layoutwidth=\dimen138
\Gm@layoutheight=\dimen139
\Gm@layouthoffset=\dimen140
\Gm@layoutvoffset=\dimen141
\Gm@dimlist=\toks30
)
(/usr/local/texlive/2016/texmf-dist/tex/latex/hyperref/hyperref.sty
Package: hyperref 2016/05/05 v6.83n Hypertext links for LaTeX

(/usr/local/texlive/2016/texmf-dist/tex/generic/oberdiek/hobsub-hyperref.sty
Package: hobsub-hyperref 2016/05/16 v1.14 Bundle oberdiek, subset hyperref (HO)


(/usr/local/texlive/2016/texmf-dist/tex/generic/oberdiek/hobsub-generic.sty
Package: hobsub-generic 2016/05/16 v1.14 Bundle oberdiek, subset generic (HO)
Package: hobsub 2016/05/16 v1.14 Construct package bundles (HO)
Package hobsub Info: Skipping package `infwarerr' (already loaded).
Package hobsub Info: Skipping package `ltxcmds' (already loaded).
Package: ifluatex 2016/05/16 v1.4 Provides the ifluatex switch (HO)
Package ifluatex Info: LuaTeX not detected.
Package hobsub Info: Skipping package `ifvtex' (already loaded).
Package: intcalc 2016/05/16 v1.2 Expandable calculations with integers (HO)
Package hobsub Info: Skipping package `ifpdf' (already loaded).
Package: etexcmds 2016/05/16 v1.6 Avoid name clashes with e-TeX commands (HO)
Package etexcmds Info: Could not find \expanded.
(etexcmds)             That can mean that you are not using pdfTeX 1.50 or
(etexcmds)             that some package has redefined \expanded.
(etexcmds)             In the latter case, load this package earlier.
Package: kvsetkeys 2016/05/16 v1.17 Key value parser (HO)
Package: kvdefinekeys 2016/05/16 v1.4 Define keys (HO)
Package: pdftexcmds 2016/05/10 v0.21 Utility functions of pdfTeX for LuaTeX (HO
)
Package pdftexcmds Info: LuaTeX not detected.
Package pdftexcmds Info: \pdf@primitive is available.
Package pdftexcmds Info: \pdf@ifprimitive is available.
Package pdftexcmds Info: \pdfdraftmode found.
Package: pdfescape 2016/05/16 v1.14 Implements pdfTeX's escape features (HO)
Package: bigintcalc 2016/05/16 v1.4 Expandable calculations on big integers (HO
)
Package: bitset 2016/05/16 v1.2 Handle bit-vector datatype (HO)
Package: uniquecounter 2016/05/16 v1.3 Provide unlimited unique counter (HO)
)
Package hobsub Info: Skipping package `hobsub' (already loaded).
Package: letltxmacro 2016/05/16 v1.5 Let assignment for LaTeX macros (HO)
Package: hopatch 2016/05/16 v1.3 Wrapper for package hooks (HO)
Package: xcolor-patch 2016/05/16 xcolor patch
Package: atveryend 2016/05/16 v1.9 Hooks at the very end of document (HO)
Package atveryend Info: \enddocument detected (standard20110627).
Package: atbegshi 2016/05/16 v1.17 At begin shipout hook (HO)
Package: refcount 2016/05/16 v3.5 Data extraction from label references (HO)
Package: hycolor 2016/05/16 v1.8 Color options for hyperref/bookmark (HO)
)
(/usr/local/texlive/2016/texmf-dist/tex/latex/oberdiek/auxhook.sty
Package: auxhook 2016/05/16 v1.4 Hooks for auxiliary files (HO)
)
(/usr/local/texlive/2016/texmf-dist/tex/latex/oberdiek/kvoptions.sty
Package: kvoptions 2016/05/16 v3.12 Key value format for package options (HO)
)
\@linkdim=\dimen142
\Hy@linkcounter=\count114
\Hy@pagecounter=\count115

(/usr/local/texlive/2016/texmf-dist/tex/latex/hyperref/pd1enc.def
File: pd1enc.def 2016/05/05 v6.83n Hyperref: PDFDocEncoding definition (HO)
)
\Hy@SavedSpaceFactor=\count116

(/usr/local/texlive/2016/texmf-dist/tex/latex/latexconfig/hyperref.cfg
File: hyperref.cfg 2002/06/06 v1.2 hyperref configuration of TeXLive
)
Package hyperref Info: Option `hyperfootnotes' set `false' on input line 4322.
Package hyperref Info: Hyper figures OFF on input line 4446.
Package hyperref Info: Link nesting OFF on input line 4451.
Package hyperref Info: Hyper index ON on input line 4454.
Package hyperref Info: Plain pages OFF on input line 4461.
Package hyperref Info: Backreferencing OFF on input line 4466.
Package hyperref Info: Implicit mode ON; LaTeX internals redefined.
Package hyperref Info: Bookmarks ON on input line 4691.
\c@Hy@tempcnt=\count117

(/usr/local/texlive/2016/texmf-dist/tex/latex/url/url.sty
\Urlmuskip=\muskip11
Package: url 2013/09/16  ver 3.4  Verb mode for urls, etc.
)
LaTeX Info: Redefining \url on input line 5044.
\XeTeXLinkMargin=\dimen143
\Fld@menulength=\count118
\Field@Width=\dimen144
\Fld@charsize=\dimen145
Package hyperref Info: Hyper figures OFF on input line 6298.
Package hyperref Info: Link nesting OFF on input line 6303.
Package hyperref Info: Hyper index ON on input line 6306.
Package hyperref Info: backreferencing OFF on input line 6313.
Package hyperref Info: Link coloring OFF on input line 6318.
Package hyperref Info: Link coloring with OCG OFF on input line 6323.
Package hyperref Info: PDF/A mode OFF on input line 6328.
LaTeX Info: Redefining \ref on input line 6368.
LaTeX Info: Redefining \pageref on input line 6372.
\Hy@abspage=\count119
\c@Item=\count120
)

Package hyperref Message: Driver (autodetected): hpdftex.

(/usr/local/texlive/2016/texmf-dist/tex/latex/hyperref/hpdftex.def
File: hpdftex.def 2016/05/05 v6.83n Hyperref driver for pdfTeX
\Fld@listcount=\count121
\c@bookmark@seq@number=\count122

(/usr/local/texlive/2016/texmf-dist/tex/latex/oberdiek/rerunfilecheck.sty
Package: rerunfilecheck 2016/05/16 v1.8 Rerun checks for auxiliary files (HO)
Package uniquecounter Info: New unique counter `rerunfilecheck' on input line 2
82.
)
\Hy@SectionHShift=\skip54
)
(/usr/local/texlive/2016/texmf-dist/tex/latex/was/gensymb.sty
Package: gensymb 2003/07/02 v1.0 (WaS)
)
(/usr/local/texlive/2016/texmf-dist/tex/latex/graphics/epsfig.sty
Package: epsfig 1999/02/16 v1.7a (e)psfig emulation (SPQR)

(/usr/local/texlive/2016/texmf-dist/tex/latex/graphics/graphicx.sty
Package: graphicx 2014/10/28 v1.0g Enhanced LaTeX Graphics (DPC,SPQR)
\Gin@req@height=\dimen146
\Gin@req@width=\dimen147
)
\epsfxsize=\dimen148
\epsfysize=\dimen149
)
\c@prop=\count123
\c@cor=\count124
\c@lem=\count125

(/usr/local/texlive/2016/texmf-dist/tex/latex/titling/titling.sty
Package: titling 2009/09/04 v2.1d maketitle typesetting
\thanksmarkwidth=\skip55
\thanksmargin=\skip56
\droptitle=\skip57
)
(./OnlineAppendixJCR_16_0025.aux)
\openout1 = `OnlineAppendixJCR_16_0025.aux'.

LaTeX Font Info:    Checking defaults for OML/cmm/m/it on input line 65.
LaTeX Font Info:    ... okay on input line 65.
LaTeX Font Info:    Checking defaults for T1/cmr/m/n on input line 65.
LaTeX Font Info:    ... okay on input line 65.
LaTeX Font Info:    Checking defaults for OT1/cmr/m/n on input line 65.
LaTeX Font Info:    ... okay on input line 65.
LaTeX Font Info:    Checking defaults for OMS/cmsy/m/n on input line 65.
LaTeX Font Info:    ... okay on input line 65.
LaTeX Font Info:    Checking defaults for OMX/cmex/m/n on input line 65.
LaTeX Font Info:    ... okay on input line 65.
LaTeX Font Info:    Checking defaults for U/cmr/m/n on input line 65.
LaTeX Font Info:    ... okay on input line 65.
LaTeX Font Info:    Checking defaults for PD1/pdf/m/n on input line 65.
LaTeX Font Info:    ... okay on input line 65.

(/usr/local/texlive/2016/texmf-dist/tex/context/base/mkii/supp-pdf.mkii
[Loading MPS to PDF converter (version 2006.09.02).]
\scratchcounter=\count126
\scratchdimen=\dimen150
\scratchbox=\box30
\nofMPsegments=\count127
\nofMParguments=\count128
\everyMPshowfont=\toks31
\MPscratchCnt=\count129
\MPscratchDim=\dimen151
\MPnumerator=\count130
\makeMPintoPDFobject=\count131
\everyMPtoPDFconversion=\toks32
) (/usr/local/texlive/2016/texmf-dist/tex/latex/oberdiek/epstopdf-base.sty
Package: epstopdf-base 2016/05/15 v2.6 Base part for package epstopdf

(/usr/local/texlive/2016/texmf-dist/tex/latex/oberdiek/grfext.sty
Package: grfext 2016/05/16 v1.2 Manage graphics extensions (HO)
)
Package grfext Info: Graphics extension search list:
(grfext)             [.png,.pdf,.jpg,.mps,.jpeg,.jbig2,.jb2,.PNG,.PDF,.JPG,.JPE
G,.JBIG2,.JB2,.eps]
(grfext)             \AppendGraphicsExtensions on input line 456.

(/usr/local/texlive/2016/texmf-dist/tex/latex/latexconfig/epstopdf-sys.cfg
File: epstopdf-sys.cfg 2010/07/13 v1.3 Configuration of (r)epstopdf for TeX Liv
e
))
Package caption Info: Begin \AtBeginDocument code.
Package caption Info: float package is loaded.
Package caption Info: hyperref package is loaded.
Package caption Info: End \AtBeginDocument code.

*geometry* driver: auto-detecting
*geometry* detected driver: pdftex
*geometry* verbose mode - [ preamble ] result:
* driver: pdftex
* paper: <default>
* layout: <same size as paper>
* layoutoffset:(h,v)=(0.0pt,0.0pt)
* modes: 
* h-part:(L,W,R)=(72.26999pt, 469.75502pt, 72.26999pt)
* v-part:(T,H,B)=(72.26999pt, 650.43001pt, 72.26999pt)
* \paperwidth=614.295pt
* \paperheight=794.96999pt
* \textwidth=469.75502pt
* \textheight=650.43001pt
* \oddsidemargin=0.0pt
* \evensidemargin=0.0pt
* \topmargin=0.0pt
* \headheight=0.0pt
* \headsep=0.0pt
* \topskip=12.0pt
* \footskip=30.0pt
* \marginparwidth=44.0pt
* \marginparsep=10.0pt
* \columnsep=10.0pt
* \skip\footins=10.8pt plus 4.0pt minus 2.0pt
* \hoffset=0.0pt
* \voffset=0.0pt
* \mag=1000
* \@twocolumnfalse
* \@twosidefalse
* \@mparswitchfalse
* \@reversemarginfalse
* (1in=72.27pt=25.4mm, 1cm=28.453pt)

\AtBeginShipoutBox=\box31
Package hyperref Info: Link coloring OFF on input line 65.
(/usr/local/texlive/2016/texmf-dist/tex/latex/hyperref/nameref.sty
Package: nameref 2012/10/27 v2.43 Cross-referencing by name of section

(/usr/local/texlive/2016/texmf-dist/tex/generic/oberdiek/gettitlestring.sty
Package: gettitlestring 2016/05/16 v1.5 Cleanup title references (HO)
)
\c@section@level=\count132
)
LaTeX Info: Redefining \ref on input line 65.
LaTeX Info: Redefining \pageref on input line 65.
LaTeX Info: Redefining \nameref on input line 65.

(./OnlineAppendixJCR_16_0025.out) (./OnlineAppendixJCR_16_0025.out)
\@outlinefile=\write4
\openout4 = `OnlineAppendixJCR_16_0025.out'.

LaTeX Info: Redefining \celsius on input line 65.
Package gensymb Info: Faking symbols for \degree and \celsius on input line 65.


Package gensymb Warning: Not defining \perthousand.

LaTeX Info: Redefining \ohm on input line 65.
Package gensymb Info: Using \Omega for \ohm on input line 65.

Package gensymb Warning: Not defining \micro.

LaTeX Font Info:    Try loading font information for U+msa on input line 85.
(/usr/local/texlive/2016/texmf-dist/tex/latex/amsfonts/umsa.fd
File: umsa.fd 2013/01/14 v3.01 AMS symbols A
)
LaTeX Font Info:    Try loading font information for U+msb on input line 85.

(/usr/local/texlive/2016/texmf-dist/tex/latex/amsfonts/umsb.fd
File: umsb.fd 2013/01/14 v3.01 AMS symbols B
)
LaTeX Font Info:    Try loading font information for U+lasy on input line 85.

(/usr/local/texlive/2016/texmf-dist/tex/latex/base/ulasy.fd
File: ulasy.fd 1998/08/17 v2.2e LaTeX symbol font definitions
) [1

{/usr/local/texlive/2016/texmf-var/fonts/map/pdftex/updmap/pdftex.map}] [2

] [3] [4] [5

]
[6] [7

] [8] [9

]
Overfull \hbox (12.0pt too wide) in paragraph at lines 473--502
 [] 
 []

[10

]
Overfull \hbox (7.30502pt too wide) in paragraph at lines 513--539
 [] 
 []

<CoeffShockCI.pdf, id=158, 722.7pt x 433.62pt>
File: CoeffShockCI.pdf Graphic file (type pdf)
 <use CoeffShockCI.pdf>
Package pdftex.def Info: CoeffShockCI.pdf used on input line 544.
(pdftex.def)             Requested size: 469.75502pt x 281.85628pt.

<CoeffPlotAgeGroup.pdf, id=159, 722.7pt x 433.62pt>
File: CoeffPlotAgeGroup.pdf Graphic file (type pdf)

<use CoeffPlotAgeGroup.pdf>
Package pdftex.def Info: CoeffPlotAgeGroup.pdf used on input line 550.
(pdftex.def)             Requested size: 469.75502pt x 281.85628pt.


LaTeX Warning: `!h' float specifier changed to `!ht'.

[11

 <./CoeffShockCI.pdf>] [12 <./CoeffPlotAgeGroup.pdf>]

LaTeX Warning: Reference `eq:SPEI2' on page S13 undefined on input line 591.


Overfull \hbox (7.30502pt too wide) in paragraph at lines 572--593
 [] 
 []

(./OnlineAppendixJCR_16_0025.bbl [13])
Package atveryend Info: Empty hook `BeforeClearDocument' on input line 597.
 [14]
Package atveryend Info: Empty hook `AfterLastShipout' on input line 597.
 (./OnlineAppendixJCR_16_0025.aux)
Package atveryend Info: Executing hook `AtVeryEndDocument' on input line 597.
Package atveryend Info: Executing hook `AtEndAfterFileList' on input line 597.
Package rerunfilecheck Info: File `OnlineAppendixJCR_16_0025.out' has not chang
ed.
(rerunfilecheck)             Checksum: EC0FE3DF44A50DA95FD9A67EE6807BE2;733.


LaTeX Warning: There were undefined references.

Package atveryend Info: Empty hook `AtVeryVeryEnd' on input line 597.
 )
(\end occurred inside a group at level 1)

### semi simple group (level 1) entered at line 51 (\begingroup)
### bottom level 
Here is how much of TeX's memory you used:
 8526 strings out of 493014
 126432 string characters out of 6133351
 273740 words of memory out of 5000000
 11859 multiletter control sequences out of 15000+600000
 22793 words of font info for 67 fonts, out of 8000000 for 9000
 1141 hyphenation exceptions out of 8191
 36i,12n,43p,1212b,1378s stack positions out of 5000i,500n,10000p,200000b,80000s
{/usr/local/texlive/2016/texmf-dist/fonts/enc/dvips/cm-super/cm
-super-t1.enc}</usr/local/texlive/2016/texmf-dist/fonts/type1/public/amsfonts/c
m/cmmi10.pfb></usr/local/texlive/2016/texmf-dist/fonts/type1/public/amsfonts/cm
/cmmi6.pfb></usr/local/texlive/2016/texmf-dist/fonts/type1/public/amsfonts/cm/c
mmi7.pfb></usr/local/texlive/2016/texmf-dist/fonts/type1/public/amsfonts/cm/cmm
i8.pfb></usr/local/texlive/2016/texmf-dist/fonts/type1/public/amsfonts/cm/cmr10
.pfb></usr/local/texlive/2016/texmf-dist/fonts/type1/public/amsfonts/cm/cmr6.pf
b></usr/local/texlive/2016/texmf-dist/fonts/type1/public/amsfonts/cm/cmr7.pfb><
/usr/local/texlive/2016/texmf-dist/fonts/type1/public/amsfonts/cm/cmr8.pfb></us
r/local/texlive/2016/texmf-dist/fonts/type1/public/amsfonts/cm/cmsy10.pfb></usr
/local/texlive/2016/texmf-dist/fonts/type1/public/amsfonts/cm/cmsy6.pfb></usr/l
ocal/texlive/2016/texmf-dist/fonts/type1/public/amsfonts/cm/cmsy7.pfb></usr/loc
al/texlive/2016/texmf-dist/fonts/type1/public/amsfonts/cm/cmsy8.pfb></usr/local
/texlive/2016/texmf-dist/fonts/type1/public/cm-super/sfbx0800.pfb></usr/local/t
exlive/2016/texmf-dist/fonts/type1/public/cm-super/sfbx1440.pfb></usr/local/tex
live/2016/texmf-dist/fonts/type1/public/cm-super/sfbx1728.pfb></usr/local/texli
ve/2016/texmf-dist/fonts/type1/public/cm-super/sfcc1440.pfb></usr/local/texlive
/2016/texmf-dist/fonts/type1/public/cm-super/sfrm0800.pfb></usr/local/texlive/2
016/texmf-dist/fonts/type1/public/cm-super/sfrm1000.pfb></usr/local/texlive/201
6/texmf-dist/fonts/type1/public/cm-super/sfrm1095.pfb></usr/local/texlive/2016/
texmf-dist/fonts/type1/public/cm-super/sfrm1200.pfb></usr/local/texlive/2016/te
xmf-dist/fonts/type1/public/cm-super/sfti1200.pfb></usr/local/texlive/2016/texm
f-dist/fonts/type1/public/cm-super/sfxc2488.pfb>
Output written on OnlineAppendixJCR_16_0025.pdf (14 pages, 565819 bytes).
PDF statistics:
 453 PDF objects out of 1000 (max. 8388607)
 367 compressed objects within 4 object streams
 48 named destinations out of 1000 (max. 500000)
 83 words of extra memory for PDF output out of 10000 (max. 10000000)
