# Supplementary material
Source: publisher figshare collection journal article supplement (https://sage.figshare.com/ndownloader/files/12974006)
Supplement: Supplementary file 1 [file 12974006 › OnlineAppendixJCR_16_0025.out]

\BOOKMARK [1][-]{appendix.A}{Robustness Checks}{}% 1
\BOOKMARK [2][-]{subsection.A.1}{Use of alternative cut-off levels for shock definition}{appendix.A}% 2
\BOOKMARK [2][-]{subsection.A.2}{Use of alternative cut-off time scale of SPEI}{appendix.A}% 3
\BOOKMARK [2][-]{subsection.A.3}{Use of alternative growing seasons}{appendix.A}% 4
\BOOKMARK [2][-]{subsection.A.4}{Use of rainfall as instrument}{appendix.A}% 5
\BOOKMARK [2][-]{subsection.A.5}{Alternative Coding and Data Sources}{appendix.A}% 6
\BOOKMARK [2][-]{subsection.A.6}{Use of relative youth bulge measure}{appendix.A}% 7
\BOOKMARK [1][-]{appendix.B}{IPUMS Data}{}% 8
\BOOKMARK [2][-]{subsection.B.1}{Effects of adjacent age groups at sub-national Level}{appendix.B}% 9
