# Supplementary material
Source: publisher figshare collection journal article supplement (https://sage.figshare.com/ndownloader/files/12974006)
Supplement: Supplementary file 1 [file 12974006 › OnlineAppendixJCR_16_0025.pdf]

# ONLINE APPENDIX

## YOUTH BULGES AND CIVIL CONFLICT: CAUSAL EVIDENCE FROM SUB-SAHARAN AFRICA

Matthias Flückiger and Markus Ludwig

### S1 Robustness Checks

Table S1.1: Correlation Coefficients - Instrument and Socioeconomic Outcomes

|               | Log GDP p.<br>Capita<br>(1) | Urbanization<br>(2) | Democracy<br>(Polity IV)<br>(3) | Real<br>Openness<br>(4) |
|---------------|-----------------------------|---------------------|---------------------------------|-------------------------|
| $S_t^{10-14}$ | -0.124<br>(0.176)           | -0.230<br>(1.988)   | 0.506<br>(1.666)                | -0.037<br>(0.122)       |
| $S_t^{15-19}$ | 0.071<br>(0.122)            | -1.852<br>(1.998)   | 1.622<br>(2.036)                | -0.150<br>(0.168)       |
| $S_t^{20-24}$ | 0.189<br>(0.165)            | -1.696<br>(1.861)   | -3.539<br>(2.185)               | 0.123<br>(0.197)        |
| Obs.          | 2,057                       | 2,193               | 1,762                           | 2,057                   |
| RMSE          | 0.199                       | 1.853               | 2.800                           | 0.264                   |

Note: \*  $p < 0.10$ , \*\*  $p < 0.05$ .  $S_t^{10-14}$  represents the drought shock measure for population group aged 10–14 defined according to Eq.(5).  $S_t^{15-19}$  and  $S_t^{20-24}$  are the shocks for age groups 15–19 and 20–24, respectively. FE estimator regressions in all columns with country dummies, country-specific time trends and regional time dummies and robust standard errors clustered at the country level in parentheses. Urbanization is the share of urban population relative to total population (WDI). Democracy is the revised combined Polity score (Polity IV database). Real GDP p. Capita and Real Openness are drawn from the FAO database.

## S1.1 Use of alternative cut-off levels for shock definition

Table S1.2: Robustness Cut-off (10th percentile): Youth Bulges and Civil Conflict Incidence: 2SLS-IV

|                                            | Civil Conflict Incidence <sub>t</sub> |                  |          | High Intensity<br>Conflict <sub>t</sub> | Low Intensity<br>Conflict <sub>t</sub> | Low Intensity<br>Incidence <sub>t</sub> | Low Intensity<br>Onset <sub>t</sub> | Low Intensity<br>Offset <sub>t</sub> |
|--------------------------------------------|---------------------------------------|------------------|----------|-----------------------------------------|----------------------------------------|-----------------------------------------|-------------------------------------|--------------------------------------|
|                                            | (OLS)                                 | (IV)             |          | (IV)                                    | (IV)                                   | (IV)                                    | (IV)                                | (IV)                                 |
|                                            | (1)                                   | (2)              | (3)      | (4)                                     | (5)                                    | (6)                                     | (7)                                 | (8)                                  |
| Log                                        | 0.090                                 | 0.137            |          |                                         |                                        |                                         |                                     |                                      |
| Population 10–14 <sub>t</sub>              | (0.259)                               | [0.930]          |          |                                         |                                        |                                         |                                     |                                      |
| Log                                        | 0.071                                 | 2.595*           | 2.413*** | 0.013                                   | 2.400***                               | 1.930***                                | 1.470***                            | -3.123                               |
| Population 15–19 <sub>t</sub>              | (0.225)                               | [0.086]          | [0.002]  | [0.978]                                 | [0.000]                                | [0.000]                                 | [0.000]                             | [0.524]                              |
| Log                                        | -0.250                                | -0.369           |          |                                         |                                        |                                         |                                     |                                      |
| Population 20–24 <sub>t</sub>              | (0.251)                               | [0.648]          |          |                                         |                                        |                                         |                                     |                                      |
| Incidence Civil<br>Conflict <sub>t-1</sub> |                                       |                  |          |                                         |                                        | 0.295***<br>(0.044)                     |                                     |                                      |
| Contemporary<br>Drought Shocks             | yes                                   | yes              | yes      | yes                                     | yes                                    | yes                                     | yes                                 | yes                                  |
| Obs.                                       | 2193                                  | 2193             | 2193     | 2193                                    | 2193                                   | 2193                                    | 1890                                | 319                                  |
| RMSE                                       | 0.280                                 | 0.318            | 0.317    | 0.198                                   | 0.300                                  | 0.277                                   | 0.213                               | 0.421                                |
| F-test excl. IV                            |                                       | 2.42, 3.63, 2.75 | 7.913    | 7.913                                   | 7.913                                  | 7.739                                   | 10.81                               | 2.757                                |
| Kleibergen-Paap                            |                                       | 0.080            | 0.039    | 0.039                                   | 0.039                                  | 0.041                                   | 0.022                               | 0.053                                |

Note: \*  $p < 0.10$ , \*\*  $p < 0.05$ , \*\*\*  $p < 0.01$ . FE estimator regressions in all columns with country dummies, country-specific time trends, regional time dummies and robust standard errors clustered at the level in parentheses. The values in brackets represent the Anderson-Rubin Chi-squared test statistic which is robust to weak instruments. In the case of multiple endogenous variables, we report the subset Anderson-Rubin test statistic for each structural parameter (Guggenberger et al., 2012). RMSE is the root mean square error. The F-test is the first-stage Angrist-Pischke test statistic of the excluded instruments. Kleibergen-Paap is the p-value of the first-stage LM statistic of the excluded instruments. The three F-test values in column (2) represent the first-stage Angrist-Pischke test statistic of the excluded instruments of the three first stage regressions. I.e., with the (log) population of the age group 10–14, 15–19 and 20–24, respectively, as the LHS variable.

Table S1.3: Robustness Cut-off (15th percentile): Youth Bulges and Civil Conflict Incidence: 2SLS-IV

|                                            | Civil Conflict Incidence <sub>t</sub> |                  |          | High Intensity        | Low Intensity         | Low Intensity          | Low Intensity      | Low Intensity       |
|--------------------------------------------|---------------------------------------|------------------|----------|-----------------------|-----------------------|------------------------|--------------------|---------------------|
|                                            | (OLS)                                 | (IV)             |          | Conflict <sub>t</sub> | Conflict <sub>t</sub> | Incidence <sub>t</sub> | Onset <sub>t</sub> | Offset <sub>t</sub> |
|                                            | (1)                                   | (2)              | (3)      | (IV)                  | (IV)                  | (IV)                   | (IV)               | (IV)                |
| Log                                        | 0.090                                 | -0.229           |          |                       |                       |                        |                    |                     |
| Population 10–14 <sub>t</sub>              | (0.259)                               | [0.838]          |          |                       |                       |                        |                    |                     |
| Log                                        | 0.071                                 | 2.453**          | 2.101*** | -0.070                | 2.176***              | 1.692***               | 1.181***           | -1.073              |
| Population 15–19 <sub>t</sub>              | (0.225)                               | [0.042]          | [0.001]  | [0.870]               | [0.000]               | [0.000]                | [0.000]            | 0.752               |
| Log                                        | -0.250                                | -0.374           |          |                       |                       |                        |                    |                     |
| Population 20–24 <sub>t</sub>              | (0.251)                               | [0.623]          |          |                       |                       |                        |                    |                     |
| Incidence Civil<br>Conflict <sub>t-1</sub> |                                       |                  |          |                       |                       | 0.298***<br>(0.044)    |                    |                     |
| Contemporary<br>Drought Shocks             | yes                                   | yes              | yes      | yes                   | yes                   | yes                    | yes                | yes                 |
| Obs.                                       | 2193                                  | 2193             | 2193     | 2193                  | 2193                  | 2193                   | 1890               | 319                 |
| RMSE                                       | 0.280                                 | 0.308            | 0.308    | 0.198                 | 0.294                 | 0.272                  | 0.206              | 0.403               |
| F-test excl. IV                            |                                       | 3.57, 4.17, 3.26 | 9.206    | 9.206                 | 9.206                 | 9.043                  | 12.22              | 4.234               |
| Kleibergen-Paap                            |                                       | 0.048            | 0.025    | 0.025                 | 0.025                 | 0.026                  | 0.015              | 0.018               |

Note: \*  $p < 0.10$ , \*\*  $p < 0.05$ , \*\*\*  $p < 0.01$ . FE estimator regressions in all columns with country dummies, country-specific time trends, regional time dummies and robust standard errors clustered at the level in parentheses. The values in brackets represent the Anderson-Rubin Chi-squared test statistic which is robust to weak instruments. In the case of multiple endogenous variables, we report the subset Anderson-Rubin test statistic for each structural parameter (Guggenberger et al., 2012). RMSE is the root mean square error. The F-test is the first-stage Angrist-Pischke test statistic of the excluded instruments. Kleibergen-Paap is the p-value of the first-stage LM statistic of the excluded instruments. The three F-test values in column (2) represent the first-stage Angrist-Pischke test statistic of the excluded instruments of the three first stage regressions. I.e., with the (log) population of the age group 10–14, 15–19 and 20–24, respectively, as the LHS variable.

Table S1.4: Robustness Cut-off (25th percentile): Youth Bulges and Civil Conflict Incidence: 2SLS-IV

|                                            | Civil Conflict Incidence <sub>t</sub> |                  |          | High Intensity        | Low Intensity         | Low Intensity          | Low Intensity      | Low Intensity       |
|--------------------------------------------|---------------------------------------|------------------|----------|-----------------------|-----------------------|------------------------|--------------------|---------------------|
|                                            | (OLS)                                 | (IV)             |          | Conflict <sub>t</sub> | Conflict <sub>t</sub> | Incidence <sub>t</sub> | Onset <sub>t</sub> | Offset <sub>t</sub> |
|                                            | (1)                                   | (2)              | (3)      | (IV)                  | (IV)                  | (IV)                   | (IV)               | (IV)                |
| Log                                        | 0.090                                 | 0.268            |          |                       |                       |                        |                    |                     |
| Population 10–14 <sub>t</sub>              | (0.259)                               | [0.819]          |          |                       |                       |                        |                    |                     |
| Log                                        | 0.071                                 | 2.762**          | 2.819*** | 0.161                 | 2.674***              | 2.056***               | 1.249***           | -1.256              |
| Population 15–19 <sub>t</sub>              | (0.225)                               | [0.017]          | [0.000]  | [0.712]               | [0.000]               | [0.000]                | [0.000]            | [0.781]             |
| Log                                        | -0.250                                | -0.097           |          |                       |                       |                        |                    |                     |
| Population 20–24 <sub>t</sub>              | (0.251)                               | [0.901]          |          |                       |                       |                        |                    |                     |
| Incidence Civil<br>Conflict <sub>t-1</sub> |                                       |                  |          |                       |                       | 0.294***<br>(0.044)    |                    |                     |
| Contemporary<br>Drought Shocks             | yes                                   | yes              | yes      | yes                   | yes                   | yes                    | yes                | yes                 |
| Obs.                                       | 2193                                  | 2193             | 2193     | 2193                  | 2193                  | 2193                   | 1890               | 319                 |
| RMSE                                       | 0.280                                 | 0.331            | 0.329    | 0.199                 | 0.307                 | 0.280                  | 0.207              | 0.404               |
| F-test excl. IV                            |                                       | 1.68, 2.39, 2.40 | 6.545    | 6.545                 | 6.545                 | 6.360                  | 8.017              | 3.062               |
| Kleibergen-Paap                            |                                       | 0.020            | 0.030    | 0.030                 | 0.030                 | 0.030                  | 0.018              | 0.026               |

Note: \*  $p < 0.10$ , \*\*  $p < 0.05$ , \*\*\*  $p < 0.01$ . FE estimator regressions in all columns with country dummies, country-specific time trends, regional time dummies and robust standard errors clustered at the level in parentheses. The values in brackets represent the Anderson-Rubin Chi-squared test statistic which is robust to weak instruments. In the case of multiple endogenous variables, we report the subset Anderson-Rubin test statistic for each structural parameter (Guggenberger et al., 2012). RMSE is the root mean square error. The F-test is the first-stage Angrist-Pischke test statistic of the excluded instruments. Kleibergen-Paap is the p-value of the first-stage LM statistic of the excluded instruments. The three F-test values in column (2) represent the first-stage Angrist-Pischke test statistic of the excluded instruments of the three first stage regressions. I.e., with the (log) population of the age group 10–14, 15–19 and 20–24, respectively, as the LHS variable.

Table S1.5: Robustness Cut-off (30th percentile): Youth Bulges and Civil Conflict Incidence: 2SLS-IV

|                                            | Civil Conflict Incidence <sub>t</sub> |                  |          | High Intensity<br>Conflict <sub>t</sub> | Low Intensity<br>Conflict <sub>t</sub> | Low Intensity<br>Incidence <sub>t</sub> | Low Intensity<br>Onset <sub>t</sub> | Low Intensity<br>Offset <sub>t</sub> |
|--------------------------------------------|---------------------------------------|------------------|----------|-----------------------------------------|----------------------------------------|-----------------------------------------|-------------------------------------|--------------------------------------|
|                                            | (OLS)                                 | (IV)             |          | (IV)                                    | (IV)                                   | (IV)                                    | (IV)                                | (IV)                                 |
|                                            | (1)                                   | (2)              | (3)      | (4)                                     | (5)                                    | (6)                                     | (7)                                 | (8)                                  |
| Log                                        | 0.090                                 | 0.681            |          |                                         |                                        |                                         |                                     |                                      |
| Population 10–14 <sub>t</sub>              | (0.259)                               | [0.600]          |          |                                         |                                        |                                         |                                     |                                      |
| Log                                        | 0.071                                 | 2.500            | 2.664*** | 0.231                                   | 2.448***                               | 1.909***                                | 1.121***                            | -3.991                               |
| Population 15–19 <sub>t</sub>              | (0.225)                               | [0.030]          | [0.002]  | [0.637]                                 | [0.001]                                | [0.000]                                 | [0.001]                             | [0.368]                              |
| Log                                        | -0.250                                | -0.081           |          |                                         |                                        |                                         |                                     |                                      |
| Population 20–24 <sub>t</sub>              | (0.251)                               | [0.921]          |          |                                         |                                        |                                         |                                     |                                      |
| Incidence Civil<br>Conflict <sub>t-1</sub> |                                       |                  |          |                                         |                                        | 0.296***<br>(0.044)                     |                                     |                                      |
| Contemporary<br>Drought Shocks             | yes                                   | yes              | yes      | yes                                     | yes                                    | yes                                     | yes                                 | yes                                  |
| Obs.                                       | 2193                                  | 2193             | 2193     | 2193                                    | 2193                                   | 2193                                    | 1890                                | 319                                  |
| RMSE                                       | 0.280                                 | 0.333            | 0.324    | 0.199                                   | 0.301                                  | 0.277                                   | 0.204                               | 0.431                                |
| F-test excl. IV                            |                                       | 1.18, 2.11, 2.34 | 5.689    | 5.689                                   | 5.689                                  | 5.517                                   | 7.164                               | 4.700                                |
| Kleibergen-Paap                            |                                       | 0.030            | 0.032    | 0.032                                   | 0.032                                  | 0.034                                   | 0.021                               | 0.012                                |

Note: \*  $p < 0.10$ , \*\*  $p < 0.05$ , \*\*\*  $p < 0.01$ . FE estimator regressions in all columns with country dummies, country-specific time trends, regional time dummies and robust standard errors clustered at the level in parentheses. The values in brackets represent the Anderson-Rubin Chi-squared test statistic which is robust to weak instruments. In the case of multiple endogenous variables, we report the subset Anderson-Rubin test statistic for each structural parameter (Guggenberger et al., 2012). RMSE is the root mean square error. The F-test is the first-stage Angrist-Pischke test statistic of the excluded instruments. Kleibergen-Paap is the p-value of the first-stage LM statistic of the excluded instruments. The three F-test values in column (2) represent the first-stage Angrist-Pischke test statistic of the excluded instruments of the three first stage regressions. I.e., with the (log) population of the age group 10–14, 15–19 and 20–24, respectively, as the LHS variable.

## S1.2 Use of alternative cut-off time scale of SPEI

Table S1.6: Robustness Time Scale SPEI (3 months): Youth Bulges and Civil Conflict Incidence: 2SLS-IV

|                                            | Civil Conflict Incidence <sub>t</sub> |                  |          | High Intensity<br>Conflict <sub>t</sub> | Low Intensity<br>Conflict <sub>t</sub> | Low Intensity<br>Incidence <sub>t</sub> | Low Intensity<br>Onset <sub>t</sub> | Low Intensity<br>Offset <sub>t</sub> |
|--------------------------------------------|---------------------------------------|------------------|----------|-----------------------------------------|----------------------------------------|-----------------------------------------|-------------------------------------|--------------------------------------|
|                                            | (OLS)                                 | (IV)             |          | (IV)                                    | (IV)                                   | (IV)                                    | (IV)                                | (IV)                                 |
|                                            | (1)                                   | (2)              | (3)      | (4)                                     | (5)                                    | (6)                                     | (7)                                 | (8)                                  |
| Log                                        | 0.090                                 | 0.216            |          |                                         |                                        |                                         |                                     |                                      |
| Population 10–14 <sub>t</sub>              | (0.259)                               | [0.874]          |          |                                         |                                        |                                         |                                     |                                      |
| Log                                        | 0.071                                 | 1.517            | 1.834*** | -0.143                                  | 1.986***                               | 1.558***                                | 1.049***                            | -1.419                               |
| Population 15–19 <sub>t</sub>              | (0.225)                               | [0.254]          | [0.009]  | [0.743]                                 | [0.001]                                | [0.001]                                 | [0.000]                             | [0.688]                              |
| Log                                        | -0.250                                | 0.293            |          |                                         |                                        |                                         |                                     |                                      |
| Population 20–24 <sub>t</sub>              | (0.251)                               | [0.685]          |          |                                         |                                        |                                         |                                     |                                      |
| Incidence Civil<br>Conflict <sub>t-1</sub> |                                       |                  |          |                                         |                                        | 0.299***<br>(0.044)                     |                                     |                                      |
| Contemporary<br>Drought Shocks             | yes                                   | yes              | yes      | yes                                     | yes                                    | yes                                     | yes                                 | yes                                  |
| Obs.                                       | 2193                                  | 2193             | 2193     | 2193                                    | 2193                                   | 2193                                    | 1890                                | 319                                  |
| RMSE                                       | 0.280                                 | 0.303            | 0.302    | 0.197                                   | 0.289                                  | 0.269                                   | 0.203                               | 0.405                                |
| F-test excl. IV                            |                                       | 2.53, 4.12, 3.50 | 9.302    | 9.302                                   | 9.302                                  | 9.144                                   | 12.27                               | 3.583                                |
| Kleibergen-Paap                            |                                       | 0.025            | 0.027    | 0.027                                   | 0.0276                                 | 0.028                                   | 0.016                               | 0.024                                |

Note: \*  $p < 0.10$ , \*\*  $p < 0.05$ , \*\*\*  $p < 0.01$ . FE estimator regressions in all columns with country dummies, country-specific time trends, regional time dummies and robust standard errors clustered at the level in parentheses. The values in brackets represent the Anderson-Rubin Chi-squared test statistic which is robust to weak instruments. In the case of multiple endogenous variables, we report the subset Anderson-Rubin test statistic for each structural parameter (Guggenberger et al., 2012). RMSE is the root mean square error. The F-test is the first-stage Angrist-Pischke test statistic of the excluded instruments. Kleibergen-Paap is the p-value of the first-stage LM statistic of the excluded instruments. The three F-test values in column (2) represent the first-stage Angrist-Pischke test statistic of the excluded instruments of the three first stage regressions. I.e., with the (log) population of the age group 10–14, 15–19 and 20–24, respectively, as the LHS variable.

Table S1.7: Robustness Time Scale SPEI (5 months): Youth Bulges and Civil Conflict Incidence: 2SLS-IV

|                                            | Civil Conflict Incidence <sub>t</sub> |                  |          | High Intensity<br>Conflict <sub>t</sub> | Low Intensity<br>Conflict <sub>t</sub> | Low Intensity<br>Incidence <sub>t</sub> | Low Intensity<br>Onset <sub>t</sub> | Low Intensity<br>Offset <sub>t</sub> |
|--------------------------------------------|---------------------------------------|------------------|----------|-----------------------------------------|----------------------------------------|-----------------------------------------|-------------------------------------|--------------------------------------|
|                                            | (OLS)                                 | (IV)             |          | (IV)                                    | (IV)                                   | (IV)                                    | (IV)                                | (IV)                                 |
|                                            | (1)                                   | (2)              | (3)      | (4)                                     | (5)                                    | (6)                                     | (7)                                 | (8)                                  |
| Log                                        | 0.090                                 | 0.203            |          |                                         |                                        |                                         |                                     |                                      |
| Population 10–14 <sub>t</sub>              | (0.259)                               | [0.878]          |          |                                         |                                        |                                         |                                     |                                      |
| Log                                        | 0.071                                 | 2.689**          | 2.706*** | 0.114                                   | 2.596***                               | 1.968***                                | 1.339***                            | 0.859                                |
| Population 15–19 <sub>t</sub>              | (0.225)                               | [0.028]          | [0.000]  | [0.801]                                 | [0.000]                                | [0.000]                                 | [0.000]                             | [0.834]                              |
| Log                                        | -0.250                                | -0.090           |          |                                         |                                        |                                         |                                     |                                      |
| Population 20–24 <sub>t</sub>              | (0.251)                               | [0.912]          |          |                                         |                                        |                                         |                                     |                                      |
| Incidence Civil<br>Conflict <sub>t-1</sub> |                                       |                  |          |                                         |                                        | 0.295***<br>(0.044)                     |                                     |                                      |
| Contemporary<br>Drought Shocks             | yes                                   | yes              | yes      | yes                                     | yes                                    | yes                                     | yes                                 | yes                                  |
| Obs.                                       | 2193                                  | 2193             | 2193     | 2193                                    | 2193                                   | 2193                                    | 1890                                | 319                                  |
| RMSE                                       | 0.280                                 | 0.328            | 0.326    | 0.198                                   | 0.305                                  | 0.278                                   | 0.209                               | 0.396                                |
| F-test excl. IV                            |                                       | 1.33, 2.59, 3.07 | 6.946    | 6.946                                   | 6.946                                  | 6.759                                   | 8.062                               | 4.815                                |
| Kleibergen-Paap                            |                                       | 0.056            | 0.023    | 0.023                                   | 0.023                                  | 0.025                                   | 0.017                               | 0.008                                |

Note: \*  $p < 0.10$ , \*\*  $p < 0.05$ , \*\*\*  $p < 0.01$ . FE estimator regressions in all columns with country dummies, country-specific time trends, regional time dummies and robust standard errors clustered at the level in parentheses. The values in brackets represent the Anderson-Rubin Chi-squared test statistic which is robust to weak instruments. In the case of multiple endogenous variables, we report the subset Anderson-Rubin test statistic for each structural parameter (Guggenberger et al., 2012). RMSE is the root mean square error. The F-test is the first-stage Angrist-Pischke test statistic of the excluded instruments. Kleibergen-Paap is the p-value of the first-stage LM statistic of the excluded instruments. The three F-test values in column (2) represent the first-stage Angrist-Pischke test statistic of the excluded instruments of the three first stage regressions. I.e., with the (log) population of the age group 10–14, 15–19 and 20–24, respectively, as the LHS variable.

### S1.3 Use of alternative growing seasons

Table S1.8: Robustness Growing Season (All months included): Youth Bulges and Civil Conflict Incidence: 2SLS-IV

|                                            | Civil Conflict Incidence <sub>t</sub> |                  |         | High Intensity<br>Conflict <sub>t</sub> | Low Intensity<br>Conflict <sub>t</sub> | Low Intensity<br>Incidence <sub>t</sub> | Low Intensity<br>Onset <sub>t</sub> | Low Intensity<br>Offset <sub>t</sub> |
|--------------------------------------------|---------------------------------------|------------------|---------|-----------------------------------------|----------------------------------------|-----------------------------------------|-------------------------------------|--------------------------------------|
|                                            | (OLS)                                 | (IV)             |         | (IV)                                    | (IV)                                   | (IV)                                    | (IV)                                | (IV)                                 |
|                                            | (1)                                   | (2)              | (3)     | (4)                                     | (5)                                    | (6)                                     | (7)                                 | (8)                                  |
| Log                                        | 0.090                                 | -0.039           |         |                                         |                                        |                                         |                                     |                                      |
| Population 10–14 <sub>t</sub>              | (0.259)                               | [0.998]          |         |                                         |                                        |                                         |                                     |                                      |
| Log                                        | 0.071                                 | 2.093            | 3.219** | 1.044                                   | 2.166*                                 | 1.855*                                  | 1.294***                            | 45.204                               |
| Population 15–19 <sub>t</sub>              | (0.225)                               | [0.835]          | [0.029] | [0.334]                                 | [0.093]                                | [0.052]                                 | [0.003]                             | [0.125]                              |
| Log                                        | -0.250                                | 2.946            |         |                                         |                                        |                                         |                                     |                                      |
| Population 20–24 <sub>t</sub>              | (0.251)                               | [0.803]          |         |                                         |                                        |                                         |                                     |                                      |
| Incidence Civil<br>Conflict <sub>t-1</sub> |                                       |                  |         |                                         |                                        | 0.296***<br>(0.048)                     |                                     |                                      |
| Contemporary<br>Drought Shocks             | yes                                   | yes              | yes     | yes                                     | yes                                    | yes                                     | yes                                 | yes                                  |
| Obs.                                       | 2193                                  | 2193             | 2193    | 2193                                    | 2193                                   | 2193                                    | 1890                                | 319                                  |
| RMSE                                       | 0.280                                 | 0.404            | 0.343   | 0.212                                   | 0.294                                  | 0.275                                   | 0.208                               | 1.513                                |
| F-test excl. IV                            |                                       | 0.63, 1.34, 0.80 | 1.500   | 1.500                                   | 1.500                                  | 1.459                                   | 3.434                               | 0.095                                |
| Kleibergen-Paap                            |                                       | 0.858            | 0.210   | 0.210                                   | 0.210                                  | 0.216                                   | 0.072                               | 0.634                                |

Note: \*  $p < 0.10$ , \*\*  $p < 0.05$ , \*\*\*  $p < 0.01$ . FE estimator regressions in all columns with country dummies, country-specific time trends, regional time dummies and robust standard errors clustered at the level in parentheses. The values in brackets represent the Anderson-Rubin Chi-squared test statistic which is robust to weak instruments. In the case of multiple endogenous variables, we report the subset Anderson-Rubin test statistic for each structural parameter (Guggenberger et al., 2012). RMSE is the root mean square error. The F-test is the first-stage Angrist-Pischke test statistic of the excluded instruments. Kleibergen-Paap is the p-value of the first-stage LM statistic of the excluded instruments. The three F-test values in column (2) represent the first-stage Angrist-Pischke test statistic of the excluded instruments of the three first stage regressions. I.e., with the (log) population of the age group 10–14, 15–19 and 20–24, respectively, as the LHS variable.

Table S1.9: Robustness Growing Season (Vrieling et al., 2013): Youth Bulges and Civil Conflict Incidence: 2SLS-IV

|                                            | Civil Conflict Incidence <sub>t</sub> |                  |          | High Intensity<br>Conflict <sub>t</sub> | Low Intensity<br>Conflict <sub>t</sub> | Low Intensity<br>Incidence <sub>t</sub> | Low Intensity<br>Onset <sub>t</sub> | Low Intensity<br>Offset <sub>t</sub> |
|--------------------------------------------|---------------------------------------|------------------|----------|-----------------------------------------|----------------------------------------|-----------------------------------------|-------------------------------------|--------------------------------------|
|                                            | (OLS)                                 | (IV)             |          | (IV)                                    | (IV)                                   | (IV)                                    | (IV)                                | (IV)                                 |
|                                            | (1)                                   | (2)              | (3)      | (4)                                     | (5)                                    | (6)                                     | (7)                                 | (8)                                  |
| Log                                        | 0.090                                 | -0.365           |          |                                         |                                        |                                         |                                     |                                      |
| Population 10–14 <sub>t</sub>              | (0.259)                               | [0.808]          |          |                                         |                                        |                                         |                                     |                                      |
| Log                                        | 0.071                                 | 2.114            | 2.654*** | 0.587                                   | 2.088***                               | 1.681***                                | 1.232***                            | -1.772                               |
| Population 15–19 <sub>t</sub>              | (0.225)                               | [0.179]          | [0.002]  | [0.315]                                 | [0.001]                                | [0.001]                                 | [0.000]                             | [0.813]                              |
| Log                                        | -0.250                                | 0.992            |          |                                         |                                        |                                         |                                     |                                      |
| Population 20–24 <sub>t</sub>              | (0.251)                               | [0.307]          |          |                                         |                                        |                                         |                                     |                                      |
| Incidence Civil<br>Conflict <sub>t-1</sub> |                                       |                  |          |                                         |                                        | 0.298***<br>(0.044)                     |                                     |                                      |
| Contemporary<br>Drought Shocks             | yes                                   | yes              | yes      | yes                                     | yes                                    | yes                                     | yes                                 | yes                                  |
| Obs.                                       | 2193                                  | 2193             | 2193     | 2193                                    | 2193                                   | 2193                                    | 1890                                | 319                                  |
| RMSE                                       |                                       |                  |          |                                         |                                        | (0.044)                                 |                                     |                                      |
| F-test excl. IV                            |                                       | 1.88, 2.57, 1.19 | 4.632    | 4.632                                   | 4.632                                  | 4.519                                   | 7.170                               | 1.932                                |
| Kleibergen-Paap                            |                                       | 0.044            | 0.078    | 0.078                                   | 0.078                                  | 0.082                                   | 0.042                               | 0.078                                |

Note: \*  $p < 0.10$ , \*\*  $p < 0.05$ , \*\*\*  $p < 0.01$ . FE estimator regressions in all columns with country dummies, country-specific time trends, regional time dummies and robust standard errors clustered at the level in parentheses. The values in brackets represent the Anderson-Rubin Chi-squared test statistic which is robust to weak instruments. In the case of multiple endogenous variables, we report the subset Anderson-Rubin test statistic for each structural parameter (Guggenberger et al., 2012). RMSE is the root mean square error. The F-test is the first-stage Angrist-Pischke test statistic of the excluded instruments. Kleibergen-Paap is the p-value of the first-stage LM statistic of the excluded instruments. The three F-test values in column (2) represent the first-stage Angrist-Pischke test statistic of the excluded instruments of the three first stage regressions. I.e., with the (log) population of the age group 10–14, 15–19 and 20–24, respectively, as the LHS variable.

## S1.4 Use of rainfall as instrument

Table S1.10: Robustness Rainfall Instrument: Youth Bulges and Civil Conflict Incidence: 2SLS-IV

|                                            | Civil Conflict Incidence <sub>t</sub> |                   |                    | High Intensity<br>Conflict <sub>t</sub> | Low Intensity<br>Conflict <sub>t</sub> | Low Intensity<br>Incidence <sub>t</sub> | Low Intensity<br>Onset <sub>t</sub> | Low Intensity<br>Offset <sub>t</sub> |
|--------------------------------------------|---------------------------------------|-------------------|--------------------|-----------------------------------------|----------------------------------------|-----------------------------------------|-------------------------------------|--------------------------------------|
|                                            | (OLS)                                 | (IV)              |                    | (IV)                                    | (IV)                                   | (IV)                                    | (IV)                                | (IV)                                 |
|                                            | (1)                                   | (2)               | (3)                | (4)                                     | (5)                                    | (6)                                     | (7)                                 | (8)                                  |
| Log<br>Population 10–14 <sub>t</sub>       | 0.106<br>(0.255)                      | -1.506<br>[0.502] |                    |                                         |                                        |                                         |                                     |                                      |
| Log<br>Population 15–19 <sub>t</sub>       | 0.077<br>(0.219)                      | 2.250<br>[0.457]  | 1.969**<br>[0.037] | -0.294<br>[0.619]                       | 2.206**<br>[0.016]                     | 1.785**<br>[0.020]                      | 1.618***<br>[0.007]                 | 1.114<br>[0.726]                     |
| Log<br>Population 20–24 <sub>t</sub>       | -0.244<br>(0.253)                     | 0.888<br>[0.695]  |                    |                                         |                                        |                                         |                                     |                                      |
| Incidence Civil<br>Conflict <sub>t-1</sub> |                                       |                   |                    |                                         |                                        | 0.295***<br>(0.044)                     |                                     |                                      |
| Contemporary<br>Drought Shocks             | yes                                   | yes               | yes                | yes                                     | yes                                    | yes                                     | yes                                 | yes                                  |
| Obs.                                       | 2193                                  | 2193              | 2193               | 2193                                    | 2193                                   | 2193                                    | 1890                                | 319                                  |
| RMSE                                       | 0.279                                 | 0.318             | 0.304              | 0.197                                   | 0.294                                  | 0.273                                   | 0.217                               | 0.395                                |
| F-test excl. IV                            |                                       | 1.47, 2.54, 2.98  | 6.530              | 6.530                                   | 6.530                                  | 6.344                                   | 6.230                               | 2.323                                |
| Kleibergen-Paap                            |                                       | 0.133             | 0.011              | 0.011                                   | 0.011                                  | 0.012                                   | 0.011                               | 0.039                                |

Note: \*  $p < 0.10$ , \*\*  $p < 0.05$ , \*\*\*  $p < 0.01$ . FE estimator regressions in all columns with country dummies, country-specific time trends, regional time dummies and robust standard errors clustered at the level in parentheses. The values in brackets represent the Anderson-Rubin Chi-squared test statistic which is robust to weak instruments. In the case of multiple endogenous variables, we report the subset Anderson-Rubin test statistic for each structural parameter (Guggenberger et al., 2012). RMSE is the root mean square error. The F-test is the first-stage Angrist-Pischke test statistic of the excluded instruments. Kleibergen-Paap is the p-value of the first-stage LM statistic of the excluded instruments. The three F-test values in column (2) represent the first-stage Angrist-Pischke test statistic of the excluded instruments of the three first stage regressions. I.e., with the (log) population of the age group 10–14, 15–19 and 20–24, respectively, as the LHS variable. The instrument is constructed as the average (log) amount of birth year rainfall for each age group. The rainfall data are drawn from Schneider et al. (2011).

## S1.5 Alternative Coding and Data Sources

Table S1.11: Robustness 2SLS-IV - Alternative Onset/Offset Coding and Alternative Conflict Data

|                                            | Onset<br>Civil Conflict <sub>t</sub> |                      | Offset<br>Civil Conflict <sub>t</sub> |                     | Any Coup <sup>c</sup> |
|--------------------------------------------|--------------------------------------|----------------------|---------------------------------------|---------------------|-----------------------|
|                                            | (1) <sup>a</sup>                     | (2) <sup>b</sup>     | (3) <sup>a</sup>                      | (4) <sup>b</sup>    | (5)                   |
| Log                                        | 1.325***                             | 1.712***             | 0.446                                 | -0.092              | 1.526**               |
| Population 15–19 <sub>t</sub>              | [0.000]                              | [0.000]              | [0.930]                               | [0.747]             | [0.021]               |
| Incidence Civil<br>Conflict <sub>t-1</sub> |                                      | -0.221***<br>(0.037) |                                       | 0.482***<br>(0.044) |                       |
| Contemporary<br>Drought Shocks             | yes                                  | yes                  | yes                                   | yes                 | yes                   |
| Obs.                                       | 1,818                                | 2,193                | 205                                   | 2,193               | 2,012                 |
| RMSE                                       | 0.209                                | 0.233                | 0.409                                 | 0.160               | 0.267                 |
| F-test excl. IV                            | 11.28                                | 8.362                | 2.645                                 | 8.362               | 2.630                 |
| Kleibergen-Paap                            | 0.207                                | 0.227                | 0.391                                 | 0.160               | 0.268                 |

Note: \*\*  $p < 0.05$ , \*\*\*  $p < 0.01$ . FE estimator regressions in all columns with country dummies, country-specific time trends, regional time dummies and robust standard errors clustered at the level in parentheses. The values in brackets represent the Anderson-Rubin Chi-squared test statistic which is robust to weak instruments. RMSE is the root mean square error. The F-test is the first-stage Angrist-Pischke test statistic of the excluded instruments. Kleibergen-Paap is the p-value of the first-stage LM statistic of the excluded instruments.

<sup>a</sup> Onset (offset) is coded following Miguel et al. (2004), where continued periods of conflict (peace) as well as the onset of peace (conflict) is coded as missing.

<sup>b</sup> Onset (offset) is coded following Fearon and Laitin (2003), where all onsets (offsets) are coded as one, and zero otherwise. In the regression, we the control for lagged conflict.

<sup>c</sup> Information regarding coup d'état attempts are drawn from Powell and Thyne (2011).

## S1.6 Use of relative youth bulge measure

Table S1.12: Robustness: Relative Youth Bulge Measure

|                                            | Civil Conflict Incidence <sub>t</sub><br>(IV)<br>(1) | High Intensity<br>Conflict <sub>t</sub><br>(IV)<br>(2) | Low Intensity<br>Conflict <sub>t</sub><br>(IV)<br>(3) | Low Intensity<br>Incidence <sub>t</sub><br>(IV)<br>(4) | Low Intensity<br>Onset <sub>t</sub><br>(IV)<br>(5) | Low Intensity<br>Offset <sub>t</sub><br>(IV)<br>(6) |
|--------------------------------------------|------------------------------------------------------|--------------------------------------------------------|-------------------------------------------------------|--------------------------------------------------------|----------------------------------------------------|-----------------------------------------------------|
| Population<br>Share 15–19 <sub>t</sub>     | 6.786***<br>[0.000]                                  | -0.147<br>[0.909]                                      | 6.963***<br>[0.000]                                   | 5.418***<br>[0.000]                                    | 3.651***<br>[0.000]                                | 0.240<br>[0.964]                                    |
| Incidence Civil<br>Conflict <sub>t-1</sub> |                                                      |                                                        |                                                       | 0.286***<br>(0.050)                                    |                                                    |                                                     |
| Contemporary<br>Drought Shocks             | yes                                                  | yes                                                    | yes                                                   | yes                                                    | yes                                                | yes                                                 |
| Obs.                                       | 2193                                                 | 2193                                                   | 2193                                                  | 2193                                                   | 1890                                               | 319                                                 |
| RMSE                                       | 0.315                                                | 0.198                                                  | 0.310                                                 | 0.283                                                  | 0.210                                              | 0.398                                               |
| F-test excl. IV                            | 3.520                                                | 3.520                                                  | 3.520                                                 | 3.315                                                  | 3.168                                              | 4.415                                               |
| Kleibergen-Paap                            | 0.070                                                | 0.070                                                  | 0.070                                                 | 0.078                                                  | 0.085                                              | 0.056                                               |

Note: \*  $p < 0.10$ , \*\*  $p < 0.05$ , \*\*\*  $p < 0.01$ . FE estimator regressions in all columns with country dummies, country-specific time trends, regional time dummies and robust standard errors clustered at the level in parentheses. The values in brackets represent the Anderson-Rubin Chi-squared test statistic which is robust to weak instruments. In the case of multiple endogenous variables, we report the subset Anderson-Rubin test statistic for each structural parameter (Guggenberger et al., 2012). RMSE is the root mean square error. The F-test is the first-stage Angrist-Pischke test statistic of the excluded instruments. Kleibergen-Paap is the p-value of the first-stage LM statistic of the excluded instruments. Population Share 15–19<sub>t</sub> refers to the number of 15–19 year olds relative to the adult population (30+)

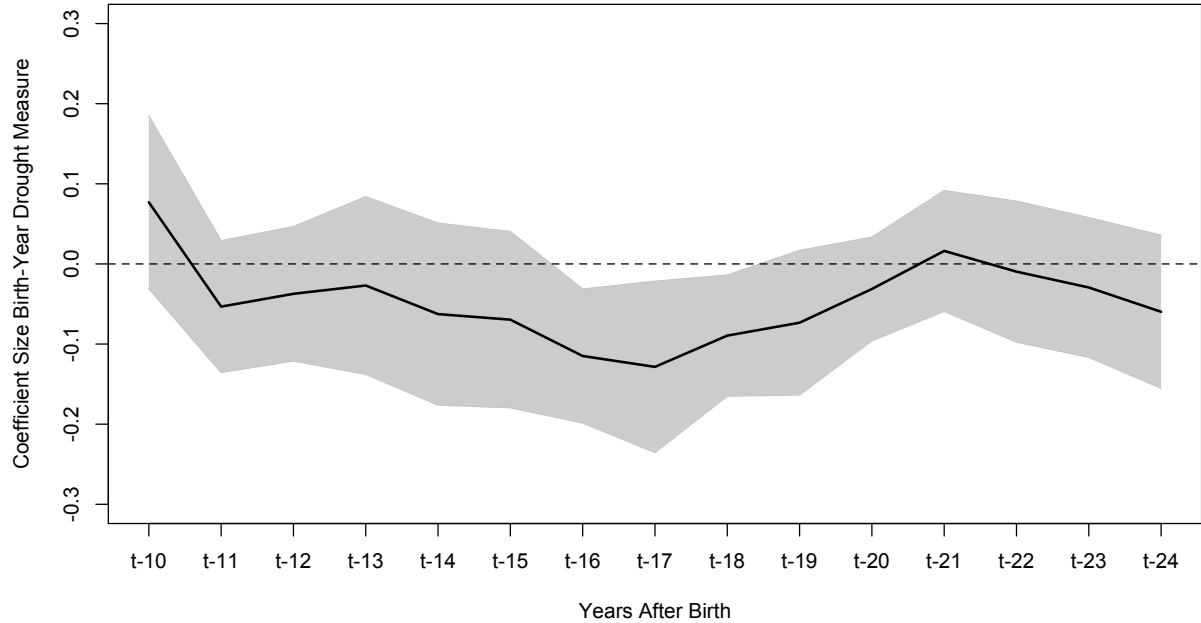

Figure S1.1: Graph depicts the effect of the individual birth year shocks  $t - 10$  to  $t - 24$  on the risk of conflict incidence (defined in Eq.(4)). The shaded represents the 90 percent confidence interval.

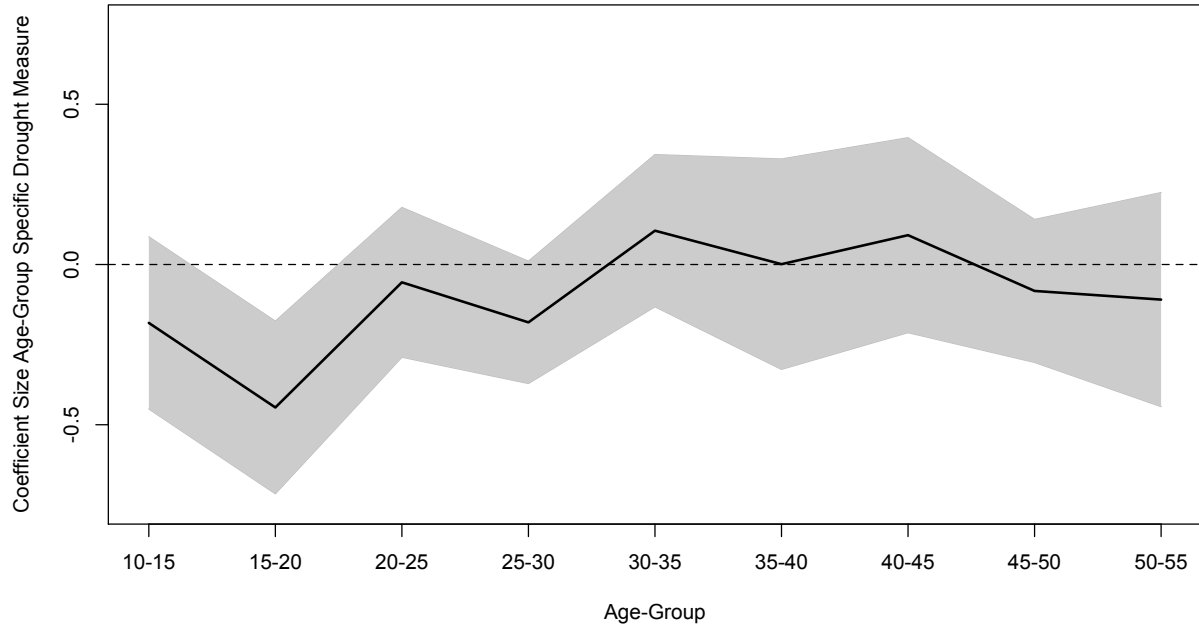

Figure S1.2: Graph depicts the effects of the age-group specific drought measures on the risk of conflict incidence (defined in Eq.(5)). The shaded represents the 90 percent confidence interval.

## S2 IPUMS Data

To construct age group specific unemployment rate and school attainment levels at the sub-national level, we use harmonized, regionally representative survey information provided by the IPUMS-international database (Minnesota Population Center, 2004).

We build the region-level outcome variables by computing the weighted average over all the individuals that pertain to the age group of interest. The weights are provided by IPUMS. For example, we construct the unemployment rate of the age group 15–19 in the following manner: In a first step, we restrict the sample to persons aged 15–19. Second, we construct an indicator variable capturing whether a person is employed or not. In the last step, we compute the weighted average of this unemployment indicator for each region and year. The regional-level average number of years of schooling is constructed analogously. To compute the population size of group aged 15–19, we simply sum the sampling weights provided by IPUMS within each year and region.

Apart from providing individual level information regarding employment and schooling status, the database also reports in which region of a country an individual lives in. For each of these regions, IPUMS provides polygons which enables us to construct the region-specific drought-shock measure defined in Section 4. The drought data are then matched to the regional level outcome variable.

To construct the conflict onset indicator, we use the geocoded conflict data from the UCDP GED Conflict Polygons (Croicu and Sundberg, 2012). This geocoded dataset is available for the time period 1989–2010. Using this data we can determine whether a conflict occurred in a given region and year.

The final dataset spans the years 1989–2010 and contains 136 sub-national regions of 11 countries. These countries are: Burkina Faso, Ghana, Kenya, Malawi, Mali, Mozambique, Nigeria, Rwanda, South Africa, Uganda, and Zambia.

## S2.1 Effects of adjacent age groups at sub-national Level

Table S2.1: Robustness Adjacent Age Groups: Mechanism

|               | Conflict Incidence <sub>t</sub> |                  | Unemployment Population 10–14 <sub>t</sub> | Unemployment Population 20–24 <sub>t</sub> | Unemployment Population 15–65 <sub>t</sub> |                   | Log Years of Schooling Population 10–14 <sub>t</sub> | Log Years of Schooling Population 20–24 <sub>t</sub> |
|---------------|---------------------------------|------------------|--------------------------------------------|--------------------------------------------|--------------------------------------------|-------------------|------------------------------------------------------|------------------------------------------------------|
|               | (1)                             | (2)              | (3)                                        | (4)                                        | (5)                                        | (6)               | (7)                                                  | (8)                                                  |
| $S_t^{10-14}$ | -0.282<br>(0.309)               |                  | 0.019<br>(0.074)                           |                                            | 0.022<br>(0.015)                           |                   | -0.096<br>(0.089)                                    |                                                      |
| $S_t^{20-24}$ |                                 | 0.012<br>(0.294) |                                            | -0.019<br>(0.040)                          |                                            | -0.018<br>(0.017) |                                                      | -0.126<br>(0.206)                                    |
| Obs.          | 388                             | 388              | 374                                        | 388                                        | 388                                        | 388               | 336                                                  | 336                                                  |
| RMSE          | 0.353                           | 0.354            | 0.135                                      | 0.0535                                     | 0.0176                                     | 0.0176            | 0.119                                                | 0.180                                                |

Note: \*  $p < 0.10$ , \*\*  $p < 0.05$ , \*\*\*  $p < 0.01$ .  $S_t^{10-14}$  ( $S_t^{20-24}$ ) represents the drought shock measure for population group aged 10–14 (20–24) defined according to Eq.(??). FE estimator regressions in all columns with country dummies, country-specific time trends, regional time dummies and robust standard errors clustered at the level in parentheses.

## References

Croicu, Mihai, and Ralph Sundberg (2012) ‘UCDP GED Conflict Polygons dataset version 1.1-2011.’ Technical Report, Department of Peace and Conflict Research, Uppsala

University

- Fearon, James D., and David D. Laitin (2003) 'Ethnicity, insurgency, and civil war.' *American Political Science Review* 97(1), 75–90
- Guggenberger, Patrik, Frank Kleibergen, Sophocles Mavroeidis, and Linchun Chen (2012) 'On the asymptotic sizes of subset anderson-rubin and lagrange multiplier tests in linear instrumental variables regression.' *Econometrica* 80(6), 2649–2666
- Miguel, Edward, Shanker Satyanath, and Ernest Sergenti (2004) 'Economic shocks and civil conflict: An instrumental variables approach.' *Journal of Political Economy* 112(4), 725–753
- Minnesota Population Center (2004) *Integrated Public Use Microdata Series, International: Version 6.3* University of Minnesota (Minneapolis)
- Powell, Jonathan M, and Clayton L Thyne (2011) 'Global instances of coups from 1950 to 2010: A new dataset.' *Journal of Peace Research* 48(2), 249–259
- Schneider, Udo, Andreas Becker, Peter Finger, Anja Meyer-Christoffer, Bruno Rudolf, and Markus Ziese (2011) 'GPCC full data reanalysis version 6.0 at 1.0°: Monthly land-surface precipitation from rain-gauges built on GTS-based and historic data.'
- Vrieling, Anton, Jan de Leeuw, and Mohammed Y. Said (2013) 'Length of growing period over africa: Variability and trends from 30 years of ndvi time series.' *Remote Sensing* 5(2), 982
