# Supplementary material
Source: publisher figshare collection journal article supplement (https://sage.figshare.com/ndownloader/files/12974006)
Supplement: Supplementary file 1 [file 12974006 › OnlineAppendixJCR_16_0025.tex]

\documentclass[12pt]{article}
\usepackage{multirow}
\usepackage[T1]{fontenc}
\usepackage{amsfonts}
\usepackage{amsthm}
\usepackage{amsmath}
\usepackage{relsize}
\usepackage{latexsym}
\usepackage{enumerate}
\usepackage{natbib}
\usepackage{endnotes}
\usepackage{pdflscape}
\usepackage{appendix}
\usepackage{nicefrac}
\usepackage{caption}
\setlength{\parindent}{0cm}
\setlength{\parskip}{0.1cm}
\usepackage{booktabs}
\usepackage{chngcntr}
\usepackage{float}
\usepackage{setspace}
\usepackage[left=1in,top=1in,right=1in,bottom=1in,nohead]{geometry}
\usepackage[hyperfootnotes=false]{hyperref}
\usepackage{gensymb}


\usepackage{lscape}
\usepackage{pdflscape}
\usepackage{epsfig}

\newtheorem{prop}{Proposition}
\newtheorem{cor}{Corollary}
\newtheorem{lem}{Lemma}


\DeclareMathOperator{\rank}{rank}


\DeclareMathOperator{\amax}{argmax}

\renewcommand*\thetable{\Roman{table}}
\renewcommand*\thefigure{\Roman{figure}}

\usepackage{titling}
\setlength{\droptitle}{-60pt}


\defcitealias{CIA}{CIA, 2013}
\doublespace
\title{Youth Bulges and Civil Conflict:\\ Causal Evidence from Sub-Saharan Africa\thanks{We thank Frank Krysiak, Michael Wagner,  Hermione Miller-Moser, and Daniel M\"{u}ller  for helpful discussions and comments. }}
\date{\today}


\author{Matthias Fl\"{u}ckiger\thanks{Contact Address: University of Basel, Faculty of Business and Economics, Peter-Merian-Weg 6,
Postfach, 4002 Basel, Switzerland. Email: \url{matthias.flueckiger@unibas.ch}}\\ 
University of Basel \and Markus Ludwig\thanks{Contact Address: University of Basel, Faculty of Business and Economics, Peter-Merian-Weg 6,
Postfach, 4002 Basel, Switzerland. Email: \url{markus.ludwig@unibas.ch}}\\ 
University of Basel}


\renewcommand\appendixname{Online Appendix}

\begin{document}
\begin{center}
{\huge \bf \textsc{Online Appendix}}\\[1em]
{\large \textsc{Youth Bulges and Civil Conflict:\\ Causal Evidence from Sub-Saharan Africa}}\\[1em]
Matthias Fl\"{u}ckiger and Markus Ludwig
\end{center}

\appendix
\renewcommand{\thepage}{S\arabic{page}}  
\renewcommand{\thesection}{S\arabic{section}}   
\renewcommand*\thetable{S\Roman{table}}
\renewcommand*\thefigure{S\Roman{figure}}
\counterwithin{table}{section}
\counterwithin{figure}{section}
\counterwithin{equation}{section}
\section{Robustness Checks}\label{s:robustness}
\makeatletter{}\makeatletter{}\begin{table}[H]\centering \footnotesize
\def\sym#1{\ifmmode^{#1}\else\(^{#1}\)\fi}
\caption{Correlation Coefficients - Instrument and Socioeconomic Outcomes}
\label{TaCorr}
\begin{tabular}{l*{4}{c}}
\toprule
&\multicolumn{1}{c}{Log GDP p.}&\multicolumn{1}{c}{Urbanization}&\multicolumn{1}{c}{Democracy}&\multicolumn{1}{c}{Real} \\
&\multicolumn{1}{c}{Capita}&\multicolumn{1}{c}{}&\multicolumn{1}{c}{(Polity IV)}&\multicolumn{1}{c}{Openness}\\
 &\multicolumn{1}{c}{(1)}&\multicolumn{1}{c}{(2)}&\multicolumn{1}{c}{(3)}&\multicolumn{1}{c}{(4)}\\
\cmidrule(r){2-2} \cmidrule(lr){3-3} \cmidrule(lr){4-4} \cmidrule(lr){5-5} 
S$^{10-14}_t$ &-0.124 & -0.230 & 0.506 & -0.037 \\ 
          &(0.176) & (1.988) & (1.666) & (0.122) \\ 
[0.5em]
S$^{15-19}_t$  &0.071 & -1.852 & 1.622 & -0.150 \\ 
 & (0.122) & (1.998) & (2.036) & (0.168) \\ 
[0.5em]
S$^{20-24}_t$&0.189 & -1.696 & -3.539 & 0.123 \\ 
 &(0.165) & (1.861) & (2.185) & (0.197) \\ 
\midrule
Obs.      &2,057 & 2,193 & 1,762 & 2,057 \\ 
RMSE      & 0.199 & 1.853 & 2.800 & 0.264 \\ 
\bottomrule
\end{tabular}
\begin{tabular}{p{16cm}}
\scriptsize{Note: * \(p<0.10\), ** \(p<0.05\). S$^{10-14}_t$ represents the drought shock measure for population group aged 10--14 defined according to Eq.(5). S$^{15-19}_t$ and S$^{20-24}_t$ are the shocks for age groups 15--19 and 20--24, respectively. FE estimator regressions in all columns with country dummies, country-specific time trends and regional time dummies and robust standard errors clustered at the country level in parentheses. Urbanization is the share of urban population relative to total population (WDI). Democracy is the revised combined Polity score  (Polity IV database). Real GDP p. Capita and Real Openness are drawn from the FAO database.
 } \\
\end{tabular}
\end{table}
 

\clearpage
\subsection{Use of alternative cut-off levels for shock definition}
\makeatletter{}\begin{table}[ht]\centering \footnotesize
\def\sym#1{\ifmmode^{#1}\else\(^{#1}\)\fi}
\caption{\small Robustness Cut-off (10th percentile): Youth Bulges and Civil Conflict Incidence: 2SLS-IV}
\label{TaICO15}
\resizebox{\linewidth}{!}{
\begin{tabular}{l*{8}{c}}
\toprule
\multicolumn{1}{c}{ }&\multicolumn{3}{c}{Civil Conflict Incidence$_t$}  & \multicolumn{1}{c}{High Intensity} & \multicolumn{1}{c}{Low Intensity}& Low Intensity& \multicolumn{1}{c}{Low Intensity} &\multicolumn{1}{c}{Low Intensity}\\
&\multicolumn{3}{c}{}&Conflict$_t$&Conflict$_t$&Incidence$_t$&Onset$_t$ & Offset$_t$\\
& (OLS) &\multicolumn{2}{c}{(IV)}& (IV)& (IV)& (IV)& (IV)& (IV)\\
\cmidrule(lr){2-2}\cmidrule(lr){3-4}  \cmidrule(lr){5-5} \cmidrule(lr){6-6} \cmidrule(lr){7-7}\cmidrule(lr){8-8}\cmidrule(lr){9-9}
&\multicolumn{1}{c}{(1) }&\multicolumn{1}{c}{(2)}&\multicolumn{1}{c}{(3)}&\multicolumn{1}{c}{(4) }&\multicolumn{1}{c}{(5)}&\multicolumn{1}{c}{(6)}&\multicolumn{1}{c}{(7)}&\multicolumn{1}{c}{(8)}\\
\midrule
Log &  0.090 & 0.137 &  &  &  &  &  &  \\ 
\phantom{b}Population 10--14$_t$  &(0.259) & [0.930]&  &  &  &  &  &  \\ 
[0.5em]
Log   &0.071 & 2.595* & 2.413*** & 0.013 & 2.400*** & 1.930*** & 1.470*** & -3.123 \\ 
\phantom{b}Population 15--19$_t$ &(0.225)& [0.086] & [0.002] & [0.978] & [0.000] & [0.000] & [0.000] & [0.524] \\ 
[0.5em]
Log  &  -0.250 & -0.369 &  &  &  &  &  &  \\ 
  \phantom{b}Population 20--24$_t$       &(0.251) & [0.648] &  &  &  &  &  &  \\ 
[0.5em]
Incidence Civil  & &  &  &  &  & 0.295*** &  &  \\ 
  \phantom{b}  Conflict$_{t-1}$      & &  &  &  &  & (0.044) &  &  \\ 
\midrule
Contemporary &\multirow{2}{*}{yes} &\multirow{2}{*}{yes}&\multirow{2}{*}{yes}&\multirow{2}{*}{yes}&\multirow{2}{*}{yes}&\multirow{2}{*}{yes}&\multirow{2}{*}{yes}&\multirow{2}{*}{yes}\\
Drought Shocks &&&&&&&\\
Obs.      &  2193 & 2193 & 2193 & 2193 & 2193 & 2193 & 1890 & 319 \\ 
RMSE &  0.280 & 0.318 & 0.317 & 0.198 & 0.300 & 0.277 & 0.213 & 0.421 \\ 
F-test excl. IV &   & 2.42, 3.63, 2.75& 7.913 & 7.913 & 7.913 & 7.739 & 10.81 & 2.757 \\ 
Kleibergen-Paap &    & 0.080 & 0.039 & 0.039 & 0.039 & 0.041 & 0.022 & 0.053 \\ 
\bottomrule
\end{tabular}}
\begin{tabular}{p{16cm}}
\scriptsize{Note: * \(p<0.10\), ** \(p<0.05\), *** \(p<0.01\). FE estimator regressions in all columns with country dummies, country-specific time trends, regional time dummies and robust standard errors clustered at the level in parentheses. The values in brackets represent the Anderson-Rubin Chi-squared test statistic which is robust to weak instruments. In the case of multiple endogenous variables, we report the subset Anderson-Rubin test statistic for each structural parameter \citep{Guggenberger2012}. RMSE is the root mean square error. The F-test is the first-stage Angrist-Pischke test statistic of the excluded instruments. Kleibergen-Paap is the p-value of the first-stage LM statistic of the excluded instruments. The three F-test values in column (2) represent the first-stage Angrist-Pischke test statistic of the excluded instruments of the three first stage regressions. I.e, with the (log) population of the age group 10--14, 15--19 and  20--24, respectively, as the LHS variable. }\\
\end{tabular}
\end{table}
 
\makeatletter{}\begin{table}[ht]\centering \footnotesize
\def\sym#1{\ifmmode^{#1}\else\(^{#1}\)\fi}
\caption{\small Robustness Cut-off (15th percentile): Youth Bulges and Civil Conflict Incidence: 2SLS-IV}
\label{TaICO15a}
\resizebox{\linewidth}{!}{
\begin{tabular}{l*{8}{c}}
\toprule
\multicolumn{1}{c}{ }&\multicolumn{3}{c}{Civil Conflict Incidence$_t$}  & \multicolumn{1}{c}{High Intensity} & \multicolumn{1}{c}{Low Intensity}& Low Intensity& \multicolumn{1}{c}{Low Intensity} &\multicolumn{1}{c}{Low Intensity}\\
&\multicolumn{3}{c}{}&Conflict$_t$&Conflict$_t$&Incidence$_t$&Onset$_t$ & Offset$_t$\\
& (OLS) &\multicolumn{2}{c}{(IV)}& (IV)& (IV)& (IV)& (IV)& (IV)\\
\cmidrule(lr){2-2}\cmidrule(lr){3-4}  \cmidrule(lr){5-5} \cmidrule(lr){6-6} \cmidrule(lr){7-7}\cmidrule(lr){8-8}\cmidrule(lr){9-9}
&\multicolumn{1}{c}{(1) }&\multicolumn{1}{c}{(2)}&\multicolumn{1}{c}{(3)}&\multicolumn{1}{c}{(4) }&\multicolumn{1}{c}{(5)}&\multicolumn{1}{c}{(6)}&\multicolumn{1}{c}{(7)}&\multicolumn{1}{c}{(8)}\\
\midrule
Log & 0.090 & -0.229 &  &  &  &  &  &  \\ 
\phantom{b}Population 10--14$_t$  &(0.259) & [0.838]&  &  &  &  &  &  \\ 
[0.5em]
Log   &0.071 & 2.453** & 2.101*** & -0.070 & 2.176*** & 1.692*** & 1.181*** & -1.073 \\ 
\phantom{b}Population 15--19$_t$ &(0.225) & [0.042] &[0.001] & [0.870] & [0.000]& [0.000] & [0.000]& 0.752 \\ 
[0.5em]
Log  &  -0.250 & -0.374 &  &  &  &  &  &  \\ 
  \phantom{b}Population 20--24$_t$       &(0.251) & [0.623] &  &  &  &  &  &  \\ 
[0.5em]
Incidence Civil  &  &  &  &  &  & 0.298*** &  &  \\ 
  \phantom{b}  Conflict$_{t-1}$      & &  &  &  &  & (0.044) &  &  \\ 
\midrule
Contemporary &\multirow{2}{*}{yes} &\multirow{2}{*}{yes}&\multirow{2}{*}{yes}&\multirow{2}{*}{yes}&\multirow{2}{*}{yes}&\multirow{2}{*}{yes}&\multirow{2}{*}{yes}&\multirow{2}{*}{yes}\\
Drought Shocks &&&&&&&\\
Obs.      &  2193 & 2193 & 2193 & 2193 & 2193 & 2193 & 1890 & 319 \\ 
RMSE &   0.280 & 0.308 & 0.308 & 0.198 & 0.294 & 0.272 & 0.206 & 0.403 \\ 
F-test excl. IV &  &3.57, 4.17, 3.26 & 9.206 & 9.206 & 9.206 & 9.043 & 12.22 & 4.234 \\ 
Kleibergen-Paap &  & 0.048 & 0.025 & 0.025 & 0.025 & 0.026 & 0.015 & 0.018 \\ 
\bottomrule
\end{tabular}}
\begin{tabular}{p{16cm}}
\scriptsize{Note: * \(p<0.10\), ** \(p<0.05\), *** \(p<0.01\). FE estimator regressions in all columns with country dummies, country-specific time trends, regional time dummies and robust standard errors clustered at the level in parentheses. The values in brackets represent the Anderson-Rubin Chi-squared test statistic which is robust to weak instruments. In the case of multiple endogenous variables, we report the subset Anderson-Rubin test statistic for each structural parameter \citep{Guggenberger2012}. RMSE is the root mean square error. The F-test is the first-stage Angrist-Pischke test statistic of the excluded instruments. Kleibergen-Paap is the p-value of the first-stage LM statistic of the excluded instruments. The three F-test values in column (2) represent the first-stage Angrist-Pischke test statistic of the excluded instruments of the three first stage regressions. I.e, with the (log) population of the age group 10--14, 15--19 and  20--24, respectively, as the LHS variable. }\\
\end{tabular}
\end{table}
 
\makeatletter{}\begin{table}[ht]\centering \footnotesize
\def\sym#1{\ifmmode^{#1}\else\(^{#1}\)\fi}
\caption{\small Robustness Cut-off (25th percentile): Youth Bulges and Civil Conflict Incidence: 2SLS-IV}
\label{TaICO25}
\resizebox{\linewidth}{!}{
\begin{tabular}{l*{8}{c}}
\toprule
\multicolumn{1}{c}{ }&\multicolumn{3}{c}{Civil Conflict Incidence$_t$}  & \multicolumn{1}{c}{High Intensity} & \multicolumn{1}{c}{Low Intensity}& Low Intensity& \multicolumn{1}{c}{Low Intensity} &\multicolumn{1}{c}{Low Intensity}\\
&\multicolumn{3}{c}{}&Conflict$_t$&Conflict$_t$&Incidence$_t$&Onset$_t$ & Offset$_t$\\
& (OLS) &\multicolumn{2}{c}{(IV)}& (IV)& (IV)& (IV)& (IV)& (IV)\\
\cmidrule(lr){2-2}\cmidrule(lr){3-4}  \cmidrule(lr){5-5} \cmidrule(lr){6-6} \cmidrule(lr){7-7}\cmidrule(lr){8-8}\cmidrule(lr){9-9}
&\multicolumn{1}{c}{(1) }&\multicolumn{1}{c}{(2)}&\multicolumn{1}{c}{(3)}&\multicolumn{1}{c}{(4) }&\multicolumn{1}{c}{(5)}&\multicolumn{1}{c}{(6)}&\multicolumn{1}{c}{(7)}&\multicolumn{1}{c}{(8)}\\
\midrule
Log & 0.090 & 0.268 &  &  &  &  &  &  \\ 
\phantom{b}Population 10--14$_t$  &(0.259) & [0.819] &  &  &  &  &  &  \\ 
[0.5em]
Log   &0.071 & 2.762** & 2.819*** & 0.161 & 2.674*** & 2.056*** & 1.249*** & -1.256 \\ 
\phantom{b}Population 15--19$_t$ & (0.225)& [0.017] & [0.000] &[0.712] & [0.000] & [0.000] & [0.000] & [0.781] \\ 
[0.5em]
Log  &-0.250 & -0.097 &  &  &  &  &  &  \\ 
  \phantom{b}Population 20--24$_t$       &(0.251) & [0.901]&  &  &  &  &  &  \\ 
[0.5em]
Incidence Civil  &   &  &  &  &  & 0.294*** &  &  \\ 
  \phantom{b}  Conflict$_{t-1}$      &  &  &  &  &  & (0.044) &  &  \\ 
\midrule
Contemporary &\multirow{2}{*}{yes} &\multirow{2}{*}{yes}&\multirow{2}{*}{yes}&\multirow{2}{*}{yes}&\multirow{2}{*}{yes}&\multirow{2}{*}{yes}&\multirow{2}{*}{yes}&\multirow{2}{*}{yes}\\
Drought Shocks &&&&&&&\\
Obs.      &  2193 & 2193 & 2193 & 2193 & 2193 & 2193 & 1890 & 319 \\ 
RMSE &  0.280 & 0.331 & 0.329 & 0.199 & 0.307 & 0.280 & 0.207 & 0.404 \\ 
F-test excl. IV &  & 1.68, 2.39, 2.40 & 6.545 & 6.545 & 6.545 & 6.360 & 8.017 & 3.062 \\ 
Kleibergen-Paap &  & 0.020 & 0.030 & 0.030 & 0.030 & 0.030 & 0.018 & 0.026 \\ 
\bottomrule
\end{tabular}}
\begin{tabular}{p{16cm}}
\scriptsize{Note: * \(p<0.10\), ** \(p<0.05\), *** \(p<0.01\). FE estimator regressions in all columns with country dummies, country-specific time trends, regional time dummies and robust standard errors clustered at the level in parentheses. The values in brackets represent the Anderson-Rubin Chi-squared test statistic which is robust to weak instruments. In the case of multiple endogenous variables, we report the subset Anderson-Rubin test statistic for each structural parameter \citep{Guggenberger2012}. RMSE is the root mean square error. The F-test is the first-stage Angrist-Pischke test statistic of the excluded instruments. Kleibergen-Paap is the p-value of the first-stage LM statistic of the excluded instruments. The three F-test values in column (2) represent the first-stage Angrist-Pischke test statistic of the excluded instruments of the three first stage regressions. I.e, with the (log) population of the age group 10--14, 15--19 and  20--24, respectively, as the LHS variable. }\\
\end{tabular}
\end{table}
 
\makeatletter{}\begin{table}[ht]\centering \footnotesize
\def\sym#1{\ifmmode^{#1}\else\(^{#1}\)\fi}
\caption{\small Robustness Cut-off (30th percentile): Youth Bulges and Civil Conflict Incidence: 2SLS-IV}
\label{TaICO035}
\resizebox{\linewidth}{!}{
\begin{tabular}{l*{8}{c}}
\toprule
\multicolumn{1}{c}{ }&\multicolumn{3}{c}{Civil Conflict Incidence$_t$}  & \multicolumn{1}{c}{High Intensity} & \multicolumn{1}{c}{Low Intensity}& Low Intensity& \multicolumn{1}{c}{Low Intensity} &\multicolumn{1}{c}{Low Intensity}\\
&\multicolumn{3}{c}{}&Conflict$_t$&Conflict$_t$&Incidence$_t$&Onset$_t$ & Offset$_t$\\
& (OLS) &\multicolumn{2}{c}{(IV)}& (IV)& (IV)& (IV)& (IV)& (IV)\\
\cmidrule(lr){2-2}\cmidrule(lr){3-4}  \cmidrule(lr){5-5} \cmidrule(lr){6-6} \cmidrule(lr){7-7}\cmidrule(lr){8-8}\cmidrule(lr){9-9}
&\multicolumn{1}{c}{(1) }&\multicolumn{1}{c}{(2)}&\multicolumn{1}{c}{(3)}&\multicolumn{1}{c}{(4) }&\multicolumn{1}{c}{(5)}&\multicolumn{1}{c}{(6)}&\multicolumn{1}{c}{(7)}&\multicolumn{1}{c}{(8)}\\
\midrule
Log & 0.090 & 0.681 &  &  &  &  &  &  \\ 
\phantom{b}Population 10--14$_t$  &(0.259) & [0.600]&  &  &  &  &  &  \\ 
[0.5em]
Log   &0.071 & 2.500 & 2.664*** & 0.231 & 2.448*** & 1.909*** & 1.121*** & -3.991 \\ 
\phantom{b}Population 15--19$_t$ &(0.225) & [0.030] & [0.002]& [0.637] & [0.001] & [0.000] & [0.001] & [0.368] \\ 
[0.5em]
Log  &-0.250 & -0.081 &  &  &  &  &  &  \\ 
  \phantom{b}Population 20--24$_t$       &(0.251) & [0.921]&  &  &  &  &  &  \\ 
[0.5em]
Incidence Civil  &  &  &  &  &  & 0.296*** &  &  \\ 
  \phantom{b}  Conflict$_{t-1}$      &   &  &  &  &  & (0.044) &  &  \\ 
\midrule
Contemporary &\multirow{2}{*}{yes} &\multirow{2}{*}{yes}&\multirow{2}{*}{yes}&\multirow{2}{*}{yes}&\multirow{2}{*}{yes}&\multirow{2}{*}{yes}&\multirow{2}{*}{yes}&\multirow{2}{*}{yes}\\
Drought Shocks &&&&&&&\\
Obs.      &  2193 & 2193 & 2193 & 2193 & 2193 & 2193 & 1890 & 319 \\ 
RMSE &   0.280 & 0.333 & 0.324 & 0.199 & 0.301 & 0.277 & 0.204 & 0.431 \\ 
F-test excl. IV &  & 1.18, 2.11, 2.34& 5.689 & 5.689 & 5.689 & 5.517 & 7.164 & 4.700 \\ 
Kleibergen-Paap &    & 0.030 & 0.032 & 0.032 & 0.032 & 0.034 & 0.021 & 0.012 \\ 
\bottomrule
\end{tabular}}
\begin{tabular}{p{16cm}}
\scriptsize{Note: * \(p<0.10\), ** \(p<0.05\), *** \(p<0.01\). FE estimator regressions in all columns with country dummies, country-specific time trends, regional time dummies and robust standard errors clustered at the level in parentheses. The values in brackets represent the Anderson-Rubin Chi-squared test statistic which is robust to weak instruments. In the case of multiple endogenous variables, we report the subset Anderson-Rubin test statistic for each structural parameter \citep{Guggenberger2012}. RMSE is the root mean square error. The F-test is the first-stage Angrist-Pischke test statistic of the excluded instruments. Kleibergen-Paap is the p-value of the first-stage LM statistic of the excluded instruments. The three F-test values in column (2) represent the first-stage Angrist-Pischke test statistic of the excluded instruments of the three first stage regressions. I.e, with the (log) population of the age group 10--14, 15--19 and  20--24, respectively, as the LHS variable. }\\
\end{tabular}
\end{table}
 
\clearpage

\subsection{Use of alternative cut-off time scale of SPEI}
\makeatletter{}\begin{table}[ht]\centering \footnotesize
\def\sym#1{\ifmmode^{#1}\else\(^{#1}\)\fi}
\caption{\small Robustness Time Scale SPEI (3 months): Youth Bulges and Civil Conflict Incidence: 2SLS-IV}
\label{TabTS3}
\resizebox{\linewidth}{!}{
\begin{tabular}{l*{8}{c}}
\toprule
\multicolumn{1}{c}{ }&\multicolumn{3}{c}{Civil Conflict Incidence$_t$}  & \multicolumn{1}{c}{High Intensity} & \multicolumn{1}{c}{Low Intensity}& Low Intensity& \multicolumn{1}{c}{Low Intensity} &\multicolumn{1}{c}{Low Intensity}\\
&\multicolumn{3}{c}{}&Conflict$_t$&Conflict$_t$&Incidence$_t$&Onset$_t$ & Offset$_t$\\
& (OLS) &\multicolumn{2}{c}{(IV)}& (IV)& (IV)& (IV)& (IV)& (IV)\\
\cmidrule(lr){2-2}\cmidrule(lr){3-4}  \cmidrule(lr){5-5} \cmidrule(lr){6-6} \cmidrule(lr){7-7}\cmidrule(lr){8-8}\cmidrule(lr){9-9}
&\multicolumn{1}{c}{(1) }&\multicolumn{1}{c}{(2)}&\multicolumn{1}{c}{(3)}&\multicolumn{1}{c}{(4) }&\multicolumn{1}{c}{(5)}&\multicolumn{1}{c}{(6)}&\multicolumn{1}{c}{(7)}&\multicolumn{1}{c}{(8)}\\
\midrule
Log & 0.090 & 0.216 &  &  &  &  &  &  \\ 
\phantom{b}Population 10--14$_t$  &(0.259) & [0.874] &  &  &  &  &  &  \\ 
[0.5em]
Log   &0.071 & 1.517 & 1.834*** & -0.143 & 1.986*** & 1.558*** & 1.049*** & -1.419 \\ 
\phantom{b}Population 15--19$_t$ & (0.225)& [0.254] & [0.009] & [0.743] & [0.001] & [0.001] & [0.000] & [0.688] \\ 
[0.5em]
Log  &-0.250 & 0.293 &  &  &  &  &  &  \\ 
  \phantom{b}Population 20--24$_t$       &(0.251) & [0.685]&  &  &  &  &  &  \\ 
[0.5em]
Incidence Civil  &  &  &  &  &  & 0.299*** &  &  \\ 
  \phantom{b}  Conflict$_{t-1}$      &  &  &  &  &  & (0.044) &  &  \\ 
\midrule
Contemporary &\multirow{2}{*}{yes} &\multirow{2}{*}{yes}&\multirow{2}{*}{yes}&\multirow{2}{*}{yes}&\multirow{2}{*}{yes}&\multirow{2}{*}{yes}&\multirow{2}{*}{yes}&\multirow{2}{*}{yes}\\
Drought Shocks &&&&&&&\\
Obs.      &  2193 & 2193 & 2193 & 2193 & 2193 & 2193 & 1890 & 319 \\ 
RMSE &  0.280 & 0.303 & 0.302 & 0.197 & 0.289 & 0.269 & 0.203 & 0.405 \\ 
F-test excl. IV &   & 2.53, 4.12, 3.50 & 9.302 & 9.302 & 9.302 & 9.144 & 12.27 & 3.583 \\ 
Kleibergen-Paap &   & 0.025 & 0.027 & 0.027 & 0.0276 & 0.028 & 0.016 & 0.024 \\ 
\bottomrule
\end{tabular}}
\begin{tabular}{p{16cm}}
\scriptsize{Note: * \(p<0.10\), ** \(p<0.05\), *** \(p<0.01\). FE estimator regressions in all columns with country dummies, country-specific time trends, regional time dummies and robust standard errors clustered at the level in parentheses. The values in brackets represent the Anderson-Rubin Chi-squared test statistic which is robust to weak instruments. In the case of multiple endogenous variables, we report the subset Anderson-Rubin test statistic for each structural parameter \citep{Guggenberger2012}. RMSE is the root mean square error. The F-test is the first-stage Angrist-Pischke test statistic of the excluded instruments. Kleibergen-Paap is the p-value of the first-stage LM statistic of the excluded instruments. The three F-test values in column (2) represent the first-stage Angrist-Pischke test statistic of the excluded instruments of the three first stage regressions. I.e, with the (log) population of the age group 10--14, 15--19 and  20--24, respectively, as the LHS variable. }\\
\end{tabular}
\end{table}
 
\makeatletter{}\begin{table}[ht]\centering \footnotesize
\def\sym#1{\ifmmode^{#1}\else\(^{#1}\)\fi}
\caption{\small Robustness Time Scale SPEI (5 months): Youth Bulges and Civil Conflict Incidence: 2SLS-IV}
\label{TabTS5}
\resizebox{\linewidth}{!}{
\begin{tabular}{l*{8}{c}}
\toprule
\multicolumn{1}{c}{ }&\multicolumn{3}{c}{Civil Conflict Incidence$_t$}  & \multicolumn{1}{c}{High Intensity} & \multicolumn{1}{c}{Low Intensity}& Low Intensity& \multicolumn{1}{c}{Low Intensity} &\multicolumn{1}{c}{Low Intensity}\\
&\multicolumn{3}{c}{}&Conflict$_t$&Conflict$_t$&Incidence$_t$&Onset$_t$ & Offset$_t$\\
& (OLS) &\multicolumn{2}{c}{(IV)}& (IV)& (IV)& (IV)& (IV)& (IV)\\
\cmidrule(lr){2-2}\cmidrule(lr){3-4}  \cmidrule(lr){5-5} \cmidrule(lr){6-6} \cmidrule(lr){7-7}\cmidrule(lr){8-8}\cmidrule(lr){9-9}
&\multicolumn{1}{c}{(1) }&\multicolumn{1}{c}{(2)}&\multicolumn{1}{c}{(3)}&\multicolumn{1}{c}{(4) }&\multicolumn{1}{c}{(5)}&\multicolumn{1}{c}{(6)}&\multicolumn{1}{c}{(7)}&\multicolumn{1}{c}{(8)}\\
\midrule
Log & 0.090 & 0.203 &  &  &  &  &  &  \\ 
\phantom{b}Population 10--14$_t$  &(0.259) & [0.878] &  &  &  &  &  &  \\ 
[0.5em]
Log   &0.071 & 2.689** & 2.706*** & 0.114 & 2.596*** & 1.968*** & 1.339*** & 0.859 \\ 
\phantom{b}Population 15--19$_t$&(0.225)& [0.028] & [0.000] & [0.801] & [0.000] & [0.000] & [0.000] & [0.834] \\ 
[0.5em]
Log  &-0.250 & -0.090 &  &  &  &  &  &  \\ 
  \phantom{b}Population 20--24$_t$       &(0.251) & [0.912]&  &  &  &  &  &  \\ 
[0.5em]
Incidence Civil  &    &  &  &  &  & 0.295*** &  &  \\ 
  \phantom{b}  Conflict$_{t-1}$      & &  &  &  &  & (0.044) &  &  \\ 
\midrule
Contemporary &\multirow{2}{*}{yes} &\multirow{2}{*}{yes}&\multirow{2}{*}{yes}&\multirow{2}{*}{yes}&\multirow{2}{*}{yes}&\multirow{2}{*}{yes}&\multirow{2}{*}{yes}&\multirow{2}{*}{yes}\\
Drought Shocks &&&&&&&\\
Obs.      &  2193 & 2193 & 2193 & 2193 & 2193 & 2193 & 1890 & 319 \\ 
RMSE & 0.280 & 0.328 & 0.326 & 0.198 & 0.305 & 0.278 & 0.209 & 0.396 \\ 
F-test excl. IV &  & 1.33, 2.59, 3.07 & 6.946 & 6.946 & 6.946 & 6.759 & 8.062 & 4.815 \\ 
Kleibergen-Paap &   & 0.056 & 0.023 & 0.023 & 0.023 & 0.025 & 0.017 & 0.008 \\ 
\bottomrule
\end{tabular}}
\begin{tabular}{p{16cm}}
\scriptsize{Note: * \(p<0.10\), ** \(p<0.05\), *** \(p<0.01\). FE estimator regressions in all columns with country dummies, country-specific time trends, regional time dummies and robust standard errors clustered at the level in parentheses. The values in brackets represent the Anderson-Rubin Chi-squared test statistic which is robust to weak instruments. In the case of multiple endogenous variables, we report the subset Anderson-Rubin test statistic for each structural parameter \citep{Guggenberger2012}. RMSE is the root mean square error. The F-test is the first-stage Angrist-Pischke test statistic of the excluded instruments. Kleibergen-Paap is the p-value of the first-stage LM statistic of the excluded instruments. The three F-test values in column (2) represent the first-stage Angrist-Pischke test statistic of the excluded instruments of the three first stage regressions. I.e, with the (log) population of the age group 10--14, 15--19 and  20--24, respectively, as the LHS variable. }\\
\end{tabular}
\end{table}
 
\clearpage

\subsection{Use of alternative growing seasons}
\makeatletter{}\begin{table}[ht]\centering \footnotesize
\def\sym#1{\ifmmode^{#1}\else\(^{#1}\)\fi}
\caption{\small Robustness Growing Season (All months included): Youth Bulges and Civil Conflict Incidence: 2SLS-IV}
\label{TabAGS}
\resizebox{\linewidth}{!}{
\begin{tabular}{l*{8}{c}}
\toprule
\multicolumn{1}{c}{ }&\multicolumn{3}{c}{Civil Conflict Incidence$_t$}  & \multicolumn{1}{c}{High Intensity} & \multicolumn{1}{c}{Low Intensity}& Low Intensity& \multicolumn{1}{c}{Low Intensity} &\multicolumn{1}{c}{Low Intensity}\\
&\multicolumn{3}{c}{}&Conflict$_t$&Conflict$_t$&Incidence$_t$&Onset$_t$ & Offset$_t$\\
& (OLS) &\multicolumn{2}{c}{(IV)}& (IV)& (IV)& (IV)& (IV)& (IV)\\
\cmidrule(lr){2-2}\cmidrule(lr){3-4}  \cmidrule(lr){5-5} \cmidrule(lr){6-6} \cmidrule(lr){7-7}\cmidrule(lr){8-8}\cmidrule(lr){9-9}
&\multicolumn{1}{c}{(1) }&\multicolumn{1}{c}{(2)}&\multicolumn{1}{c}{(3)}&\multicolumn{1}{c}{(4) }&\multicolumn{1}{c}{(5)}&\multicolumn{1}{c}{(6)}&\multicolumn{1}{c}{(7)}&\multicolumn{1}{c}{(8)}\\
\midrule
Log & 0.090 & -0.039 &  &  &  &  &  &  \\ 
\phantom{b}Population 10--14$_t$  &(0.259) & [0.998] &  &  &  &  &  &  \\ 
[0.5em]
Log   &0.071 & 2.093 & 3.219** & 1.044 & 2.166* & 1.855* & 1.294*** & 45.204 \\ 
\phantom{b}Population 15--19$_t$&(0.225) & [0.835] & [0.029] & [0.334] & [0.093] & [0.052] & [0.003] & [0.125] \\ 
[0.5em]
Log  &-0.250 & 2.946 &  &  &  &  &  &  \\ 
  \phantom{b}Population 20--24$_t$       &(0.251) &[0.803]&  &  &  &  &  &  \\ 
[0.5em]
Incidence Civil  & &  &  &  &  & 0.296*** &  &  \\ 
  \phantom{b}  Conflict$_{t-1}$      &   &  &  &  &  & (0.048) &  &  \\ 
\midrule
Contemporary &\multirow{2}{*}{yes} &\multirow{2}{*}{yes}&\multirow{2}{*}{yes}&\multirow{2}{*}{yes}&\multirow{2}{*}{yes}&\multirow{2}{*}{yes}&\multirow{2}{*}{yes}&\multirow{2}{*}{yes}\\
Drought Shocks &&&&&&&\\
Obs.      &  2193 & 2193 & 2193 & 2193 & 2193 & 2193 & 1890 & 319 \\ 
RMSE &0.280 & 0.404 & 0.343 & 0.212 & 0.294 & 0.275 & 0.208 & 1.513 \\ 
F-test excl. IV & & 0.63, 1.34, 0.80 & 1.500 & 1.500 & 1.500 & 1.459 & 3.434 & 0.095 \\ 
Kleibergen-Paap &  & 0.858 & 0.210 & 0.210 & 0.210 & 0.216 & 0.072 & 0.634 \\ 
\bottomrule
\end{tabular}}
\begin{tabular}{p{16cm}}
\scriptsize{Note: * \(p<0.10\), ** \(p<0.05\), *** \(p<0.01\). FE estimator regressions in all columns with country dummies, country-specific time trends, regional time dummies and robust standard errors clustered at the level in parentheses. The values in brackets represent the Anderson-Rubin Chi-squared test statistic which is robust to weak instruments. In the case of multiple endogenous variables, we report the subset Anderson-Rubin test statistic for each structural parameter \citep{Guggenberger2012}. RMSE is the root mean square error. The F-test is the first-stage Angrist-Pischke test statistic of the excluded instruments. Kleibergen-Paap is the p-value of the first-stage LM statistic of the excluded instruments. The three F-test values in column (2) represent the first-stage Angrist-Pischke test statistic of the excluded instruments of the three first stage regressions. I.e, with the (log) population of the age group 10--14, 15--19 and  20--24, respectively, as the LHS variable. }\\
\end{tabular}
\end{table}
 
\makeatletter{}\begin{table}[ht]\centering \footnotesize
\def\sym#1{\ifmmode^{#1}\else\(^{#1}\)\fi}
\caption{\small Robustness Growing Season \citep{VrielingEtAl2013}: Youth Bulges and Civil Conflict Incidence: 2SLS-IV}
\label{TabVrieling}
\resizebox{\linewidth}{!}{
\begin{tabular}{l*{8}{c}}
\toprule
\multicolumn{1}{c}{ }&\multicolumn{3}{c}{Civil Conflict Incidence$_t$}  & \multicolumn{1}{c}{High Intensity} & \multicolumn{1}{c}{Low Intensity}& Low Intensity& \multicolumn{1}{c}{Low Intensity} &\multicolumn{1}{c}{Low Intensity}\\
&\multicolumn{3}{c}{}&Conflict$_t$&Conflict$_t$&Incidence$_t$&Onset$_t$ & Offset$_t$\\
& (OLS) &\multicolumn{2}{c}{(IV)}& (IV)& (IV)& (IV)& (IV)& (IV)\\
\cmidrule(lr){2-2}\cmidrule(lr){3-4}  \cmidrule(lr){5-5} \cmidrule(lr){6-6} \cmidrule(lr){7-7}\cmidrule(lr){8-8}\cmidrule(lr){9-9}
&\multicolumn{1}{c}{(1) }&\multicolumn{1}{c}{(2)}&\multicolumn{1}{c}{(3)}&\multicolumn{1}{c}{(4) }&\multicolumn{1}{c}{(5)}&\multicolumn{1}{c}{(6)}&\multicolumn{1}{c}{(7)}&\multicolumn{1}{c}{(8)}\\
\midrule
Log &0.090 & -0.365 &  &  &  &  &  &  \\ 
\phantom{b}Population 10--14$_t$  &(0.259) & [0.808] &  &  &  &  &  &  \\ 
[0.5em]
Log   &0.071 & 2.114 & 2.654*** & 0.587 & 2.088*** & 1.681*** & 1.232*** & -1.772 \\ 
\phantom{b}Population 15--19$_t$&(0.225) & [0.179] &[0.002] & [0.315] & [0.001] & [0.001] & [0.000] & [0.813] \\ 
[0.5em]
Log  &-0.250 & 0.992 &  &  &  &  &  &  \\ 
  \phantom{b}Population 20--24$_t$       &(0.251) & [0.307]&  &  &  &  &  &  \\ 
[0.5em]
Incidence Civil  &  &  &  &  &  & 0.298*** &  &  \\
  \phantom{b}  Conflict$_{t-1}$      &   &  &  &  &  & (0.044) &  &  \\ 
\midrule
Contemporary &\multirow{2}{*}{yes} &\multirow{2}{*}{yes}&\multirow{2}{*}{yes}&\multirow{2}{*}{yes}&\multirow{2}{*}{yes}&\multirow{2}{*}{yes}&\multirow{2}{*}{yes}&\multirow{2}{*}{yes}\\
Drought Shocks &&&&&&&\\
Obs.      &  2193 & 2193 & 2193 & 2193 & 2193 & 2193 & 1890 & 319 \\ 
RMSE &  &  &  &  &  & (0.044) &  &  \\ 
F-test excl. IV &   & 1.88, 2.57, 1.19 & 4.632 & 4.632 & 4.632 & 4.519 & 7.170 & 1.932 \\ 
Kleibergen-Paap &   & 0.044 & 0.078 & 0.078 & 0.078 & 0.082 & 0.042 & 0.078 \\ 
\bottomrule
\end{tabular}}
\begin{tabular}{p{16cm}}
\scriptsize{Note: * \(p<0.10\), ** \(p<0.05\), *** \(p<0.01\). FE estimator regressions in all columns with country dummies, country-specific time trends, regional time dummies and robust standard errors clustered at the level in parentheses. The values in brackets represent the Anderson-Rubin Chi-squared test statistic which is robust to weak instruments. In the case of multiple endogenous variables, we report the subset Anderson-Rubin test statistic for each structural parameter \citep{Guggenberger2012}. RMSE is the root mean square error. The F-test is the first-stage Angrist-Pischke test statistic of the excluded instruments. Kleibergen-Paap is the p-value of the first-stage LM statistic of the excluded instruments. The three F-test values in column (2) represent the first-stage Angrist-Pischke test statistic of the excluded instruments of the three first stage regressions. I.e, with the (log) population of the age group 10--14, 15--19 and  20--24, respectively, as the LHS variable. }\\
\end{tabular}
\end{table}
 
\clearpage

\subsection{Use of rainfall as instrument}
\makeatletter{}\begin{table}[ht]\centering \footnotesize
\def\sym#1{\ifmmode^{#1}\else\(^{#1}\)\fi}
\caption{\small Robustness Rainfall Instrument: Youth Bulges and Civil Conflict Incidence: 2SLS-IV}
\label{TabRain}
\resizebox{\linewidth}{!}{
\begin{tabular}{l*{8}{c}}
\toprule
\multicolumn{1}{c}{ }&\multicolumn{3}{c}{Civil Conflict Incidence$_t$}  & \multicolumn{1}{c}{High Intensity} & \multicolumn{1}{c}{Low Intensity}& Low Intensity& \multicolumn{1}{c}{Low Intensity} &\multicolumn{1}{c}{Low Intensity}\\
&\multicolumn{3}{c}{}&Conflict$_t$&Conflict$_t$&Incidence$_t$&Onset$_t$ & Offset$_t$\\
& (OLS) &\multicolumn{2}{c}{(IV)}& (IV)& (IV)& (IV)& (IV)& (IV)\\
\cmidrule(lr){2-2}\cmidrule(lr){3-4}  \cmidrule(lr){5-5} \cmidrule(lr){6-6} \cmidrule(lr){7-7}\cmidrule(lr){8-8}\cmidrule(lr){9-9}
&\multicolumn{1}{c}{(1) }&\multicolumn{1}{c}{(2)}&\multicolumn{1}{c}{(3)}&\multicolumn{1}{c}{(4) }&\multicolumn{1}{c}{(5)}&\multicolumn{1}{c}{(6)}&\multicolumn{1}{c}{(7)}&\multicolumn{1}{c}{(8)}\\
\midrule
Log &0.106 & -1.506 &  &  &  &  &  &  \\ 
\phantom{b}Population 10--14$_t$  &(0.255) & [0.502]&  &  &  &  &  &  \\ 
[0.5em]
Log   &0.077 & 2.250 & 1.969** & -0.294 & 2.206** & 1.785** & 1.618*** & 1.114 \\ 
\phantom{b}Population 15--19$_t$&  (0.219)& [0.457] & [0.037] & [0.619] & [0.016] & [0.020] & [0.007] & [0.726] \\ 
[0.5em]
Log  &-0.244 & 0.888 &  &  &  &  &  &  \\ 
  \phantom{b}Population 20--24$_t$       &(0.253) & [0.695]&  &  &  &  &  &  \\ 
[0.5em]
Incidence Civil  & &  &  &  &  & 0.295*** &  &  \\ 
  \phantom{b}  Conflict$_{t-1}$      &  &  &  &  &  & (0.044) &  &  \\ 
\midrule
Contemporary &\multirow{2}{*}{yes} &\multirow{2}{*}{yes}&\multirow{2}{*}{yes}&\multirow{2}{*}{yes}&\multirow{2}{*}{yes}&\multirow{2}{*}{yes}&\multirow{2}{*}{yes}&\multirow{2}{*}{yes}\\
Drought Shocks &&&&&&&\\
Obs.      &  2193 & 2193 & 2193 & 2193 & 2193 & 2193 & 1890 & 319 \\ 
RMSE &0.279 & 0.318 & 0.304 & 0.197 & 0.294 & 0.273 & 0.217 & 0.395 \\ 
F-test excl. IV & & 1.47, 2.54, 2.98 & 6.530 & 6.530 & 6.530 & 6.344 & 6.230 & 2.323 \\ 
Kleibergen-Paap & & 0.133 & 0.011 & 0.011 & 0.011 & 0.012 & 0.011 & 0.039 \\ 
\bottomrule
\end{tabular}}
\begin{tabular}{p{16cm}}
\scriptsize{Note: * \(p<0.10\), ** \(p<0.05\), *** \(p<0.01\). FE estimator regressions in all columns with country dummies, country-specific time trends, regional time dummies and robust standard errors clustered at the level in parentheses. The values in brackets represent the Anderson-Rubin Chi-squared test statistic which is robust to weak instruments. In the case of multiple endogenous variables, we report the subset Anderson-Rubin test statistic for each structural parameter \citep{Guggenberger2012}. RMSE is the root mean square error. The F-test is the first-stage Angrist-Pischke test statistic of the excluded instruments. Kleibergen-Paap is the p-value of the first-stage LM statistic of the excluded instruments. The three F-test values in column (2) represent the first-stage Angrist-Pischke test statistic of the excluded instruments of the three first stage regressions. I.e, with the (log) population of the age group 10--14, 15--19 and  20--24, respectively, as the LHS variable. The instrument is constructed as the average (log) amount of birth year rainfall for each age group. The rainfall data are drawn from \citet{Schneider2011}.}\\
\end{tabular}
\end{table}
 


\clearpage
\subsection{Alternative Coding and Data Sources}
\makeatletter{}\makeatletter{}\begin{table}[h!]\centering
\small 
\def\sym#1{\ifmmode^{#1}\else\(^{#1}\)\fi}
\caption{\small Robustness 2SLS-IV - Alternative Onset/Offset Coding and Alternative Conflict Data}
\label{TaAp1}
\begin{tabular}{l*{5}{c}}
\toprule

&   \multicolumn{2}{c}{  Onset  }     & \multicolumn{2}{c}{  Offset } & \multicolumn{1}{c}{  Any Coup$^c$  }  \\
        [-0.25em]
&    \multicolumn{2}{c}{  Civil Conflict$_t$ }  &\multicolumn{2}{c}{  Civil Conflict$_t$  }  &  \\
\cmidrule(r){2-3} \cmidrule(r){4-5}\cmidrule(lr){6-6} 
&\multicolumn{1}{c}{(1)$^a$}&\multicolumn{1}{c}{(2)$^b$}&\multicolumn{1}{c}{(3)$^a$}&\multicolumn{1}{c}{(4)$^b$}&\multicolumn{1}{c}{(5)}\\
\midrule
Log    & 1.325***& 1.712*** & 0.446 & -0.092 & 1.526** \\ 
 \phantom{b} Population 15--19$_{t}$  &  [0.000]& [0.000]& [0.930] & [0.747] & [0.021] \\  [0.5em]
Incidence Civil &    & -0.221*** &  & 0.482*** &  \\ 
\phantom{b} Conflict$_{t-1}$&  & (0.037) &  & (0.044) &  \\ 
\midrule
Contemporary &\multirow{2}{*}{yes} &\multirow{2}{*}{yes}&\multirow{2}{*}{yes}&\multirow{2}{*}{yes}&\multirow{2}{*}{yes}\\
Drought Shocks &&&&&\\
Obs.      &1,818 & 2,193 & 205 & 2,193 & 2,012 \\ 
RMSE      &        0.209 & 0.233 & 0.409 & 0.160 & 0.267 \\ 
F-test excl. IV         &11.28 & 8.362 & 2.645 & 8.362 & 2.630 \\ 
Kleibergen-Paap &0.207 & 0.227 & 0.391 & 0.160 & 0.268 \\ 
\bottomrule
\end{tabular}
\begin{tabular}{p{\textwidth}}
\scriptsize{Note: ** \(p<0.05\), *** \(p<0.01\). FE estimator regressions in all columns with country dummies, country-specific time trends, regional time dummies and robust standard errors clustered at the level in parentheses. The values in brackets represent the Anderson-Rubin Chi-squared test statistic which is robust to weak instruments. RMSE is the root mean square error. The F-test is the first-stage Angrist-Pischke test statistic of the excluded instruments. Kleibergen-Paap is the p-value of the first-stage LM statistic of the excluded instruments.}\\ 
\scriptsize{$^a$ Onset (offset) is coded following \citet{Miguel2004}, where continued periods of conflict (peace) as well as the onset of peace (conflict) is coded as missing.}\\
[-0.25em]
\scriptsize{$^b$ Onset (offset) is coded following \citet{Fearon2003}, where all onsets (offsets) are coded as one, and zero otherwise. In the regression, we the control for lagged conflict.} \\[-0.25em]
\scriptsize{$^c$ Information regarding coup d'etat attempts are drawn from \citet{PowellThyne2011}.} \\
\end{tabular}
\end{table}
%\end{landscape}
 
 

\clearpage
\subsection{Use of relative youth bulge measure}
\makeatletter{}\begin{table}[ht]\centering \footnotesize
\def\sym#1{\ifmmode^{#1}\else\(^{#1}\)\fi}
\caption{\small Robustness: Relative Youth Bulge Measure}
\label{tab:relative}
\resizebox{\linewidth}{!}{
\begin{tabular}{l*{6}{c}}
\toprule
\multicolumn{1}{c}{ }&\multicolumn{1}{c}{Civil Conflict Incidence$_t$}  & \multicolumn{1}{c}{High Intensity} & \multicolumn{1}{c}{Low Intensity}& Low Intensity& \multicolumn{1}{c}{Low Intensity} &\multicolumn{1}{c}{Low Intensity}\\
&\multicolumn{1}{c}{}&Conflict$_t$&Conflict$_t$&Incidence$_t$&Onset$_t$ & Offset$_t$\\
& \multicolumn{1}{c}{(IV)}& (IV)& (IV)& (IV)& (IV)& (IV)\\
\cmidrule(lr){2-2}\cmidrule(lr){3-4}  \cmidrule(lr){5-5} \cmidrule(lr){6-6} \cmidrule(lr){7-7}
&\multicolumn{1}{c}{(1) }&\multicolumn{1}{c}{(2)}&\multicolumn{1}{c}{(3)}&\multicolumn{1}{c}{(4) }&\multicolumn{1}{c}{(5)}&\multicolumn{1}{c}{(6)}\\
\midrule
Population&6.786*** & -0.147 & 6.963*** & 5.418*** & 3.651*** & 0.240 \\ 
  \phantom{b} Share 15--19$_t$  &   [0.000]& [0.909] & [0.000]& [0.000]& [0.000]& [0.964] \\ 
[0.5em]
Incidence Civil  &  &  &  & 0.286*** &  &  \\ 
  \phantom{b}  Conflict$_{t-1}$      &  &  &  & (0.050) &  &  \\ 
\midrule
Contemporary &\multirow{2}{*}{yes} &\multirow{2}{*}{yes}&\multirow{2}{*}{yes}&\multirow{2}{*}{yes}&\multirow{2}{*}{yes}&\multirow{2}{*}{yes}\\
Drought Shocks &&&&&&\\
Obs.      &  2193 & 2193 & 2193 & 2193 & 1890 & 319 \\ 
RMSE &   0.315 & 0.198 & 0.310 & 0.283 & 0.210 & 0.398 \\ 
F-test excl. IV & 3.520 & 3.520 & 3.520 & 3.315 & 3.168 & 4.415 \\ 
Kleibergen-Paap & 0.070 & 0.070 & 0.070 & 0.078 & 0.085 & 0.056 \\ 
\bottomrule
\end{tabular}}
\begin{tabular}{p{0.99\linewidth}}
\scriptsize{Note: * \(p<0.10\), ** \(p<0.05\), *** \(p<0.01\). FE estimator regressions in all columns with country dummies, country-specific time trends, regional time dummies and robust standard errors clustered at the level in parentheses. The values in brackets represent the Anderson-Rubin Chi-squared test statistic which is robust to weak instruments. In the case of multiple endogenous variables, we report the subset Anderson-Rubin test statistic for each structural parameter \citep{Guggenberger2012}. RMSE is the root mean square error. The F-test is the first-stage Angrist-Pischke test statistic of the excluded instruments. Kleibergen-Paap is the p-value of the first-stage LM statistic of the excluded instruments. Population Share 15--19$_t$ refers to the number of 15--19 year olds relative to the adult population (30+)}\\
\end{tabular}
\end{table}
 

\makeatletter{}\begin{figure}[h!]
\vspace*{-2em}
\includegraphics[width=\textwidth]{CoeffShockCI.pdf}
\caption{{\footnotesize Graph depicts the effect of the individual birth year shocks $t-10$ to $t-24$ on the risk of conflict incidence (defined in Eq.(4)). The shaded represents the 90 percent confidence interval.}}
\label{fig:coeff}
\end{figure} 
\makeatletter{}\begin{figure}[h!]
\vspace*{-2em}
\includegraphics[width=\textwidth]{CoeffPlotAgeGroup.pdf}
\caption{{\footnotesize Graph depicts the effects of the age-group specific drought measures on the risk of conflict incidence (defined in Eq.(5)). The shaded represents the 90 percent confidence interval.}}
\label{fig:coeffGroup}
\end{figure} 
%\input{Admin2.tex}
 
\makeatletter{}\section{IPUMS Data}\label{s:IPUMS}

To construct age group specific unemployment rate and school attainment levels at the sub-national level, we use harmonized, regionally representative survey information provided by the IPUMS-international database \citep{IPUMS}. 

We build the region-level outcome variables by computing the weighted average over all the individuals that pertain to the age group of interest. The weights are provided by IPUMS. For example, we construct the unemployment rate of the age group 15--19 in the following manner: In a first step, we restrict the sample to persons aged 15--19. Second, we construct an indicator variable capturing whether a person is employed or not. In the last step, we compute the weighted average of this unemployment indicator for each region and year. The regional-level average number of years of schooling is constructed analogously. To compute the population size of group aged 15--19, we simply sum the sampling weights provided by IPUMS within each year and region.

Apart from providing individual level information regarding employment and schooling status, the database also reports in which region of a country an individual lives in. For each of these regions, IPUMS provides polygons which enables us to construct the region-specific drought-shock measure defined in Section 4. The drought data are then matched to the regional level outcome variable. 

To construct the conflict onset indicator, we use the geocoded conflict data from the UCDP GED Conflict Polygons \citep{ucdp}. This geocoded dataset is available for the time period 1989--2010. Using this data we can determine whether a conflict occurred in a given region and year.

The final dataset spans the years 1989--2010 and contains 136 sub-national regions of 11 countries. These countries are: Burkina Faso, Ghana, Kenya, Malawi, Mali, Mozambique, Nigeria, Rwanda, South Africa, Uganda, and Zambia. 
\subsection{Effects of adjacent age groups at sub-national Level}
\makeatletter{}\begin{table}[ht]\centering \footnotesize
\def\sym#1{\ifmmode^{#1}\else\(^{#1}\)\fi}
\caption{Robustness Adjacent Age Groups: Mechanism}
\label{TabMec20}
\resizebox{\linewidth}{!}{
\begin{tabular}{l*{8}{c}}
\toprule
\multicolumn{1}{c}{ }&\multicolumn{2}{c}{Conflict }&\multicolumn{1}{c}{Unemployment}&\multicolumn{1}{c}{Unemployment}&\multicolumn{2}{c}{Unemployment} &\multicolumn{1}{c}{Log Years of Schooling} &\multicolumn{1}{c}{Log Years of Schooling} \\
&\multicolumn{2}{c}{Incidence$_t$}&\multicolumn{1}{c}{Population 10--14$_t$}&\multicolumn{1}{c}{Population 20--24$_t$}&\multicolumn{2}{c}{Population 15--65$_t$}&\multicolumn{1}{c}{Population 10--14$_t$}&\multicolumn{1}{c}{Population 20--24$_t$}\\
\cmidrule(lr){2-3} \cmidrule(lr){4-4}  \cmidrule(lr){5-5}  \cmidrule(lr){6-7}   \cmidrule(lr){8-8}   \cmidrule(lr){9-9} 
&\multicolumn{1}{c}{(1) }&\multicolumn{1}{c}{(2)}&\multicolumn{1}{c}{(3)}&\multicolumn{1}{c}{(4) }&\multicolumn{1}{c}{(5)}&\multicolumn{1}{c}{(6)}&\multicolumn{1}{c}{(7)}&\multicolumn{1}{c}{(8)}\\
\midrule
S$^{10-14}_t$  &-0.282 &  & 0.019 &  & 0.022 &  & -0.096 &  \\ 
 &(0.309) &  & (0.074) &  & (0.015) &  & (0.089) &  \\ 
[0.5em]
S$^{20-24}_t$ &   & 0.012 &  & -0.019 &  & -0.018 &  & -0.126 \\ 
&  & (0.294) &  & (0.040) &  & (0.017) &  & (0.206) \\ 
\midrule
Obs.      &388 & 388 & 374 & 388 & 388 & 388 & 336 & 336 \\ 
RMSE      &0.353 & 0.354 & 0.135 & 0.0535 & 0.0176 & 0.0176 & 0.119 & 0.180 \\ 
\bottomrule
\end{tabular}}
\begin{tabular}{p{0.99\linewidth}}
\scriptsize{Note: * \(p<0.10\), ** \(p<0.05\), *** \(p<0.01\). S$^{10-14}_t$ (S$^{20-24}_t$) represents the drought shock measure for population group aged 10--14 (20--24) defined according to Eq.\eqref{eq:SPEI2}. FE estimator regressions in all columns with country dummies, country-specific time trends, regional time dummies and robust standard errors clustered at the level in parentheses.}\\
\end{tabular}
\end{table}
 
\bibliographystyle{cje}
\bibliography{Bulge}
\end{document}  
